# Supplementary material
Source: publisher figshare collection journal article supplement (https://tandf.figshare.com/ndownloader/files/15374384)
Supplement: Supplementary file 1 [file 15374384]

Supporting Information


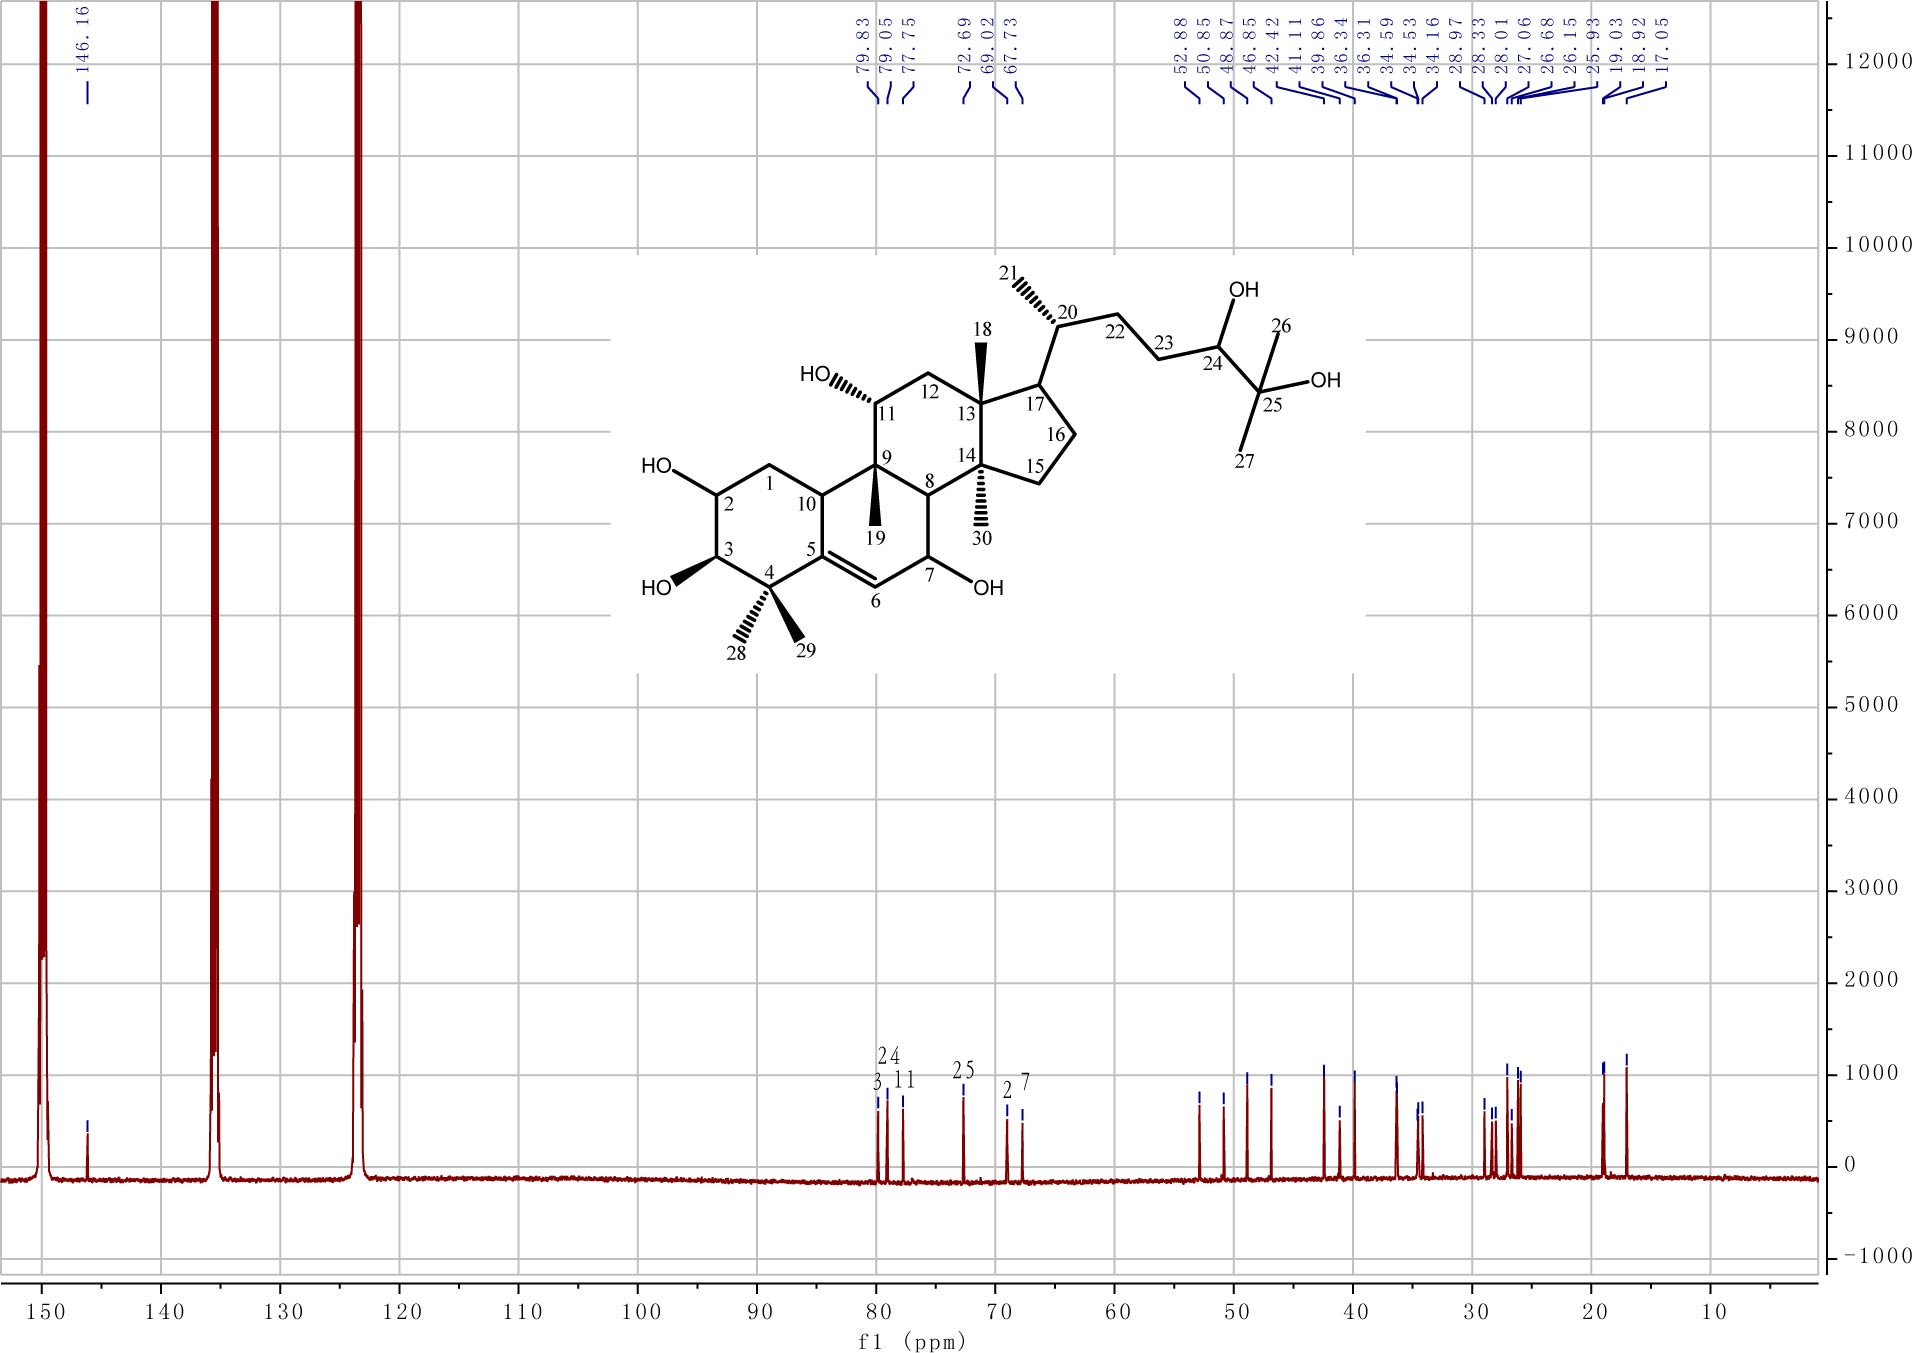


Fig. S1. 13C NMR of compound **1**.


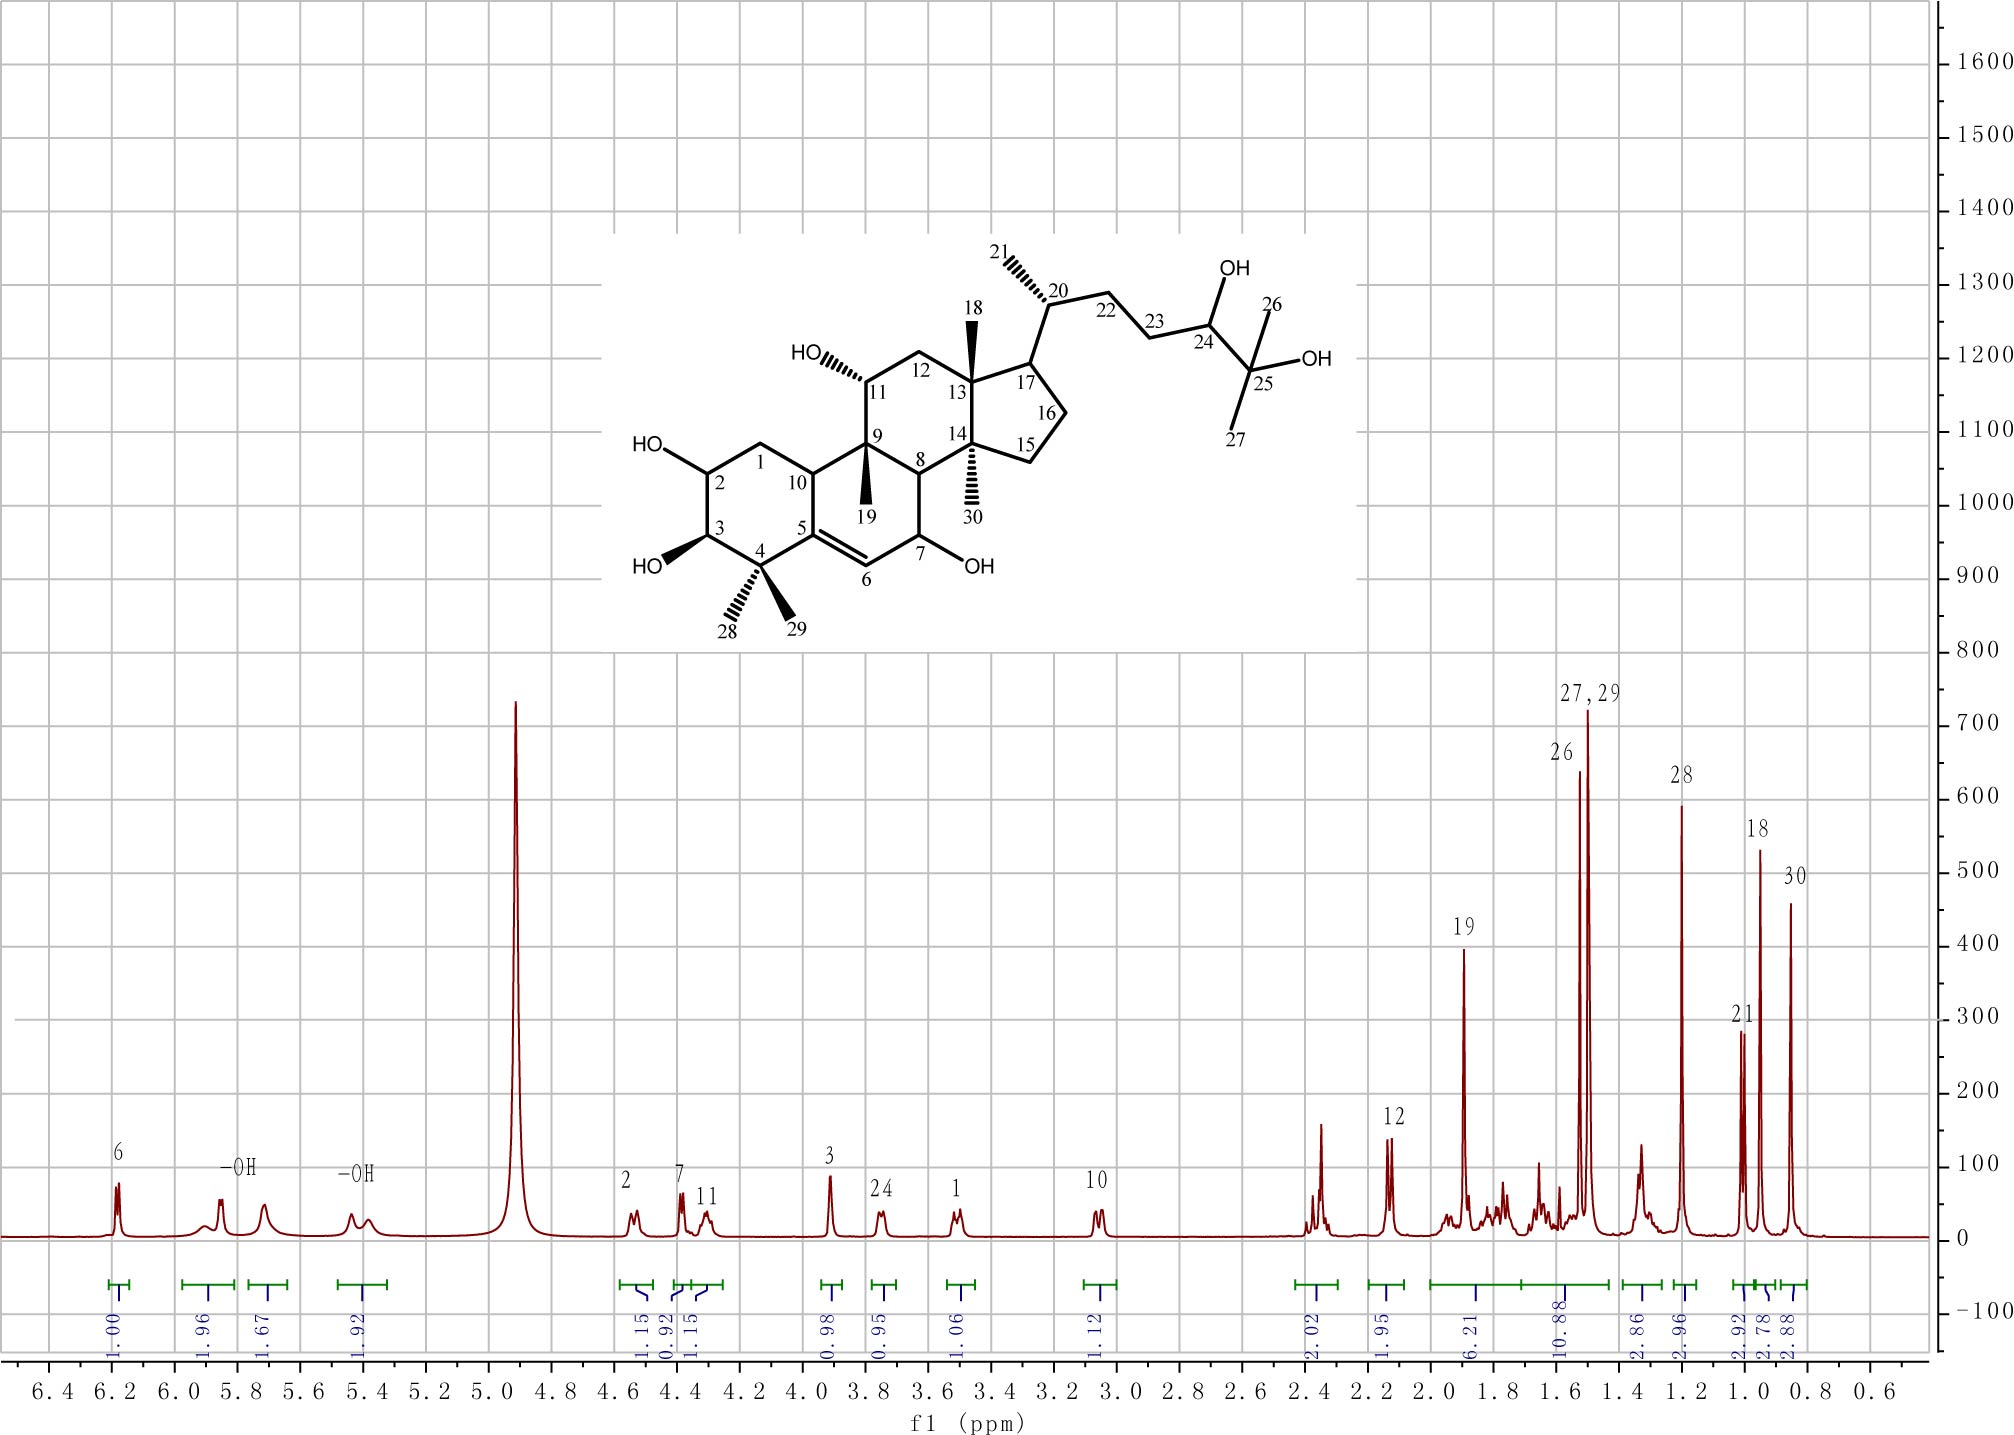


Fig. S2. 1H NMR of compound **1**.


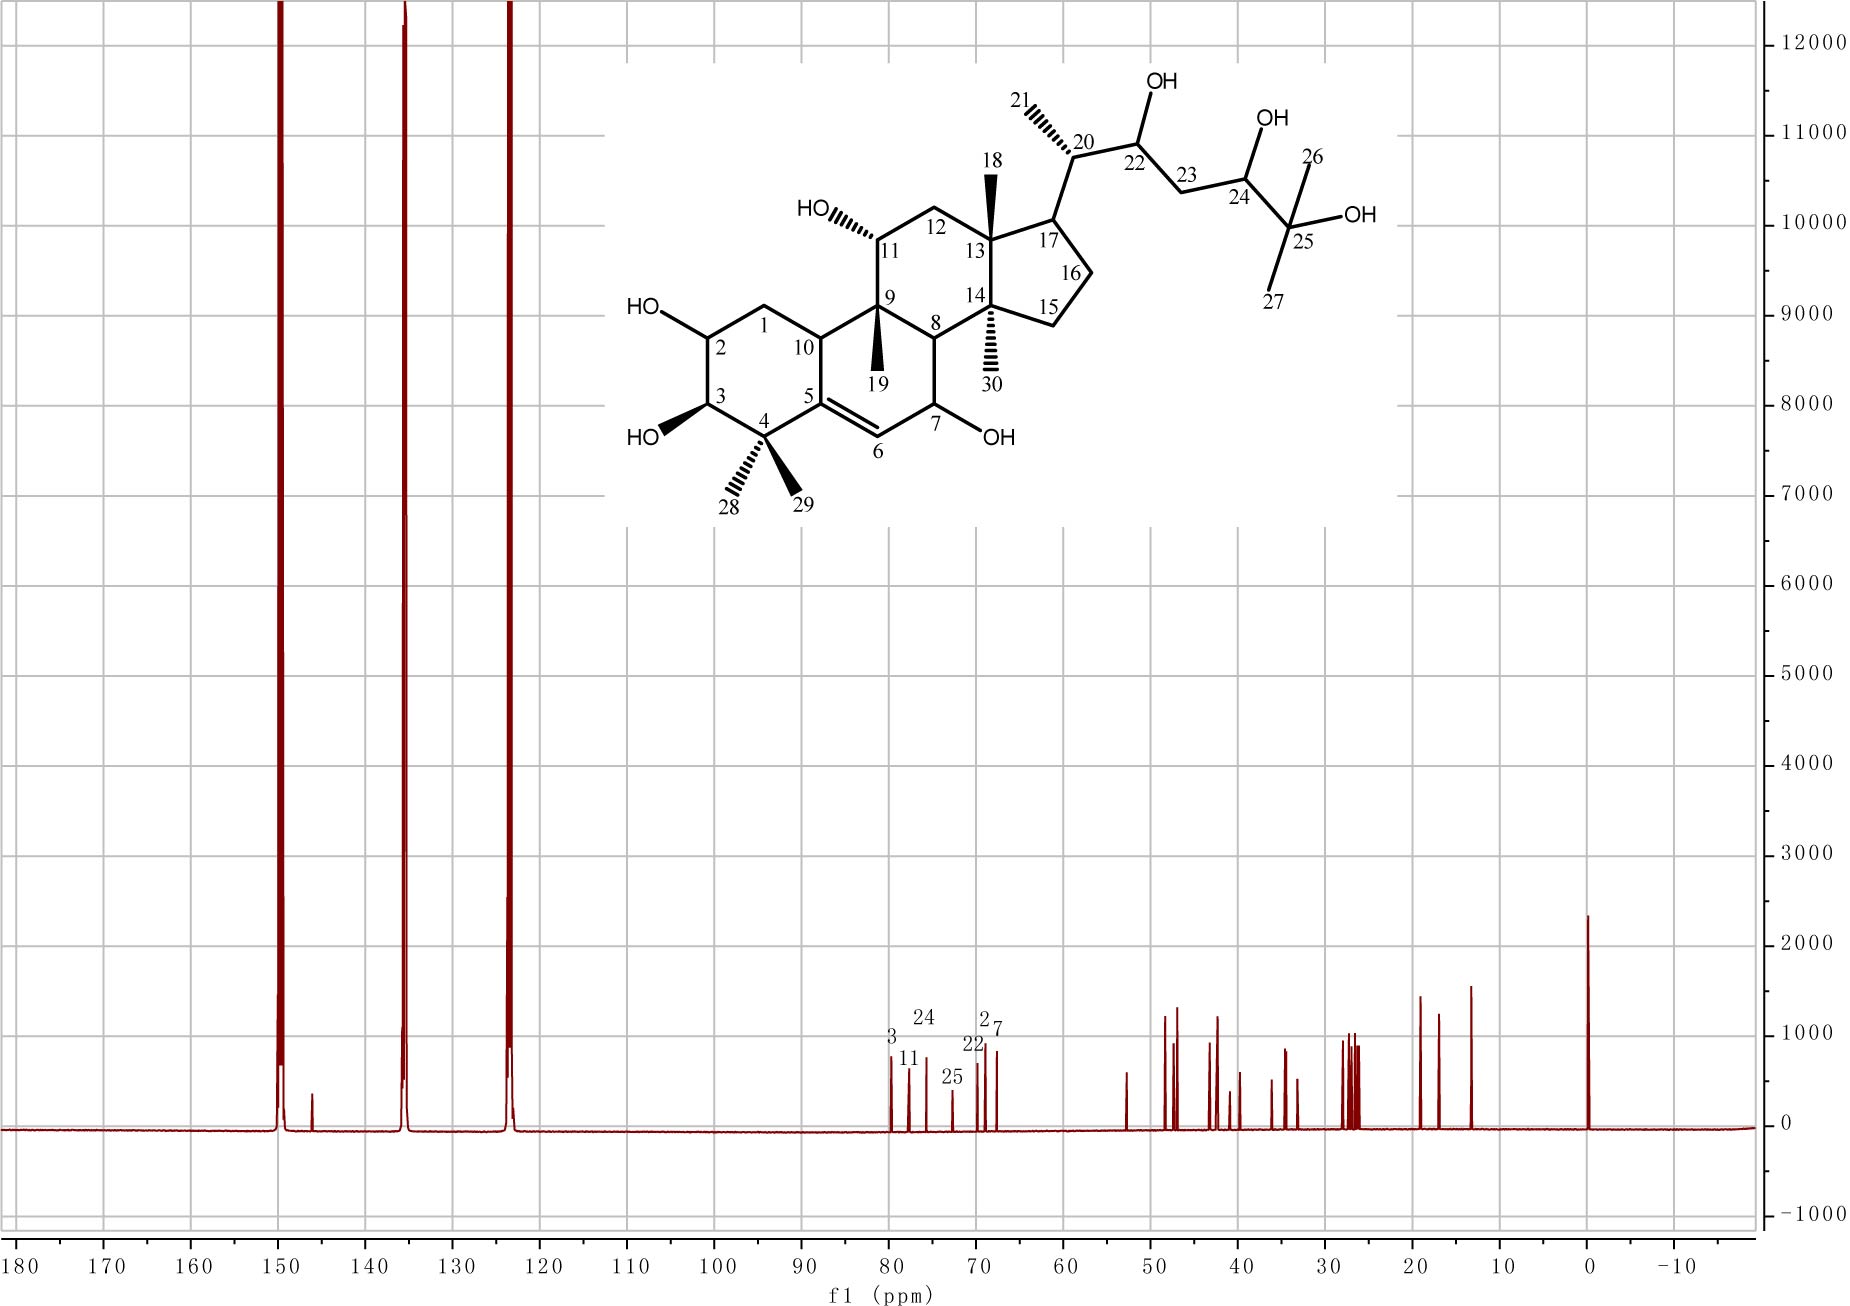


Fig. S3. 13C NMR of compound **2**.


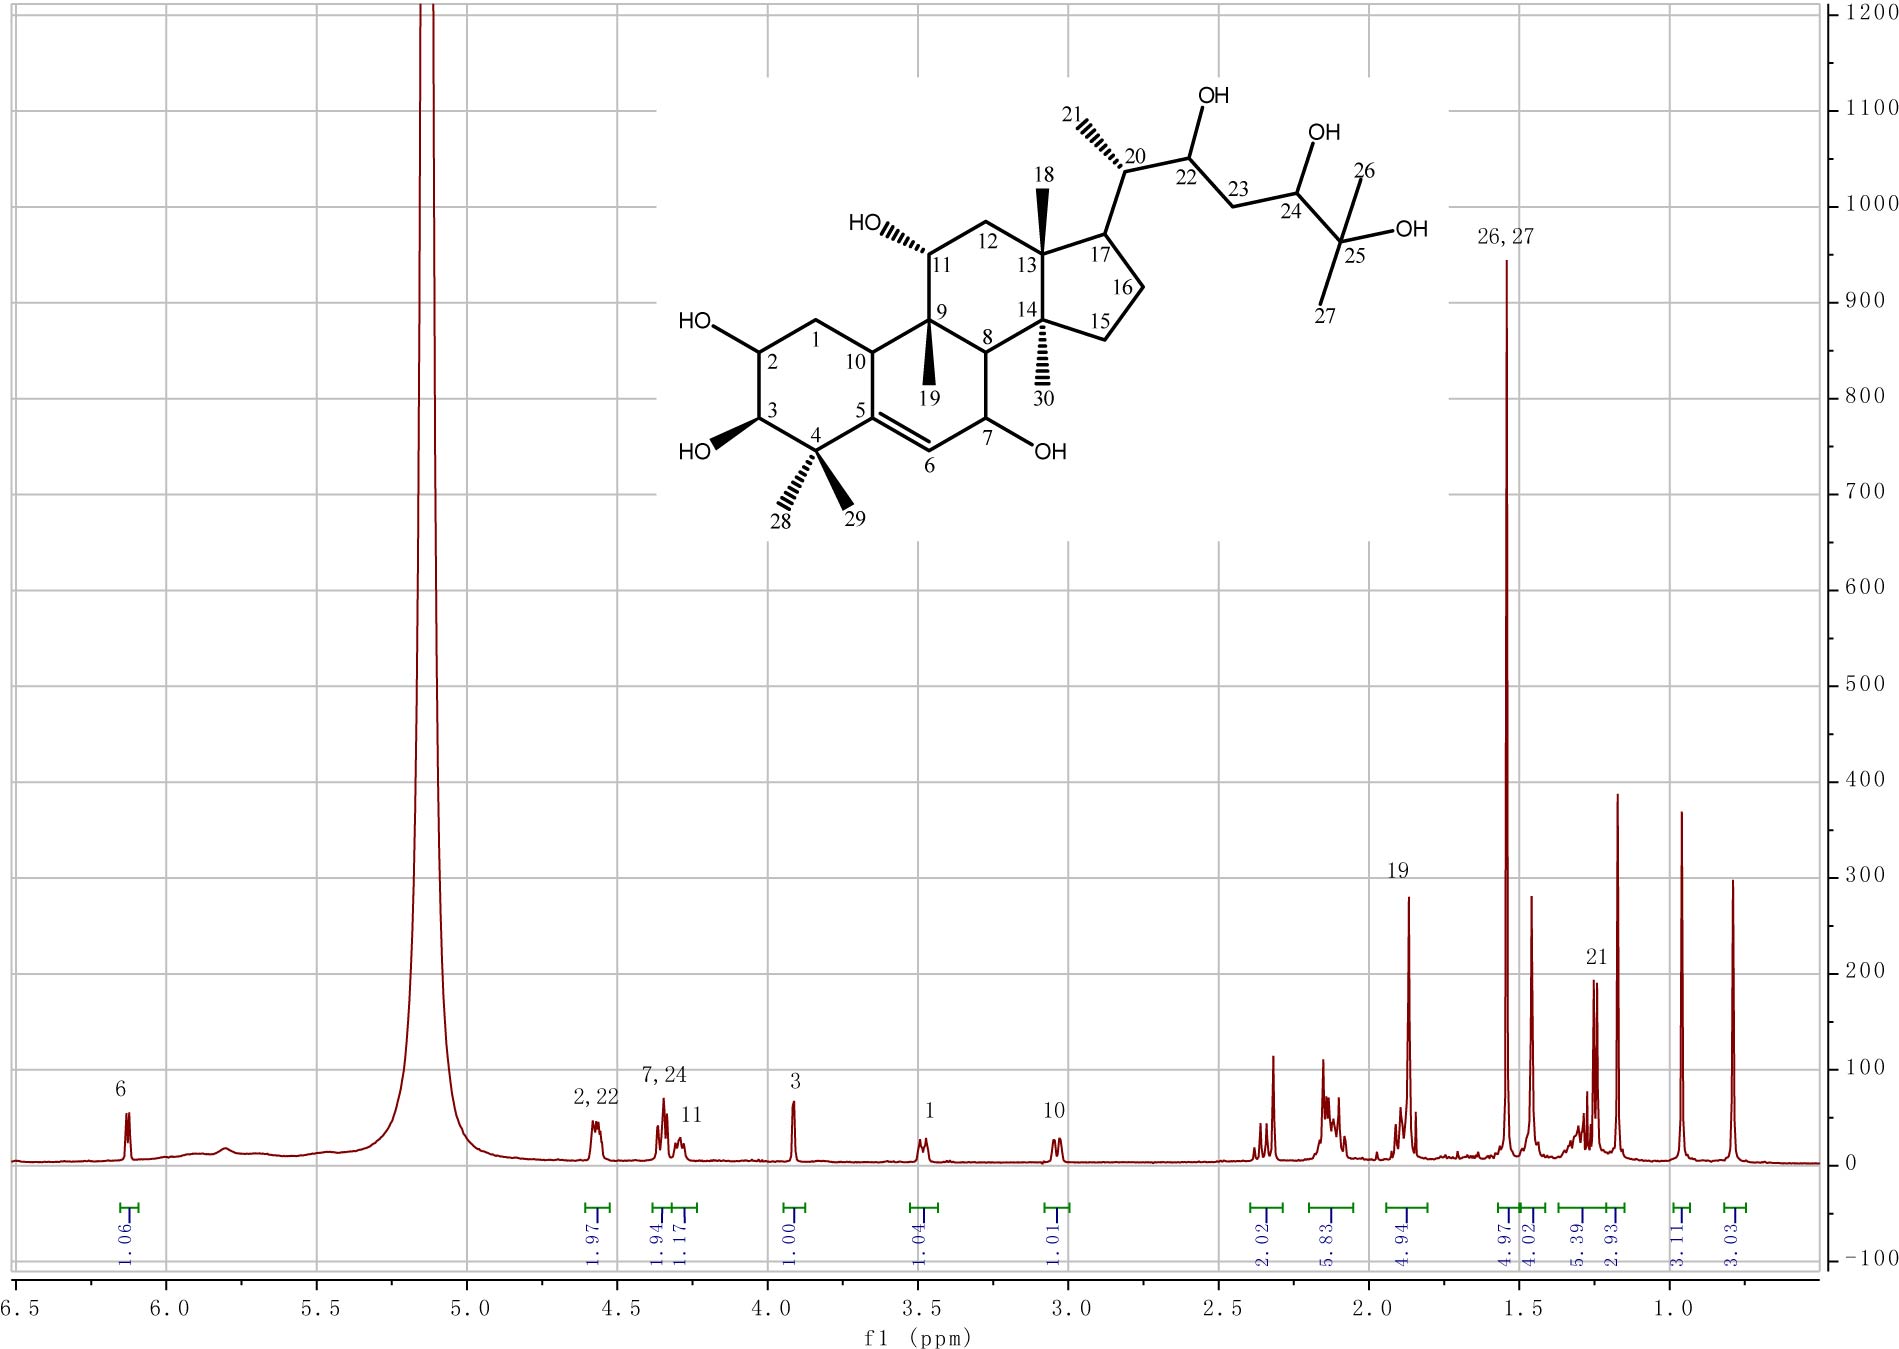


Fig. S4. 1H NMR of compound **2**.


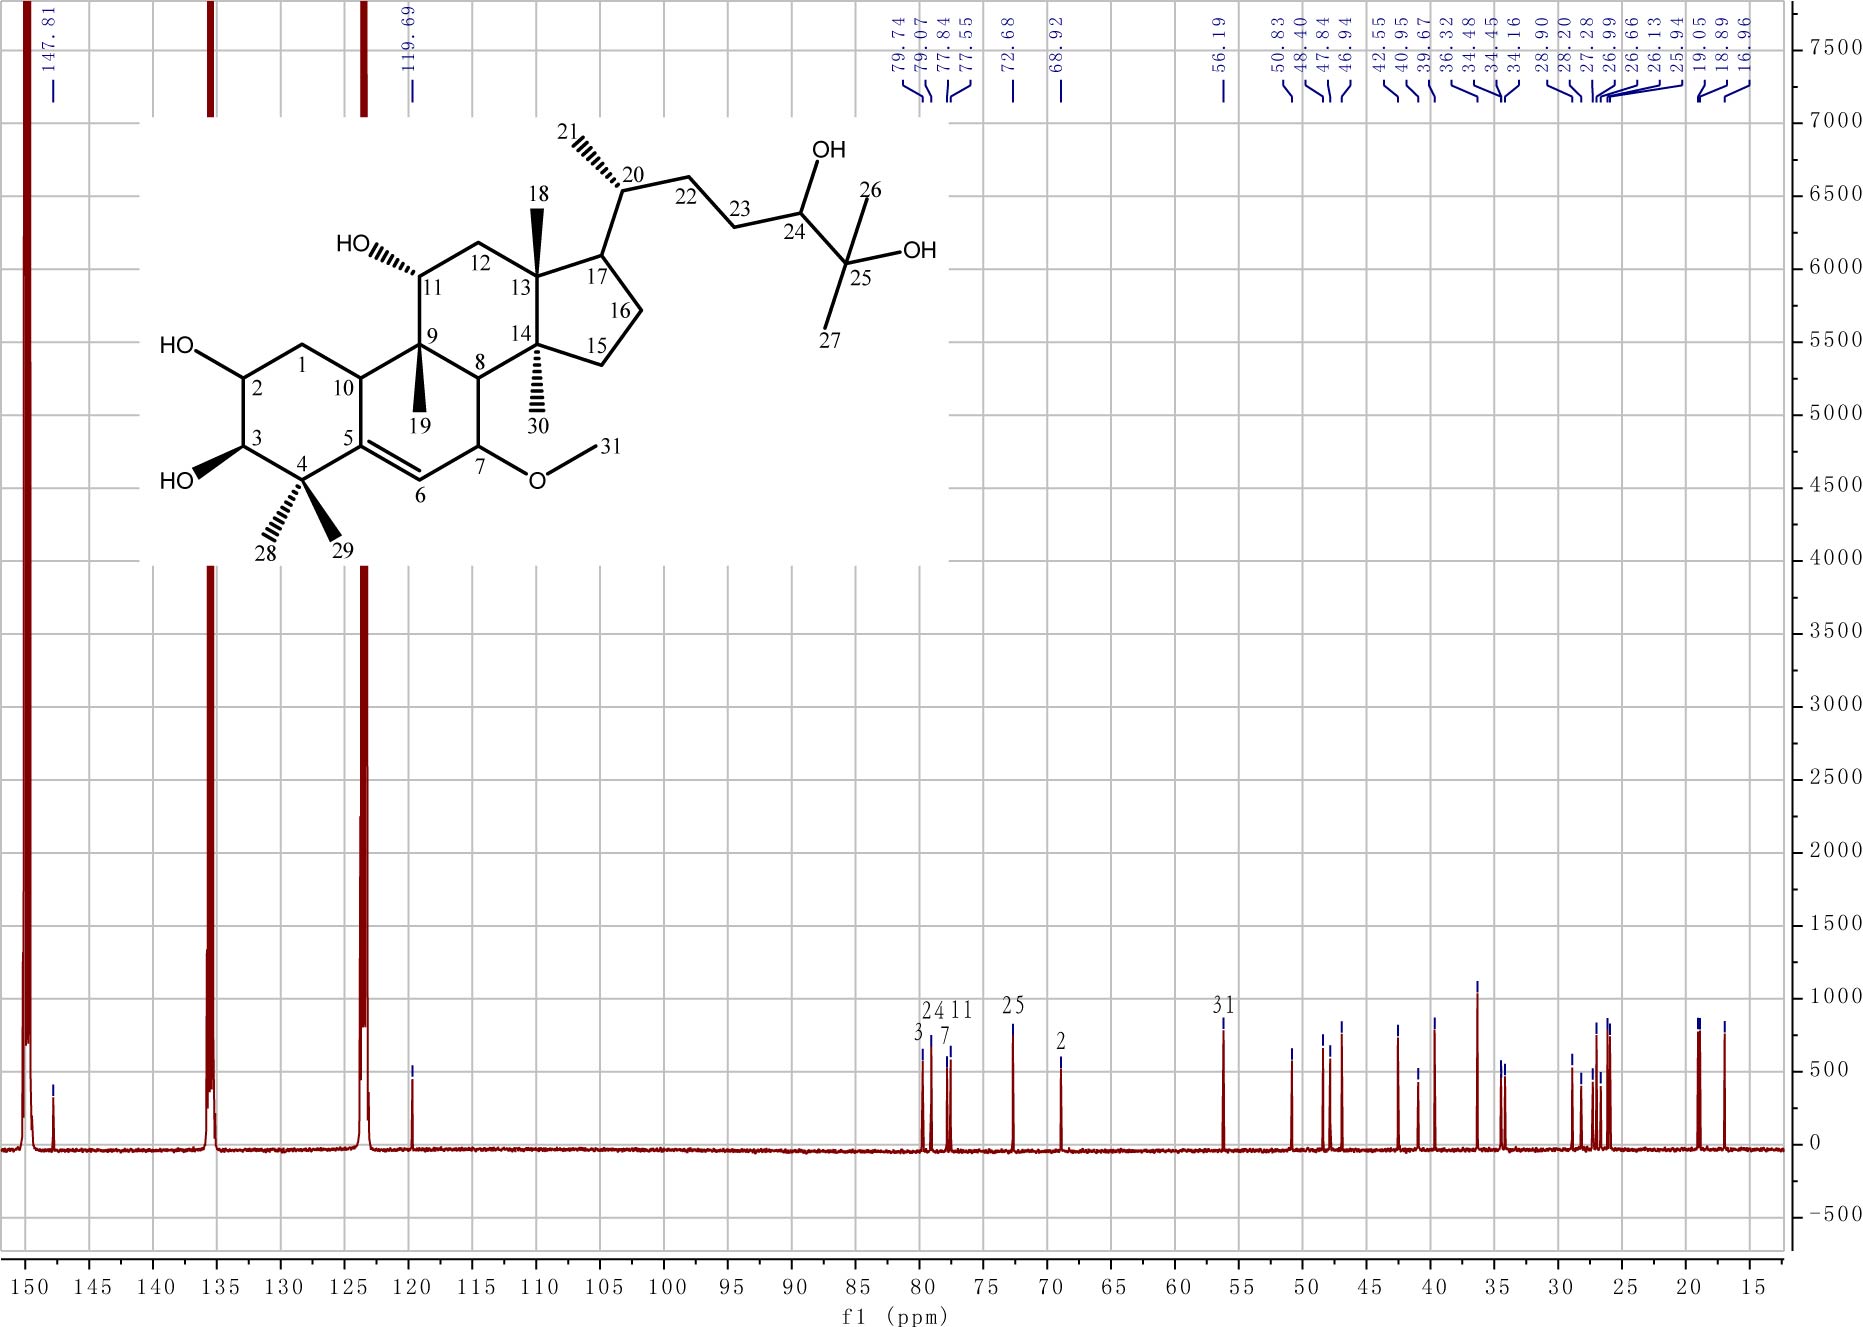


Fig. S5. 13C NMR of compound **3**.


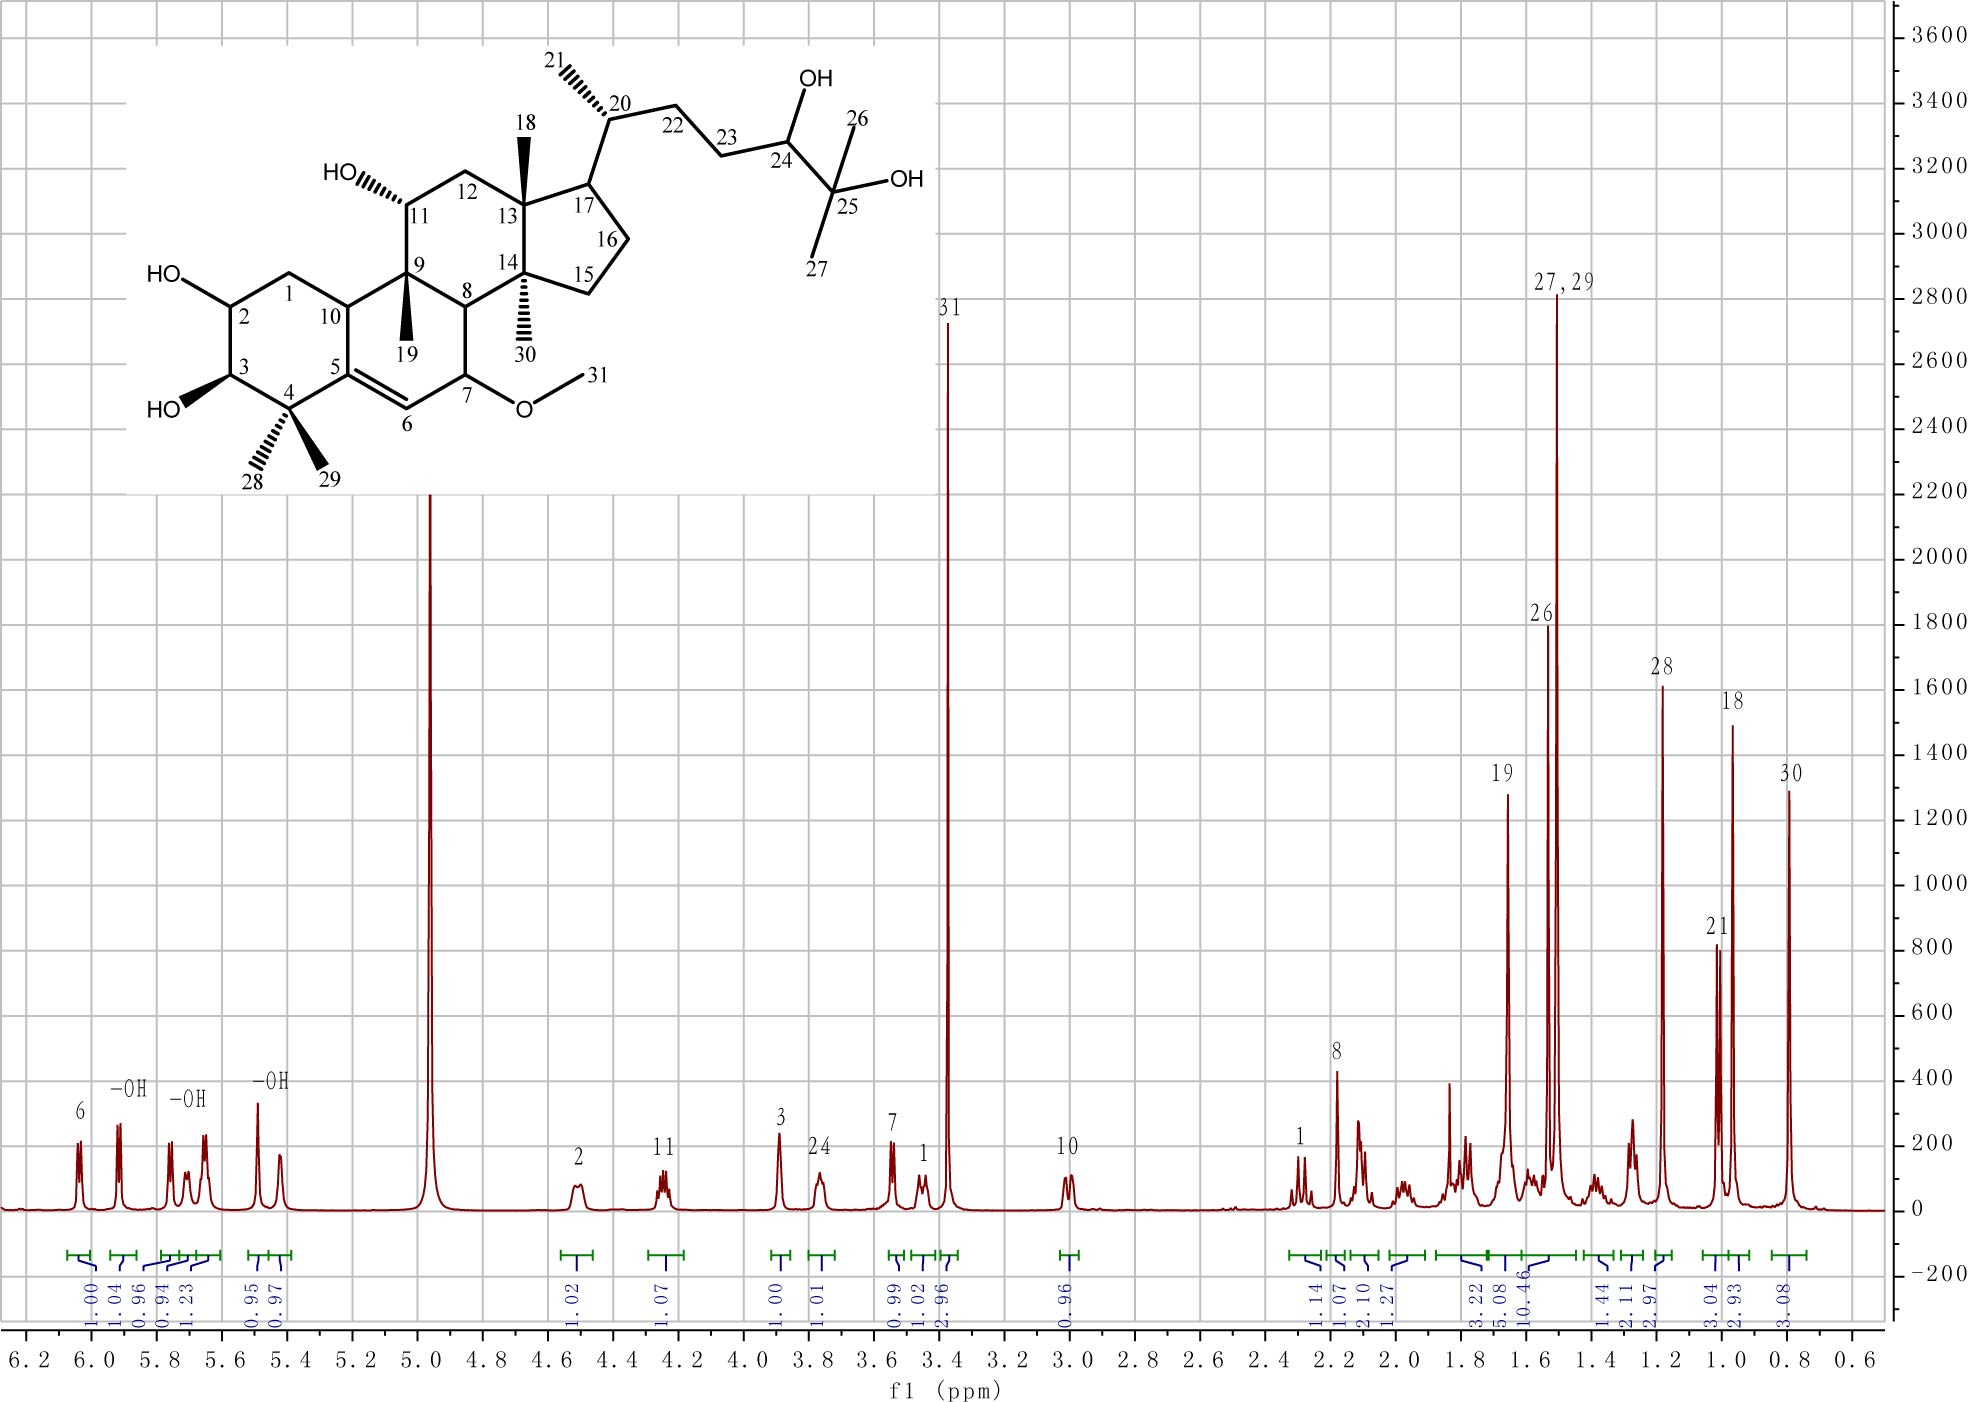


Fig. S6. 1H NMR of compound **3**.


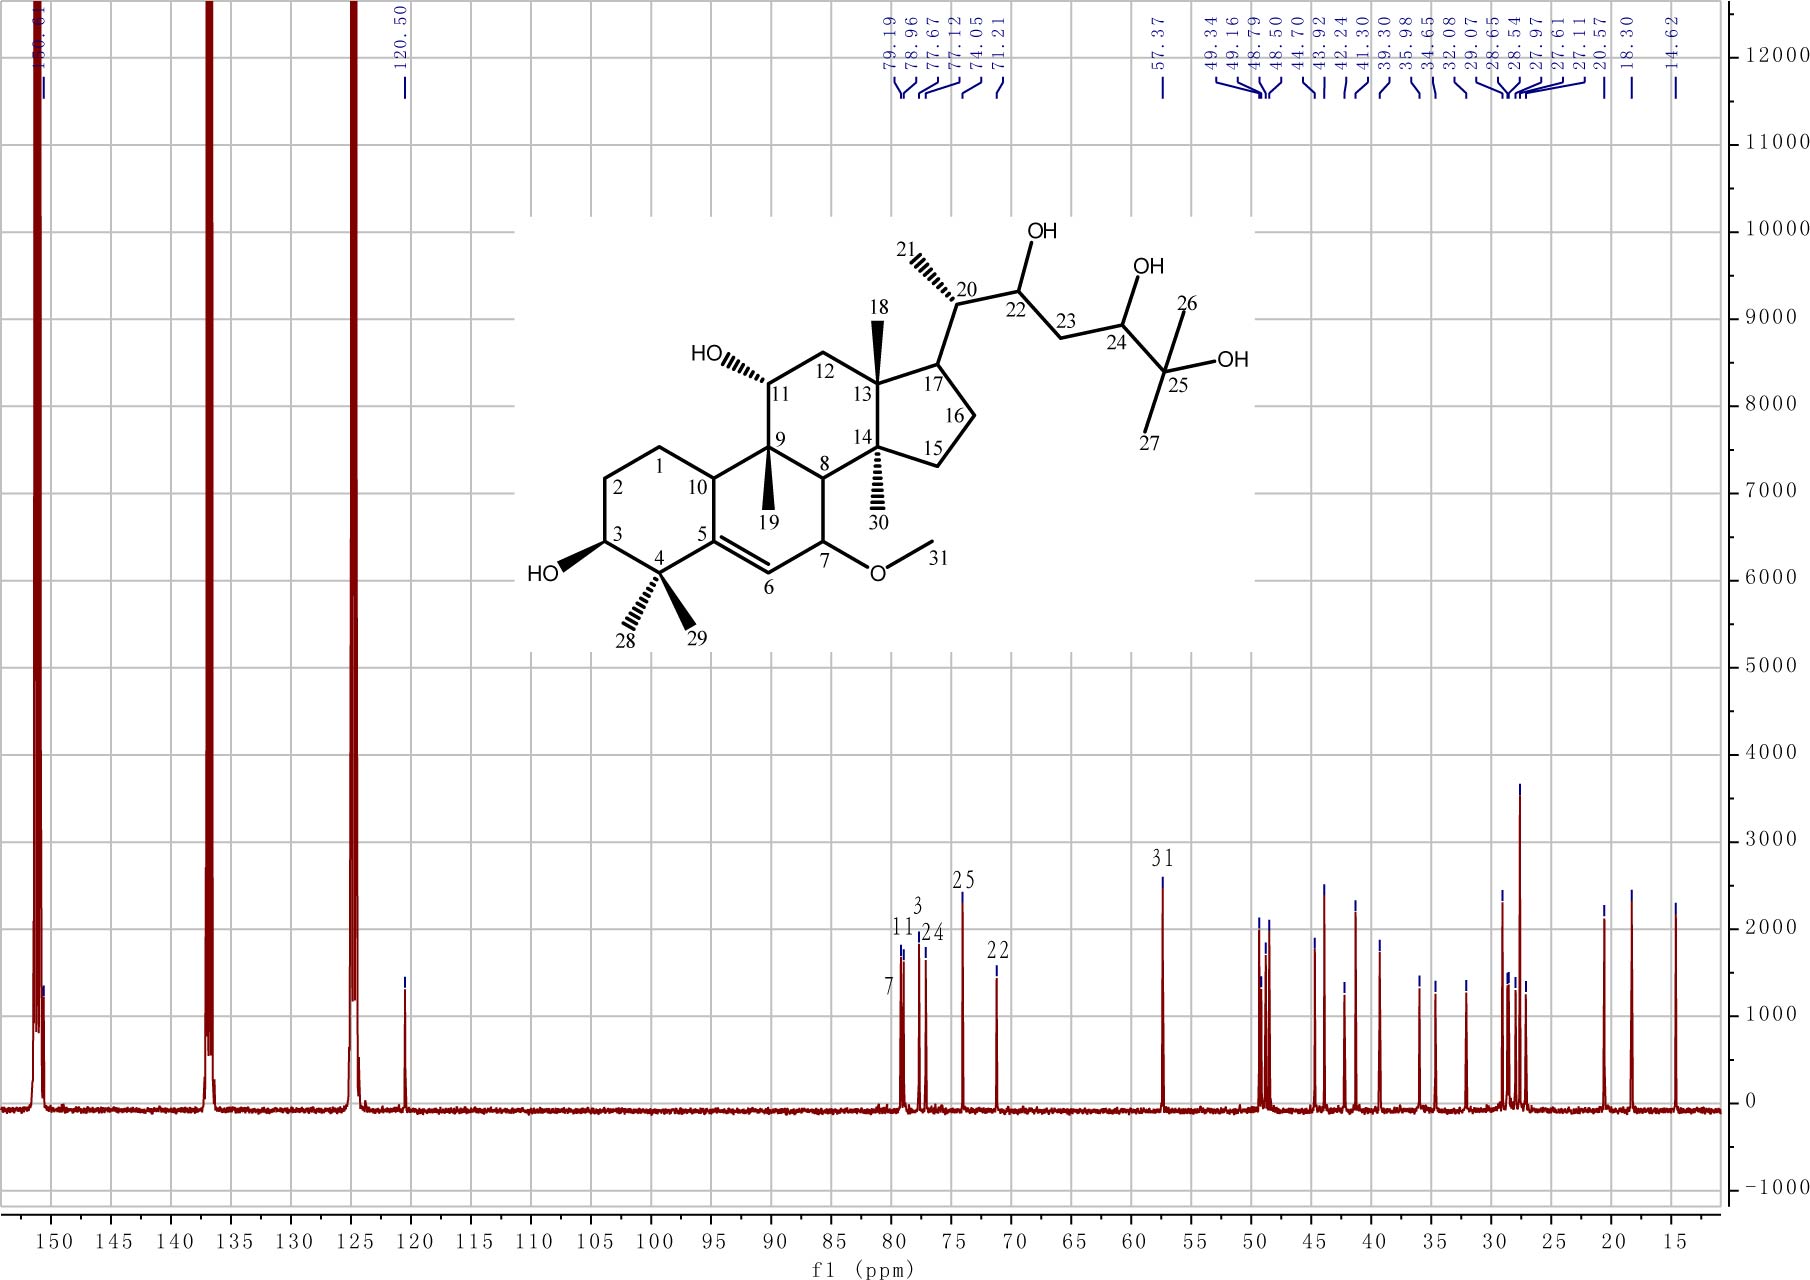


Fig. S7. 13C NMR of compound **4**.


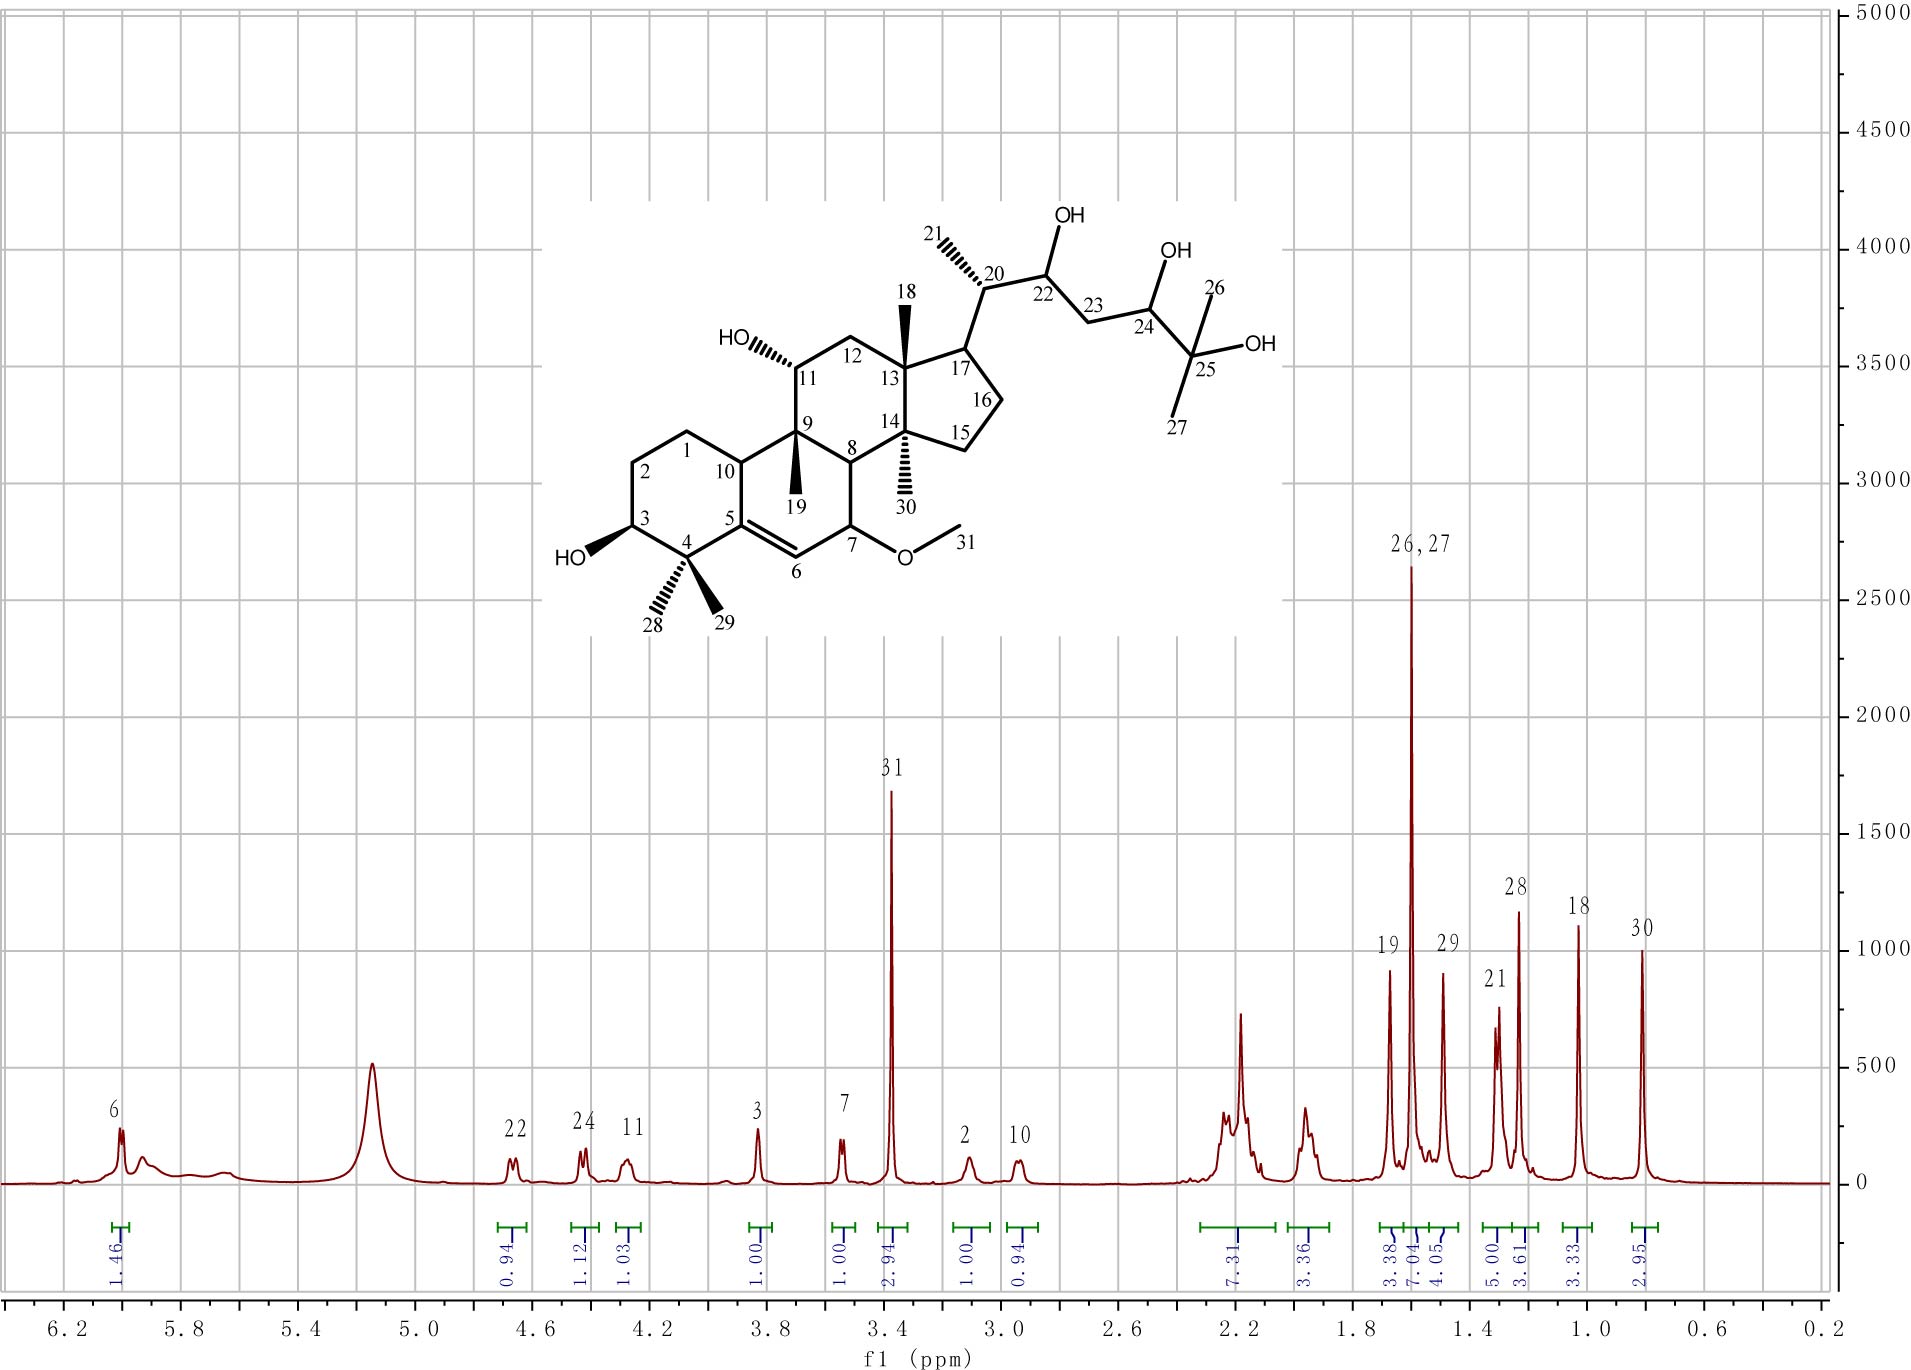


Fig. S8. 1H NMR of compound **4**.


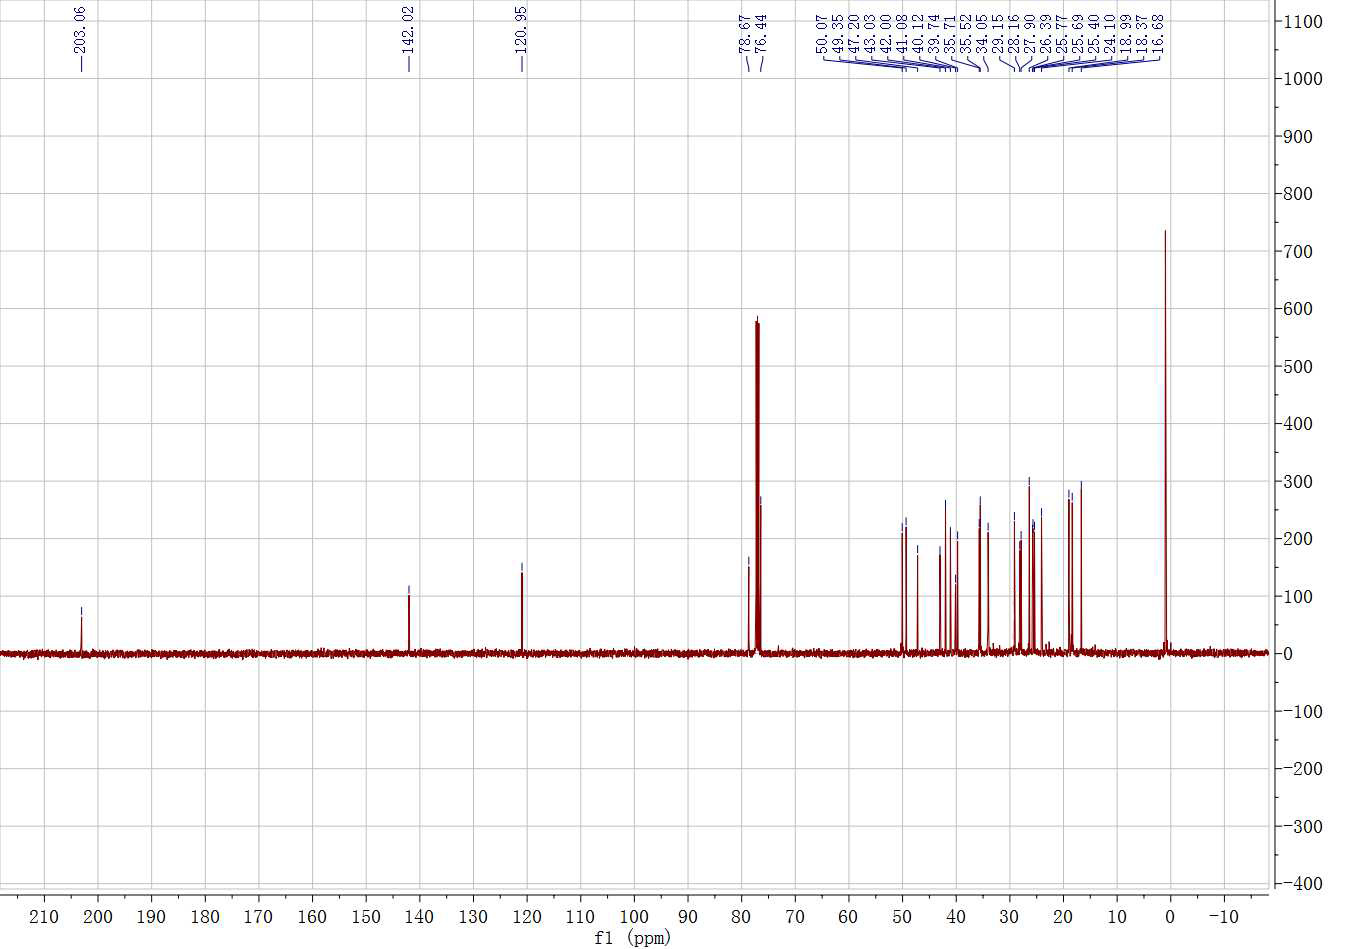


Fig. S9. 13C NMR of compound **5**.


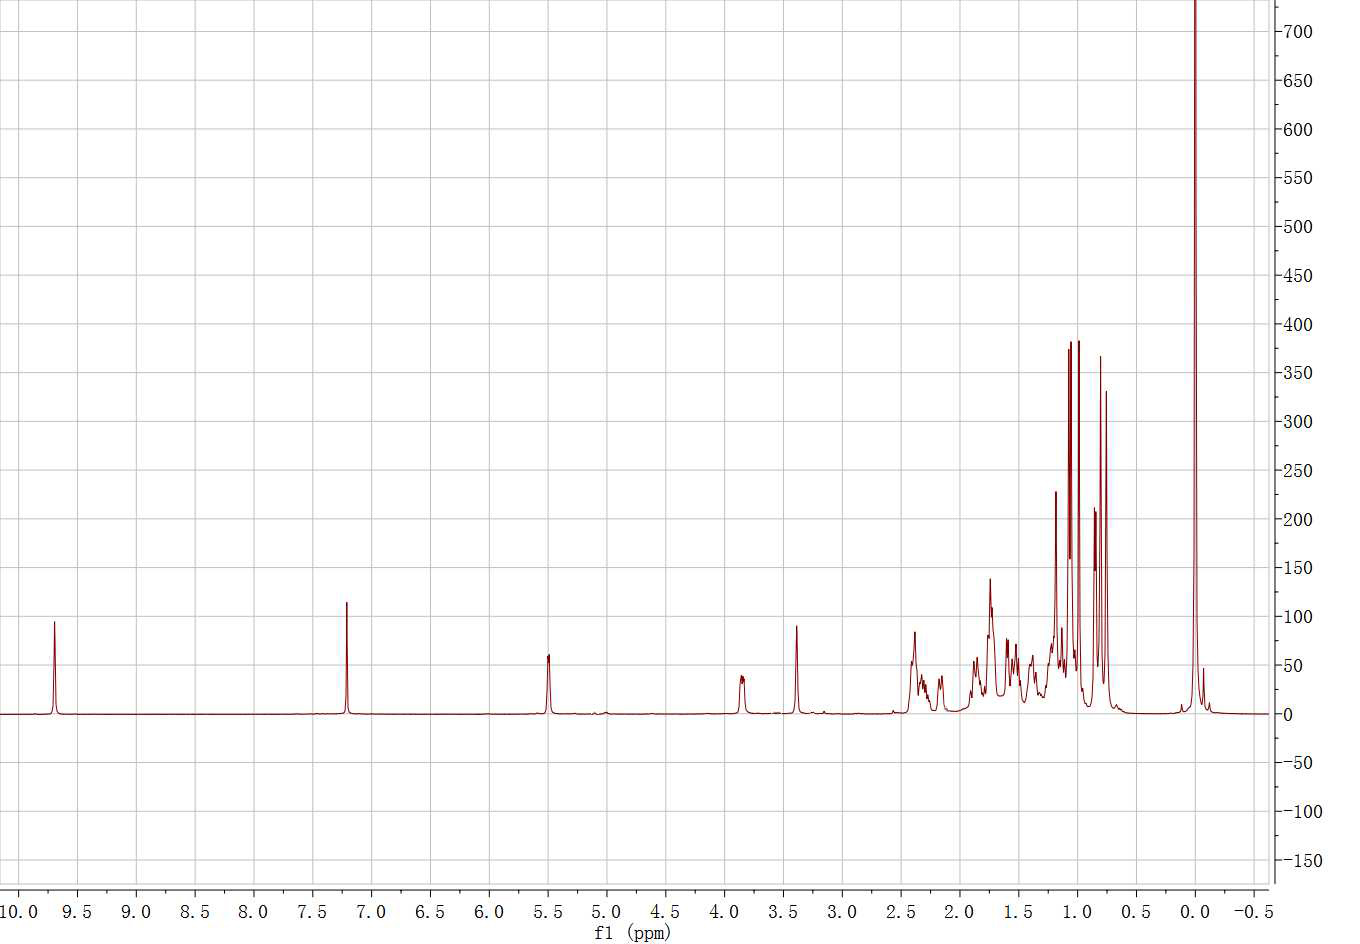


Fig. S10. 1H NMR of compound **5**.


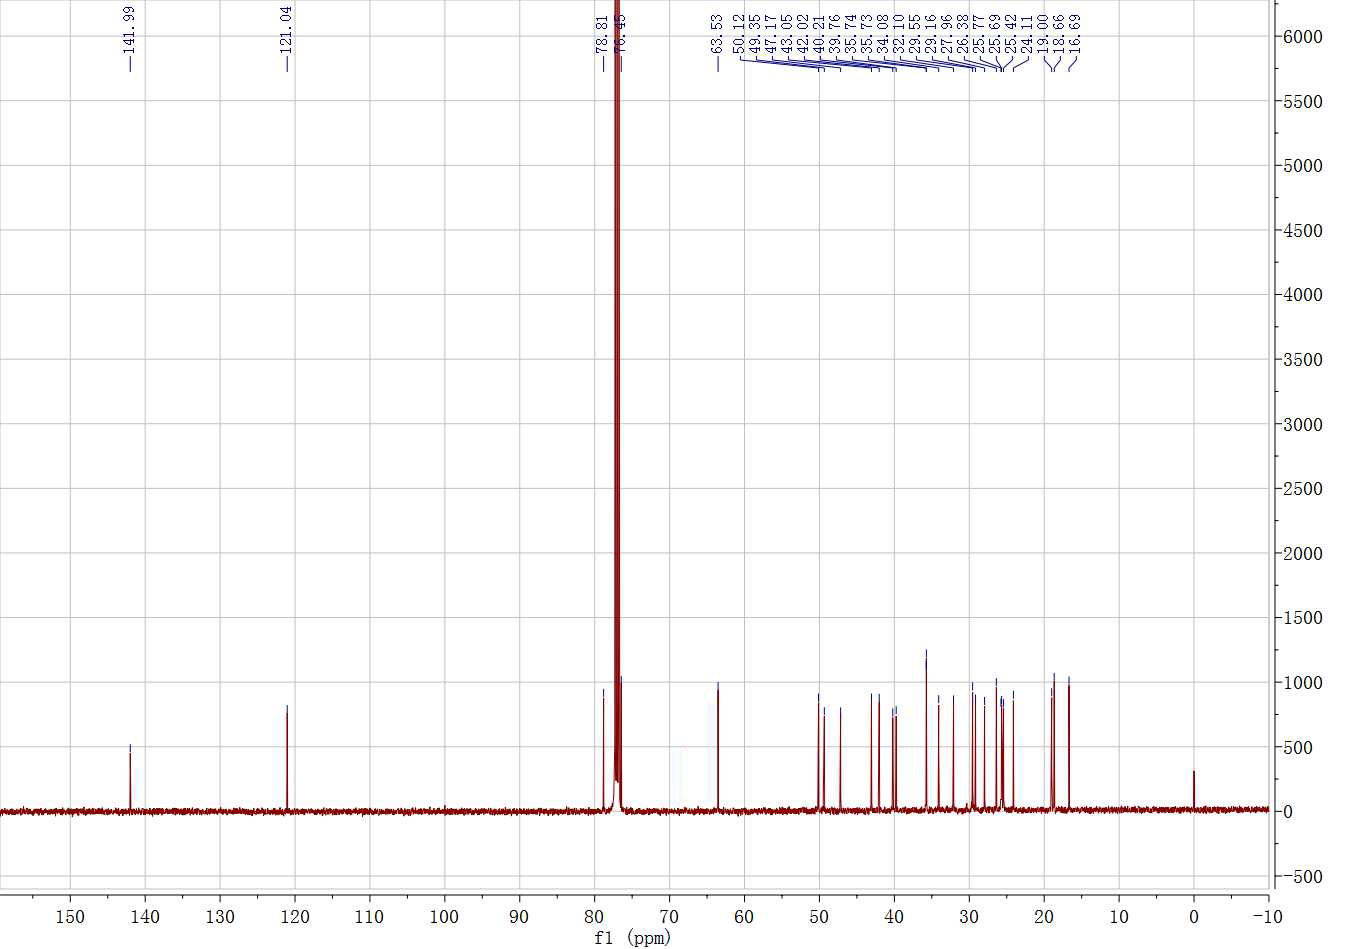


Fig. S11. 13C NMR of compound **6**.


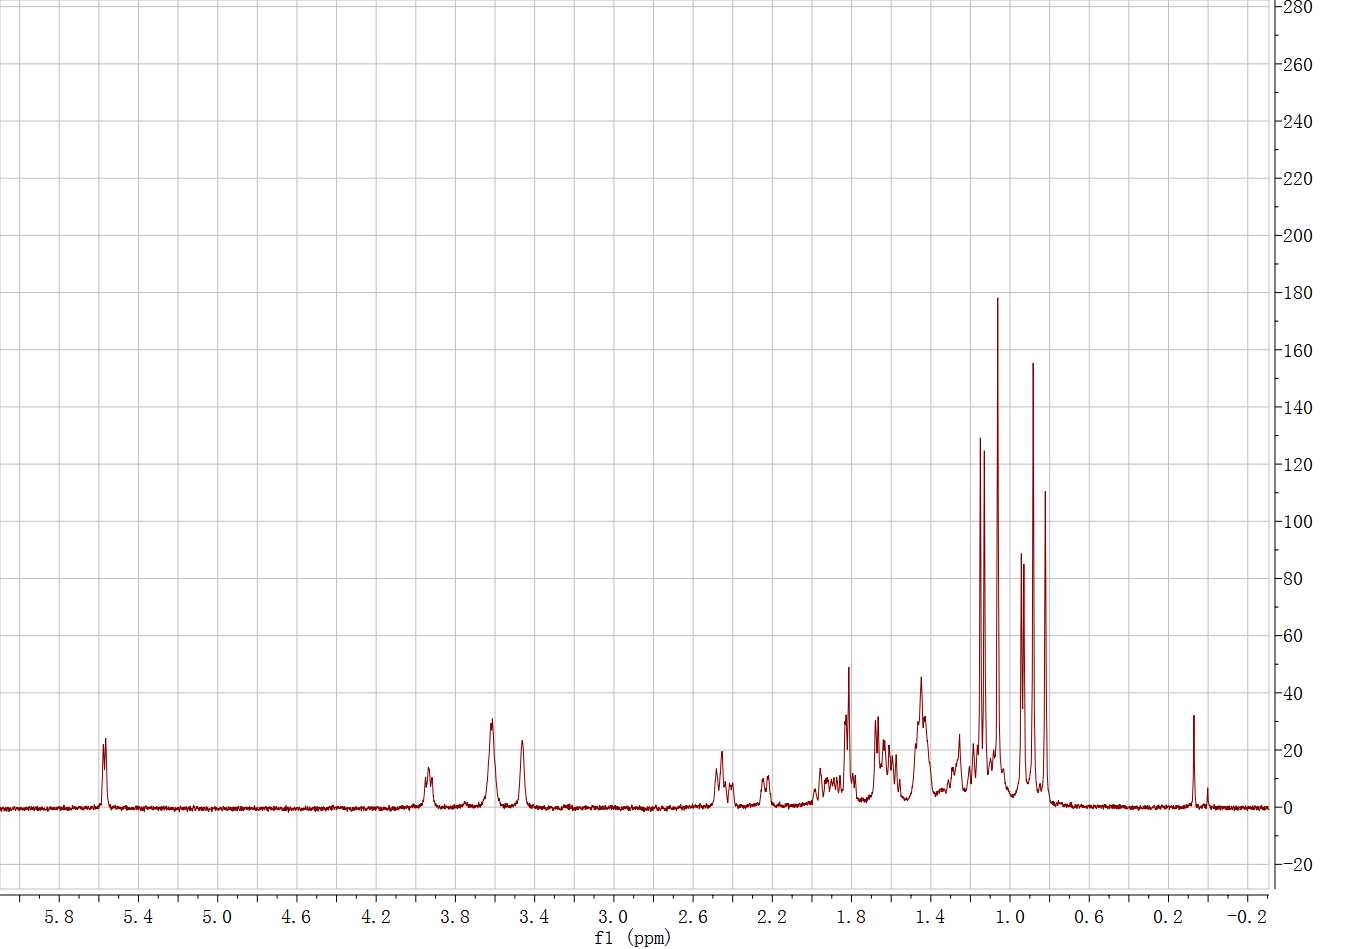


Fig. S12. 1H NMR of compound **6**.


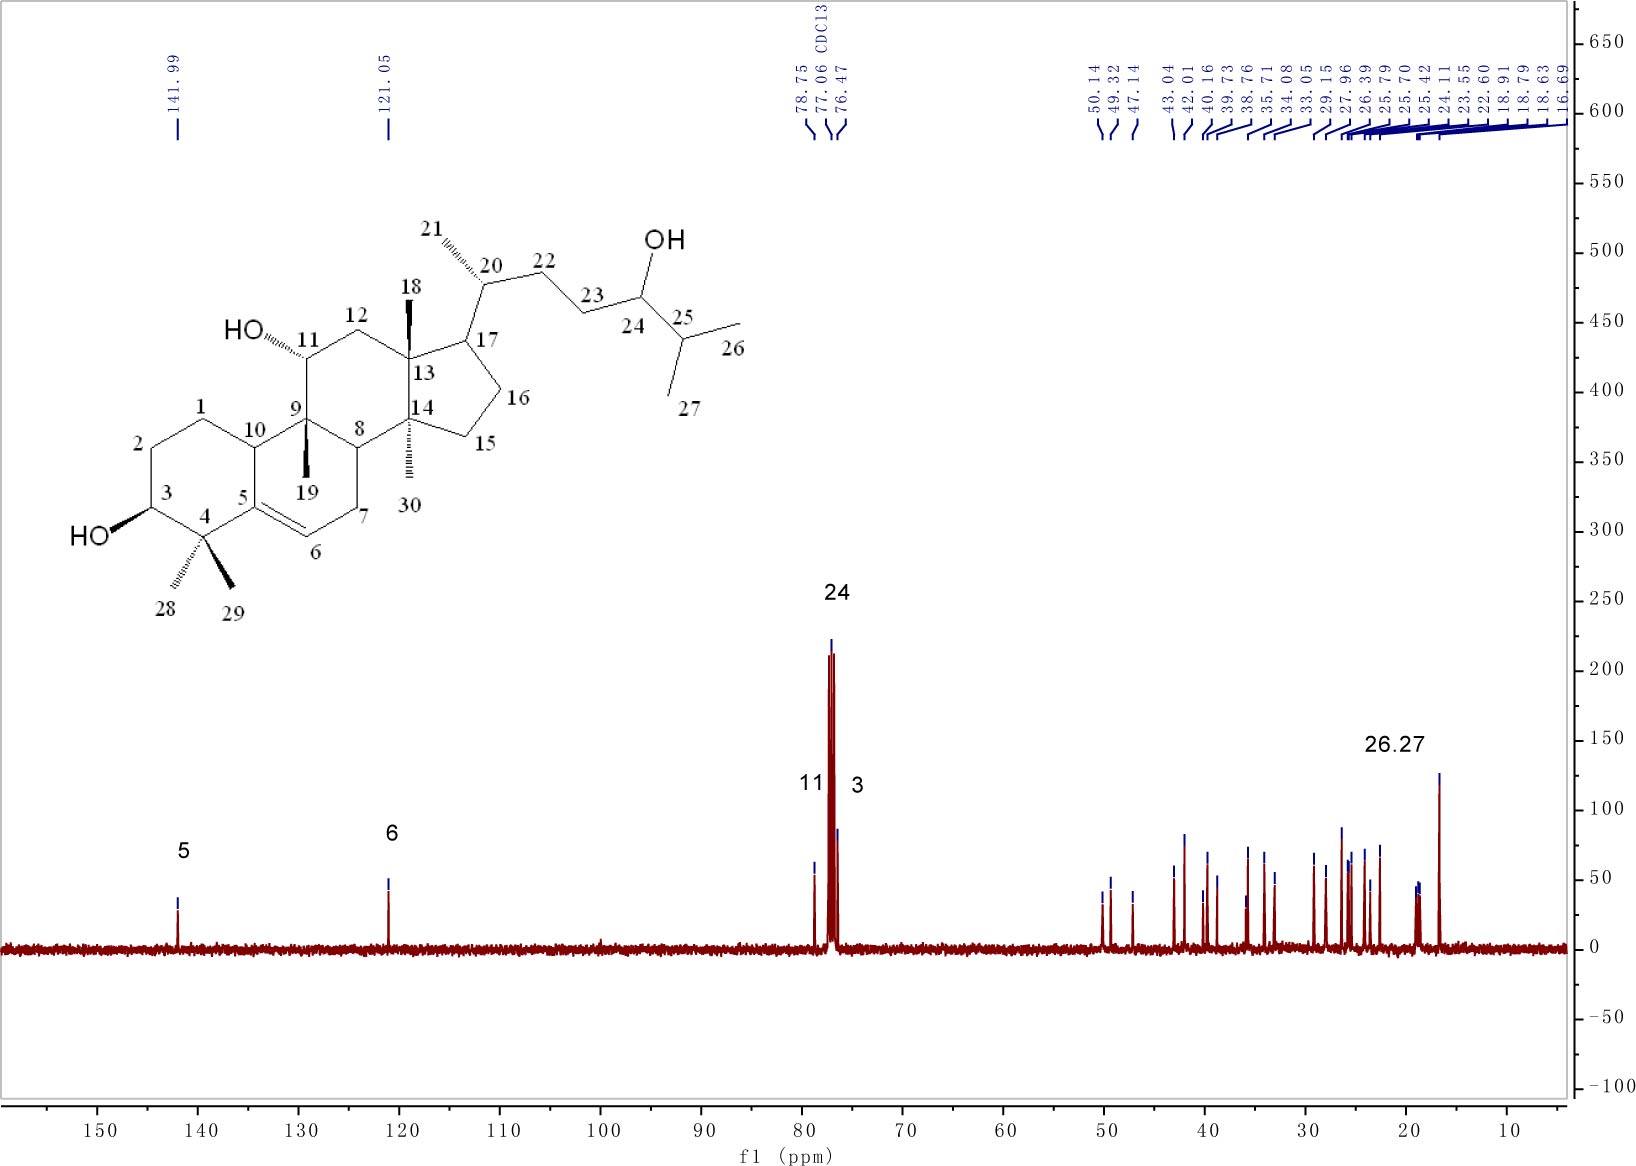


Fig. S25. 13C NMR of compound **7**.


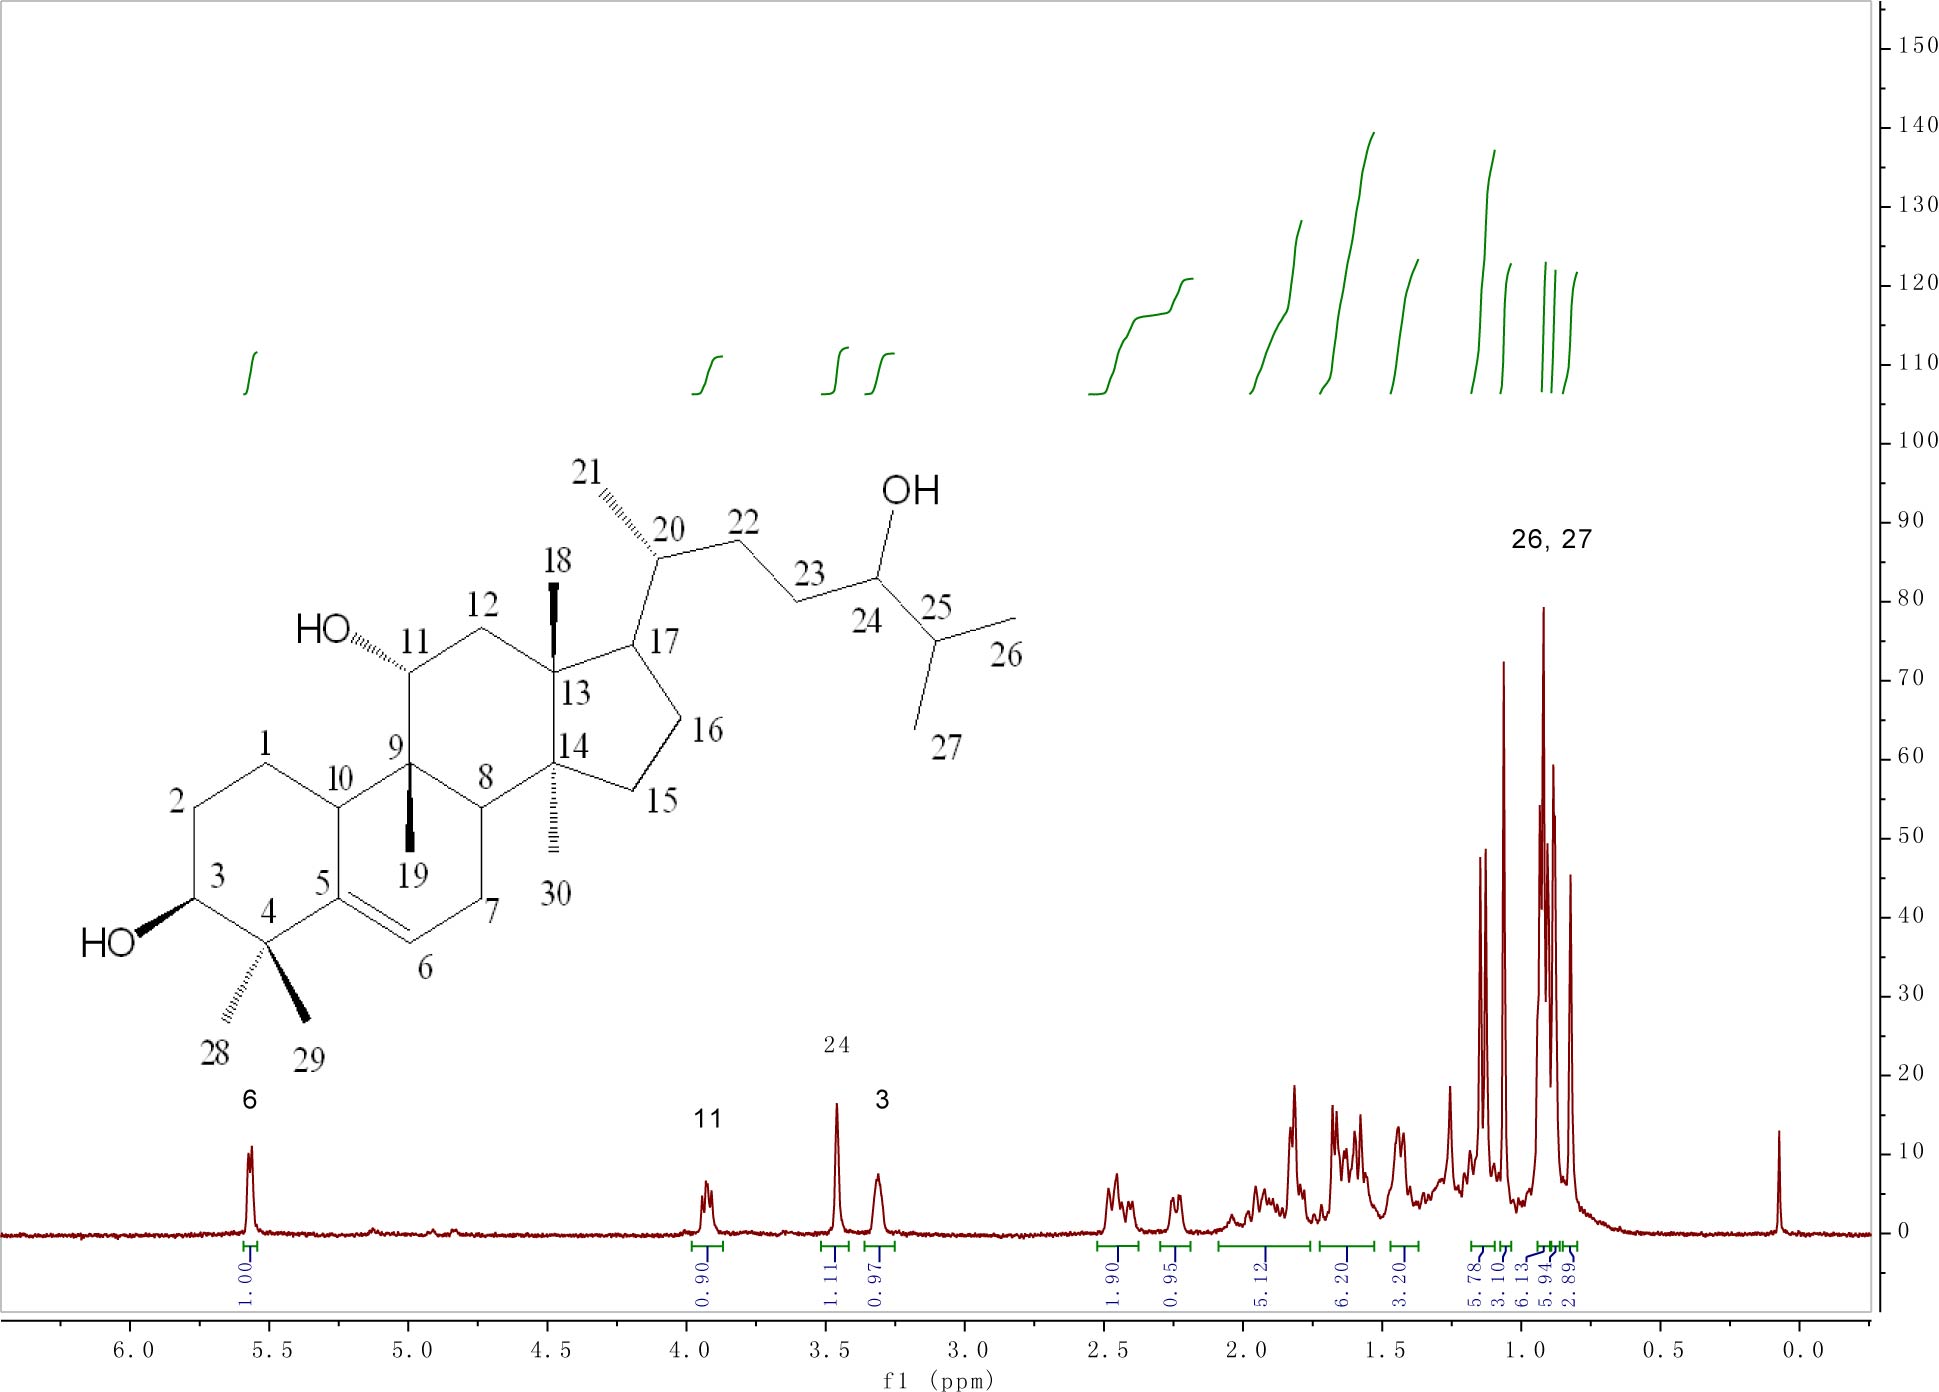


Fig. S26. 1H NMR of compound **7**.


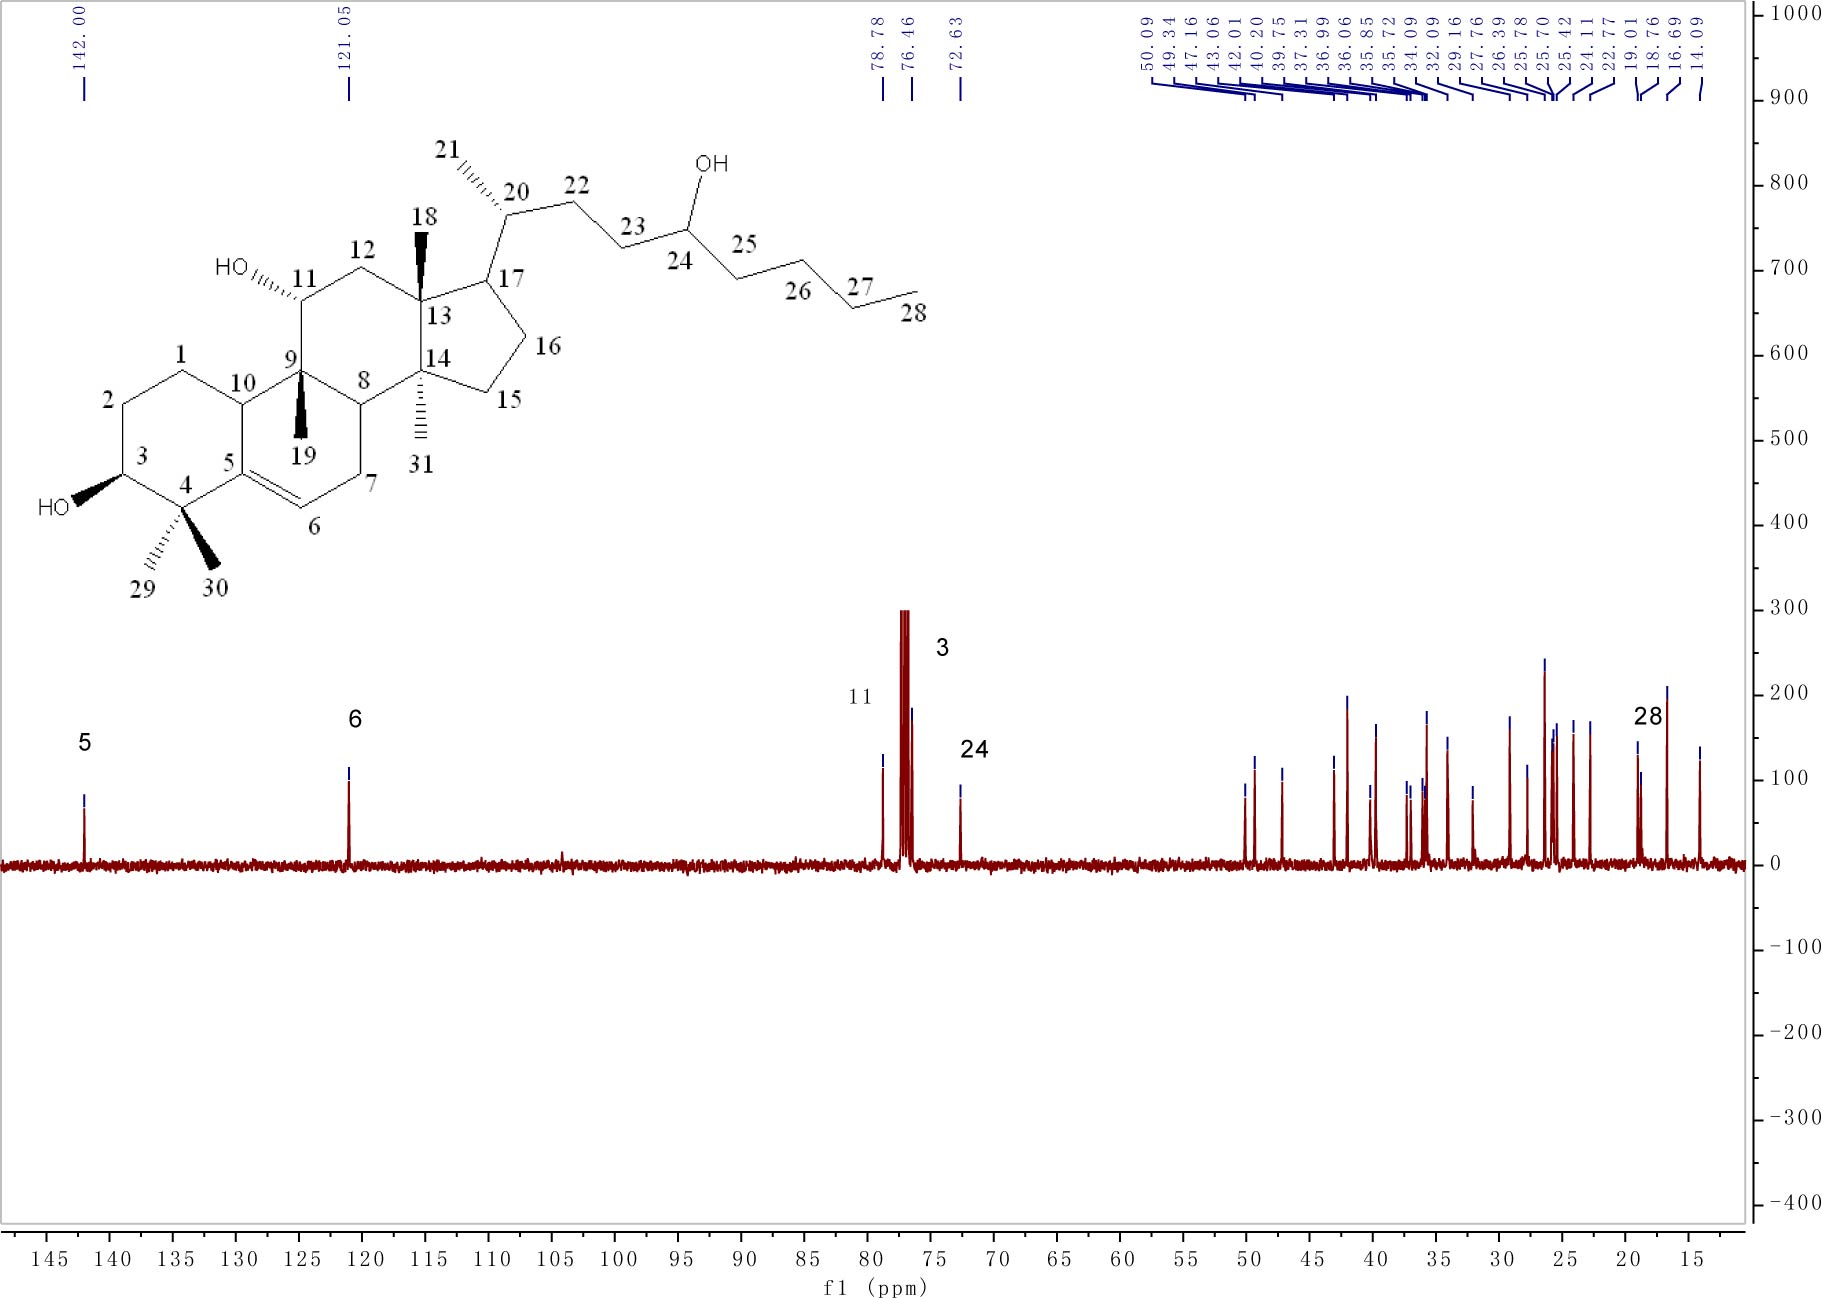


Fig. S27. 13C NMR of compound **8**.


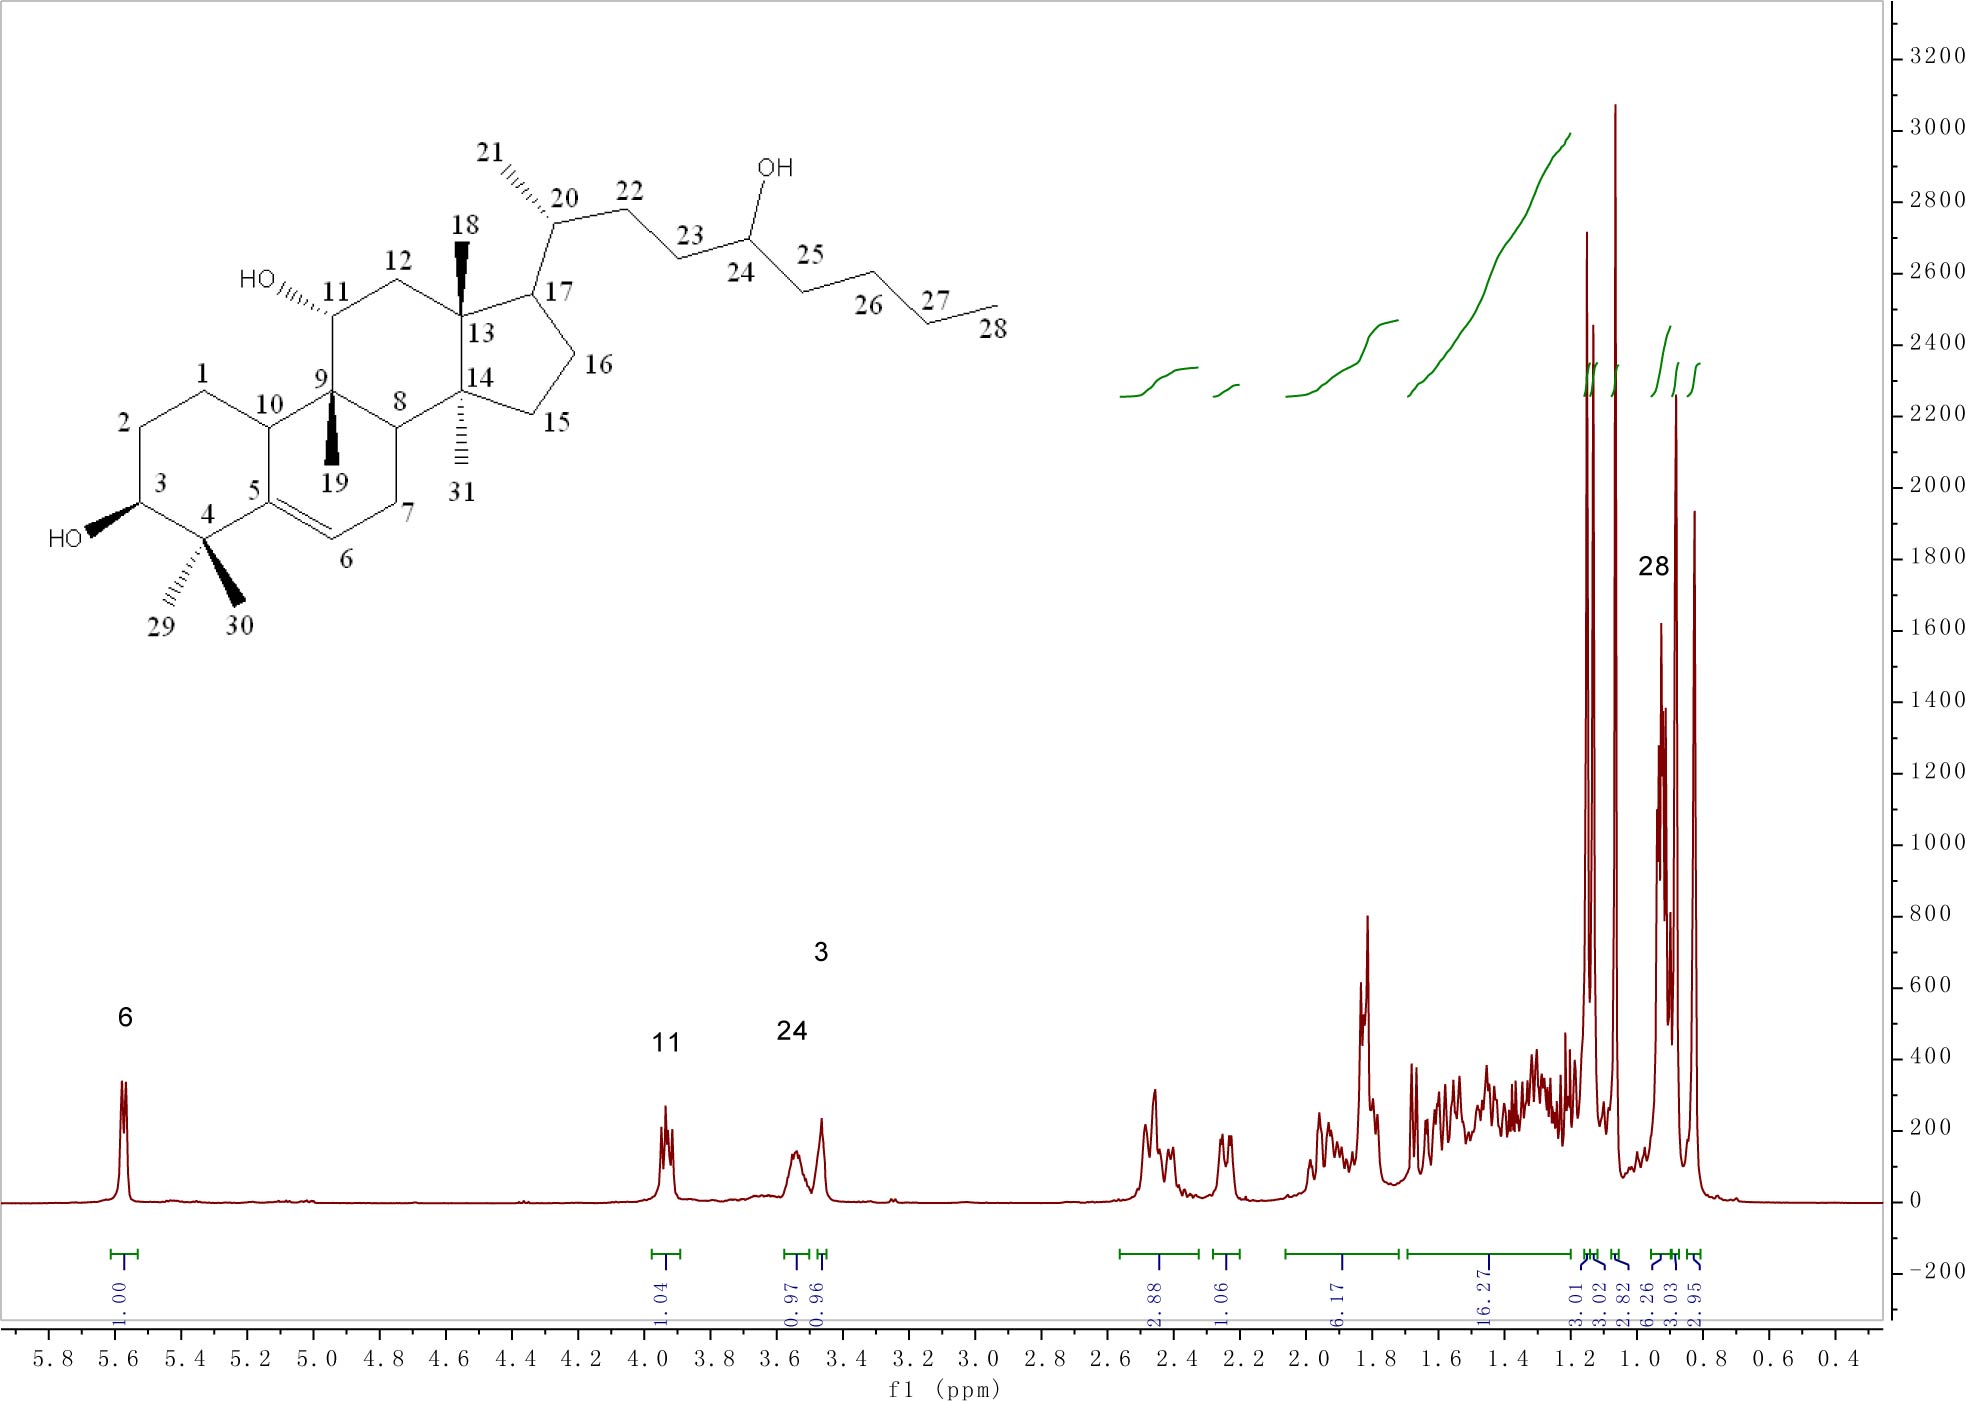


Fig. S28. 1H NMR of compound **8**.


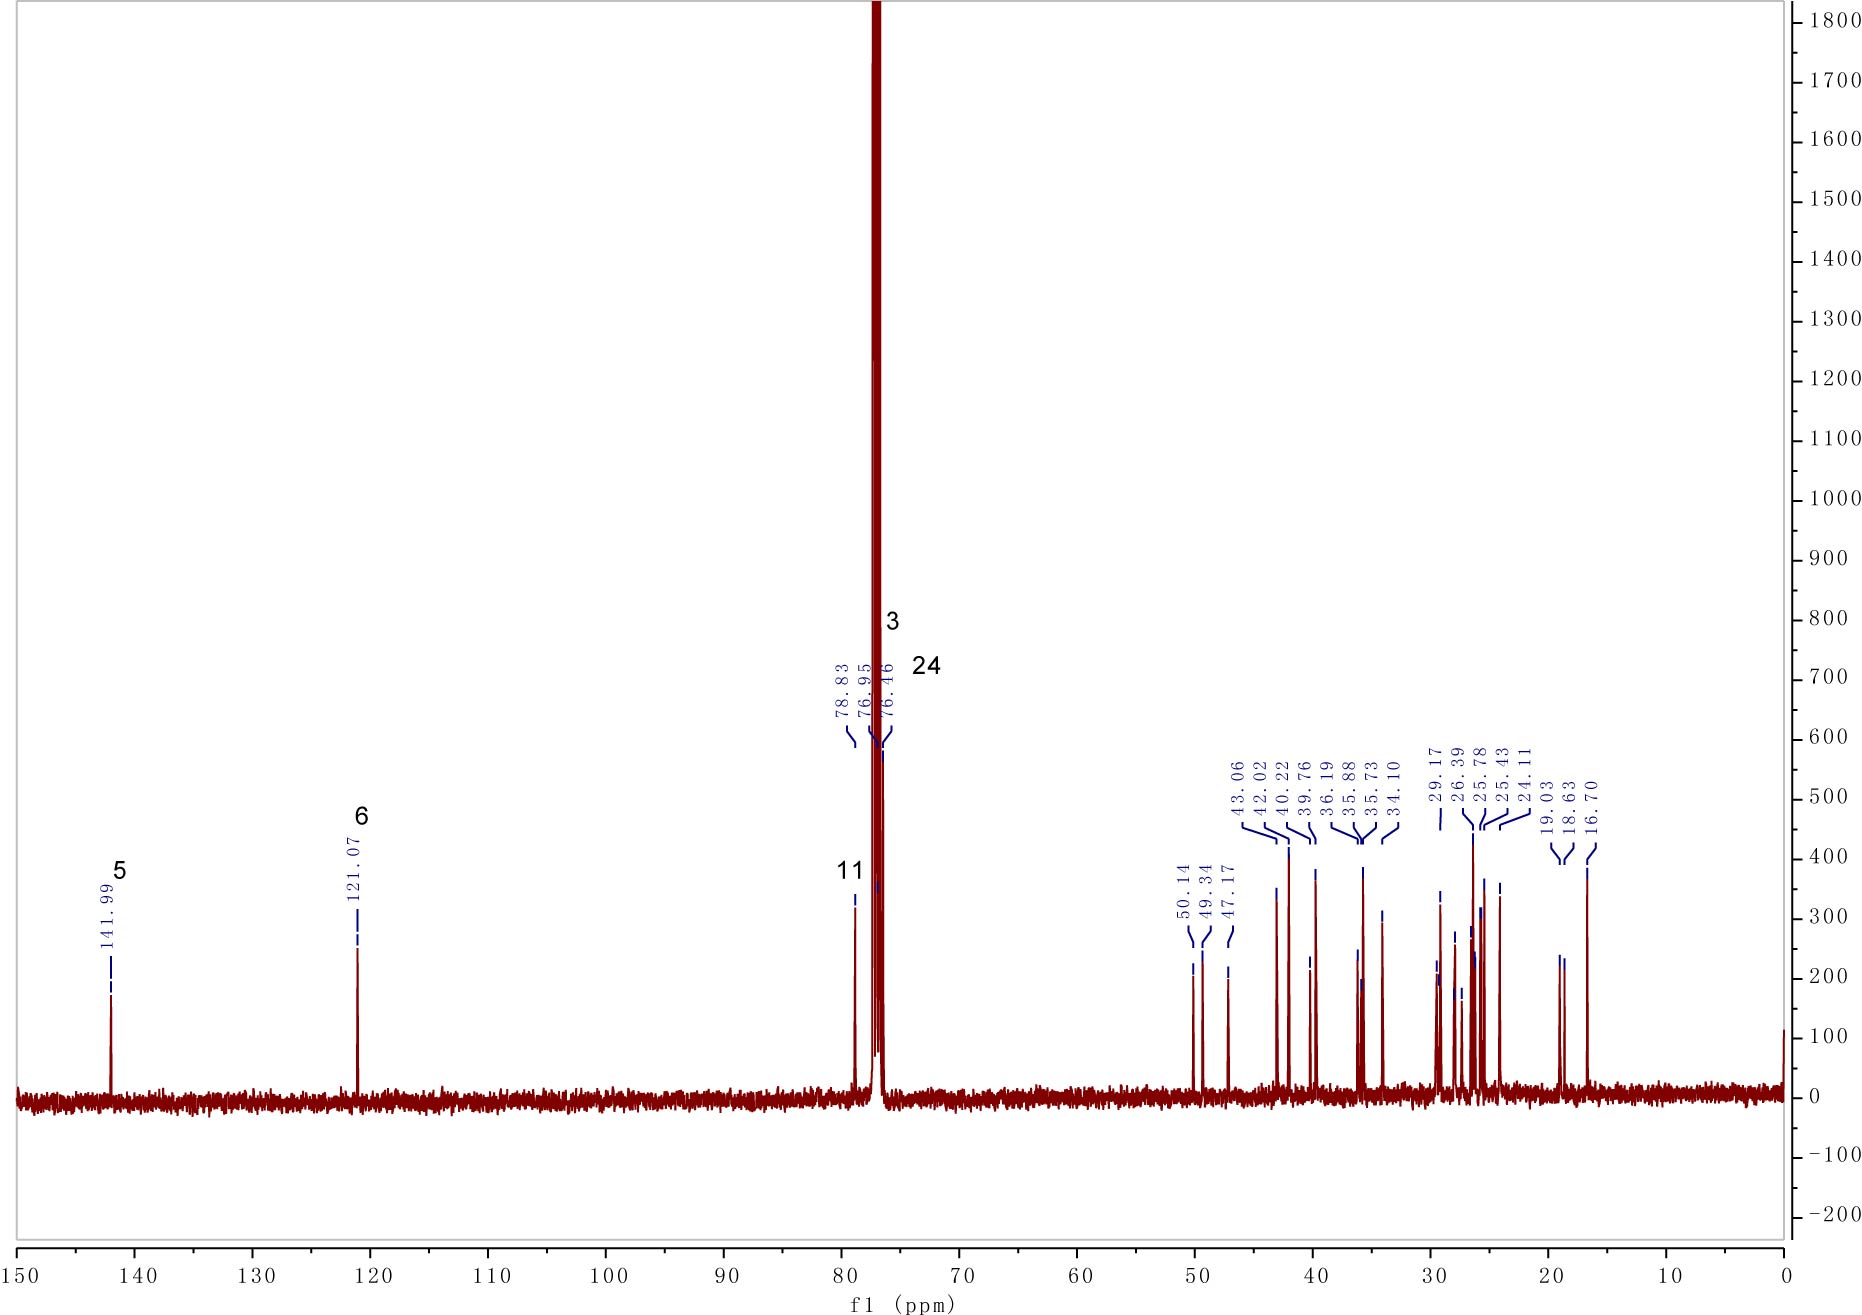


Fig. S29. 13C NMR of compound **9**.


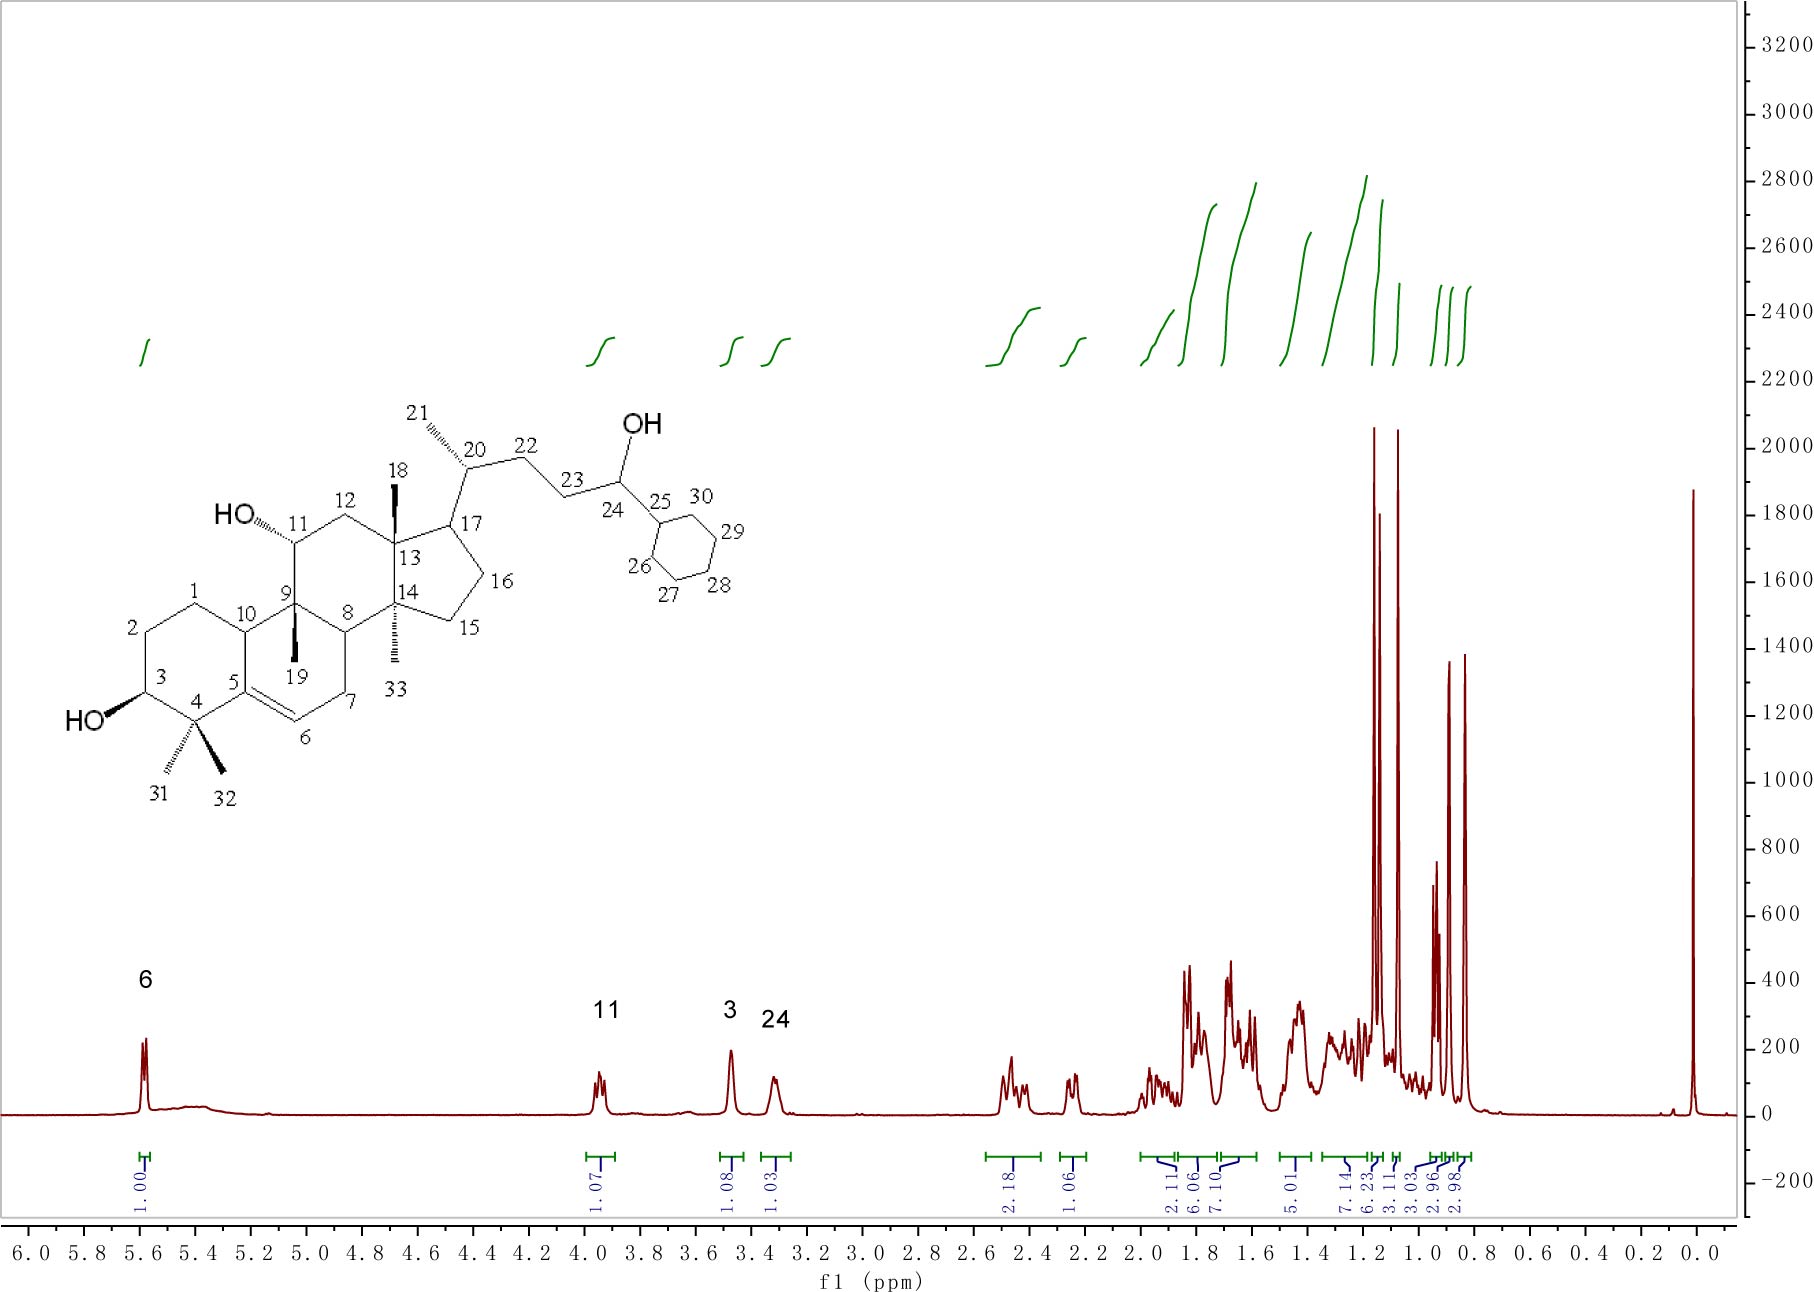


Fig. S30. 1H NMR of compound **9**.


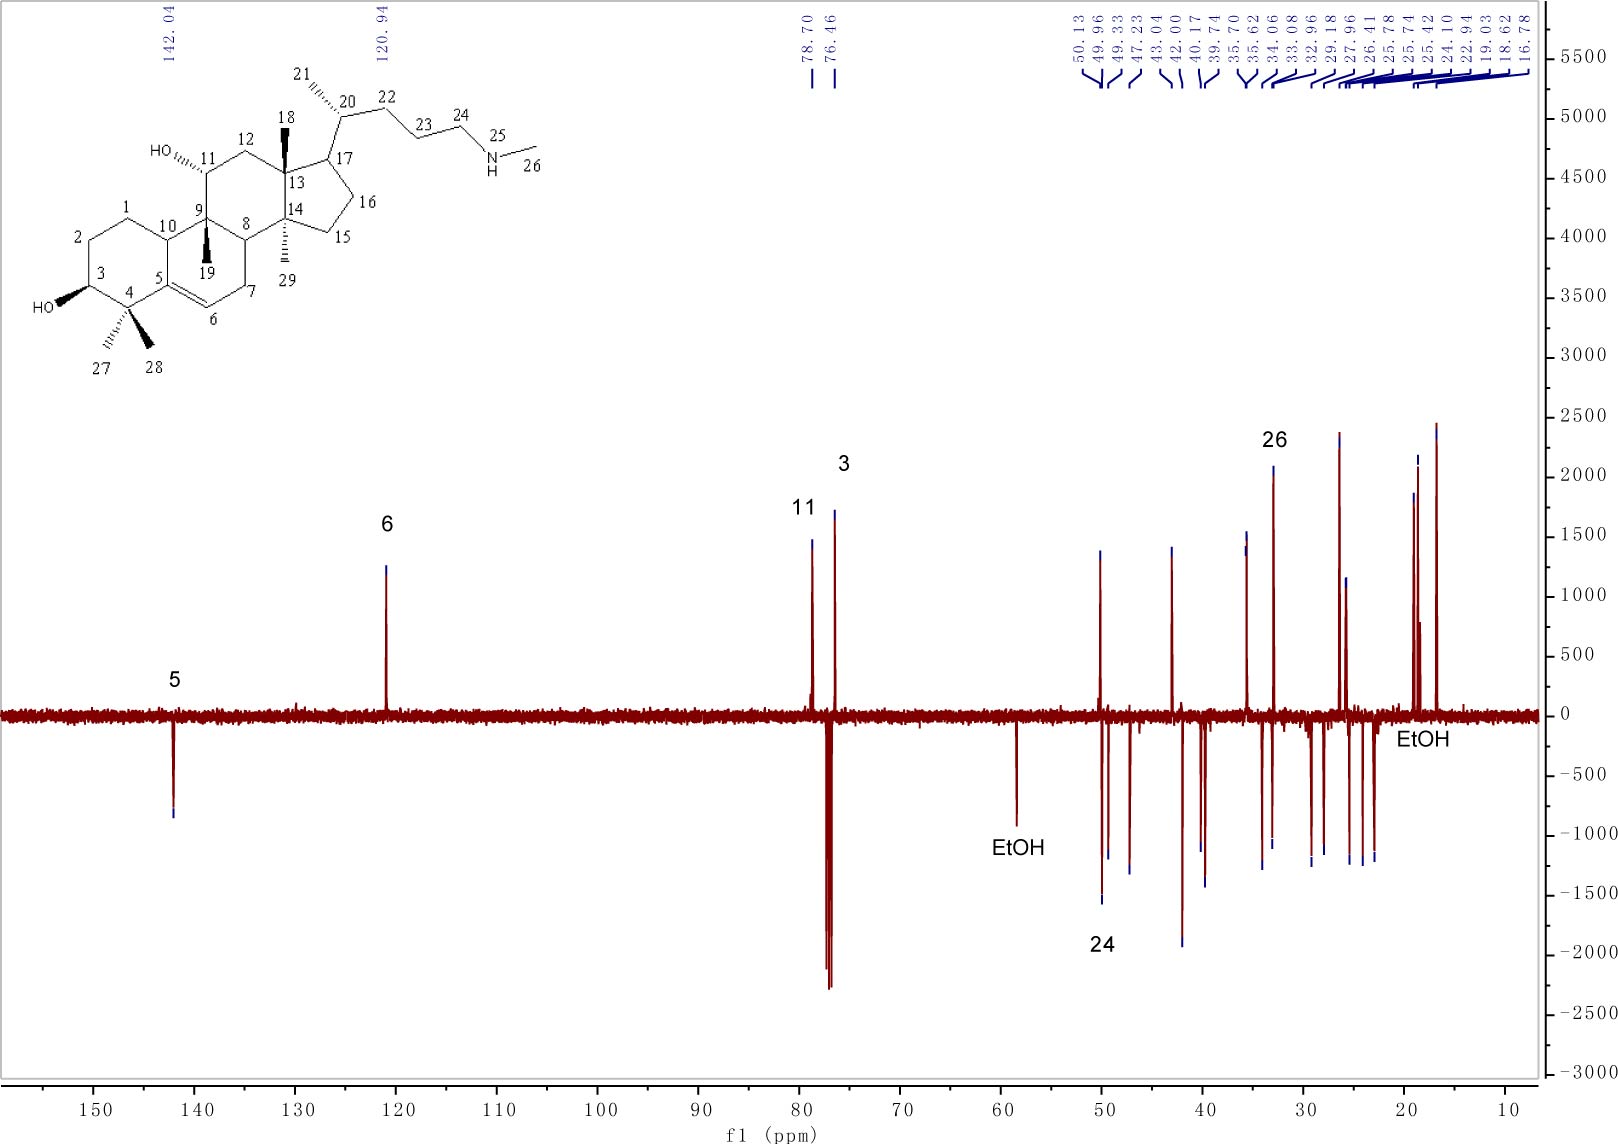


Fig. S17. 13C NMR (DEPTQ) of compound **10**.


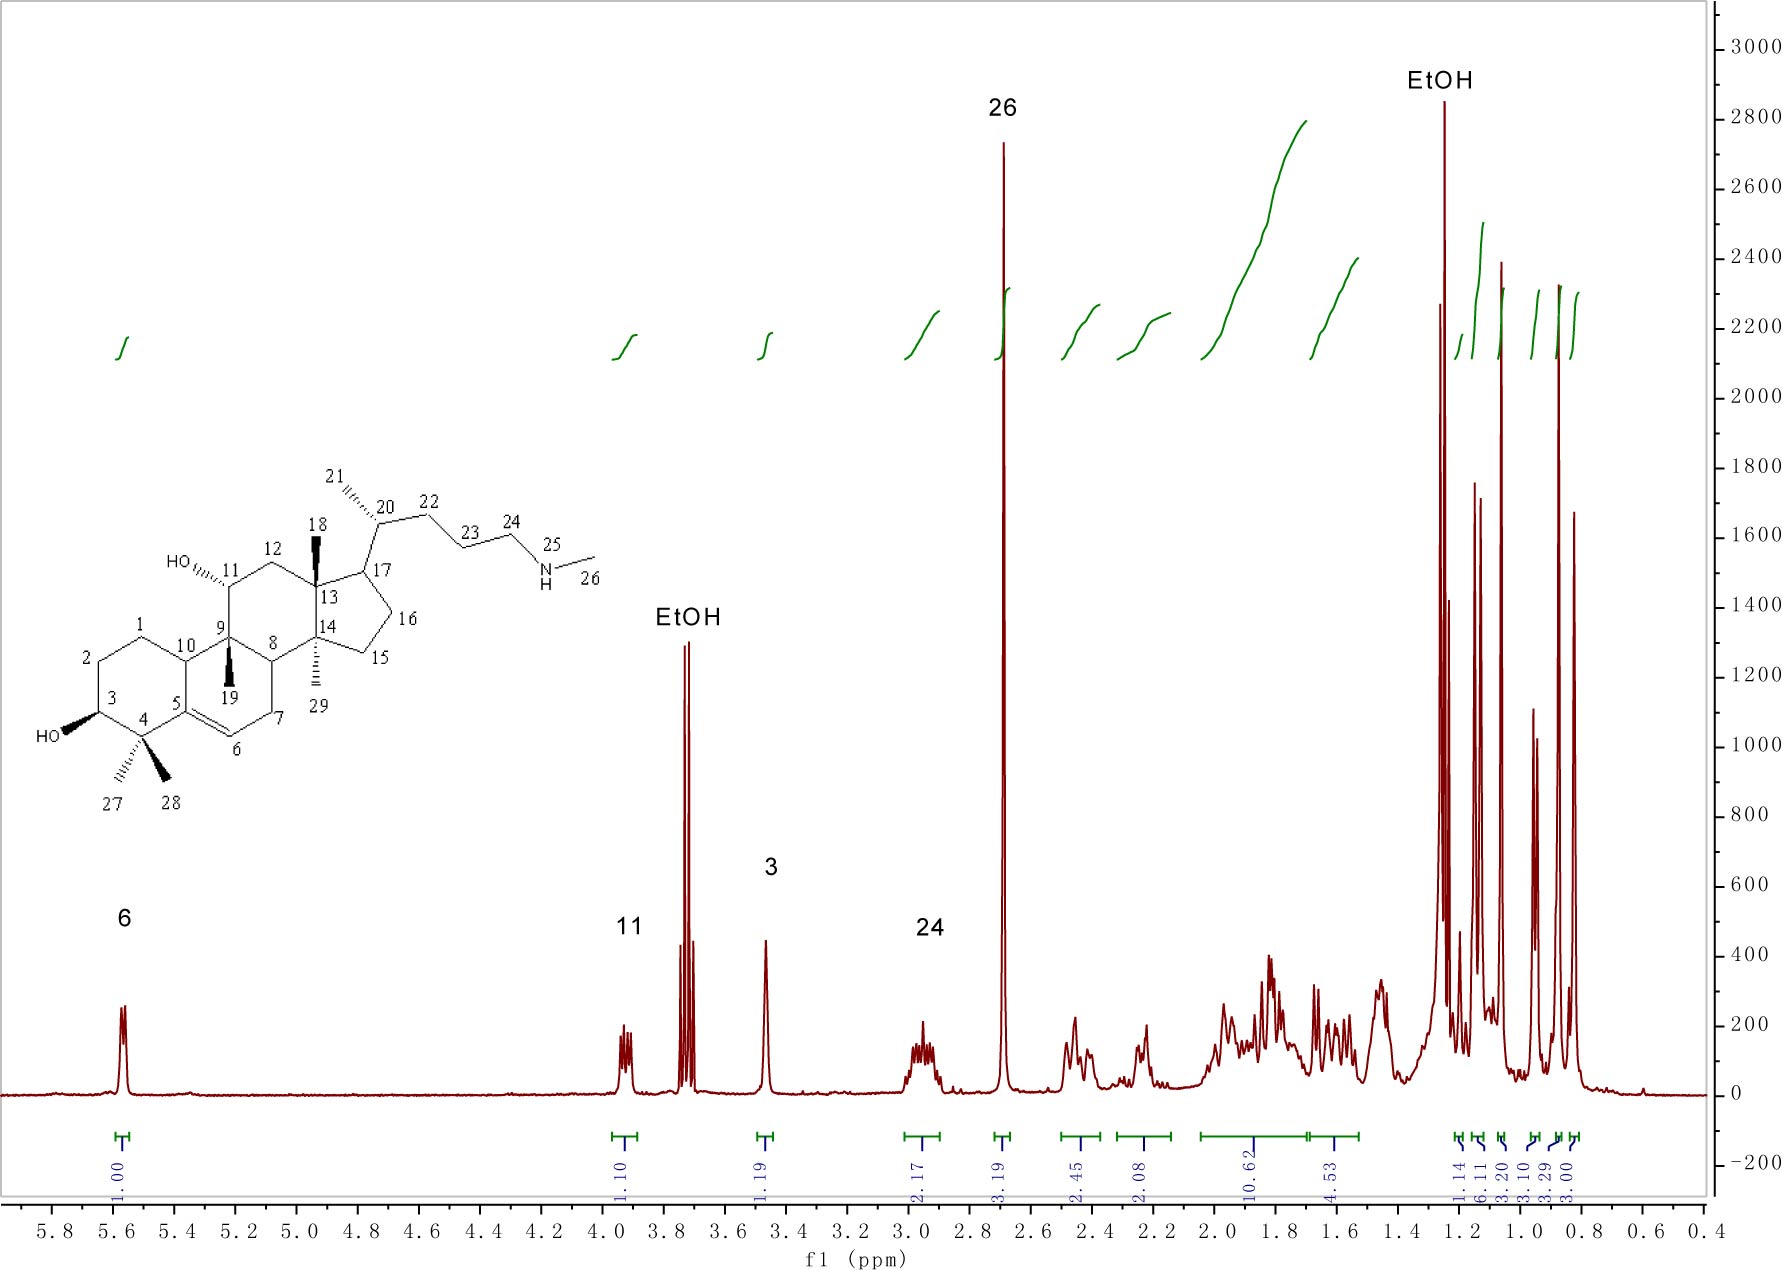


Fig. S18. 1H NMR of compound **10**.


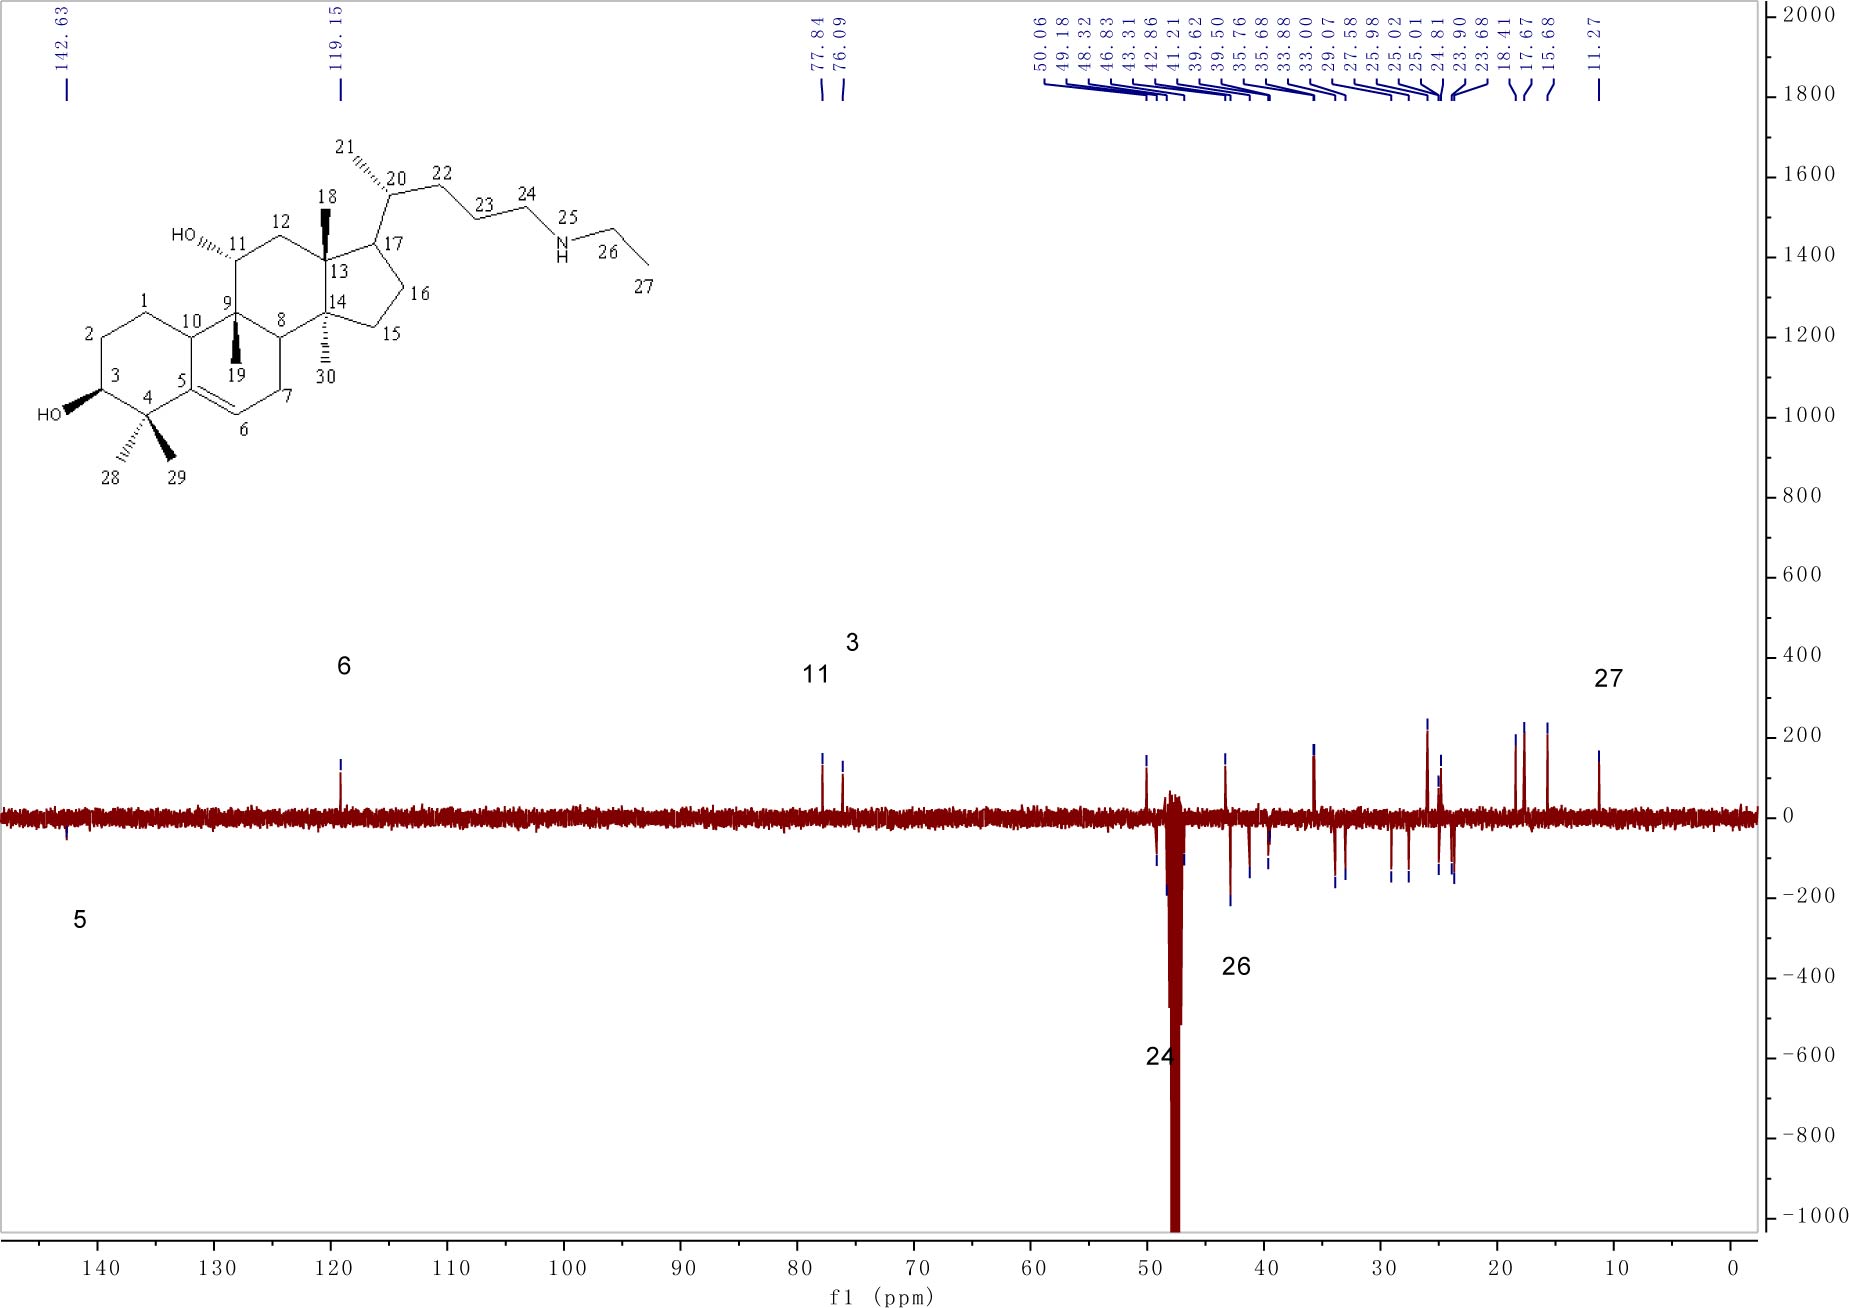


Fig. S19. 13C NMR (DEPTQ) of compound **11**.


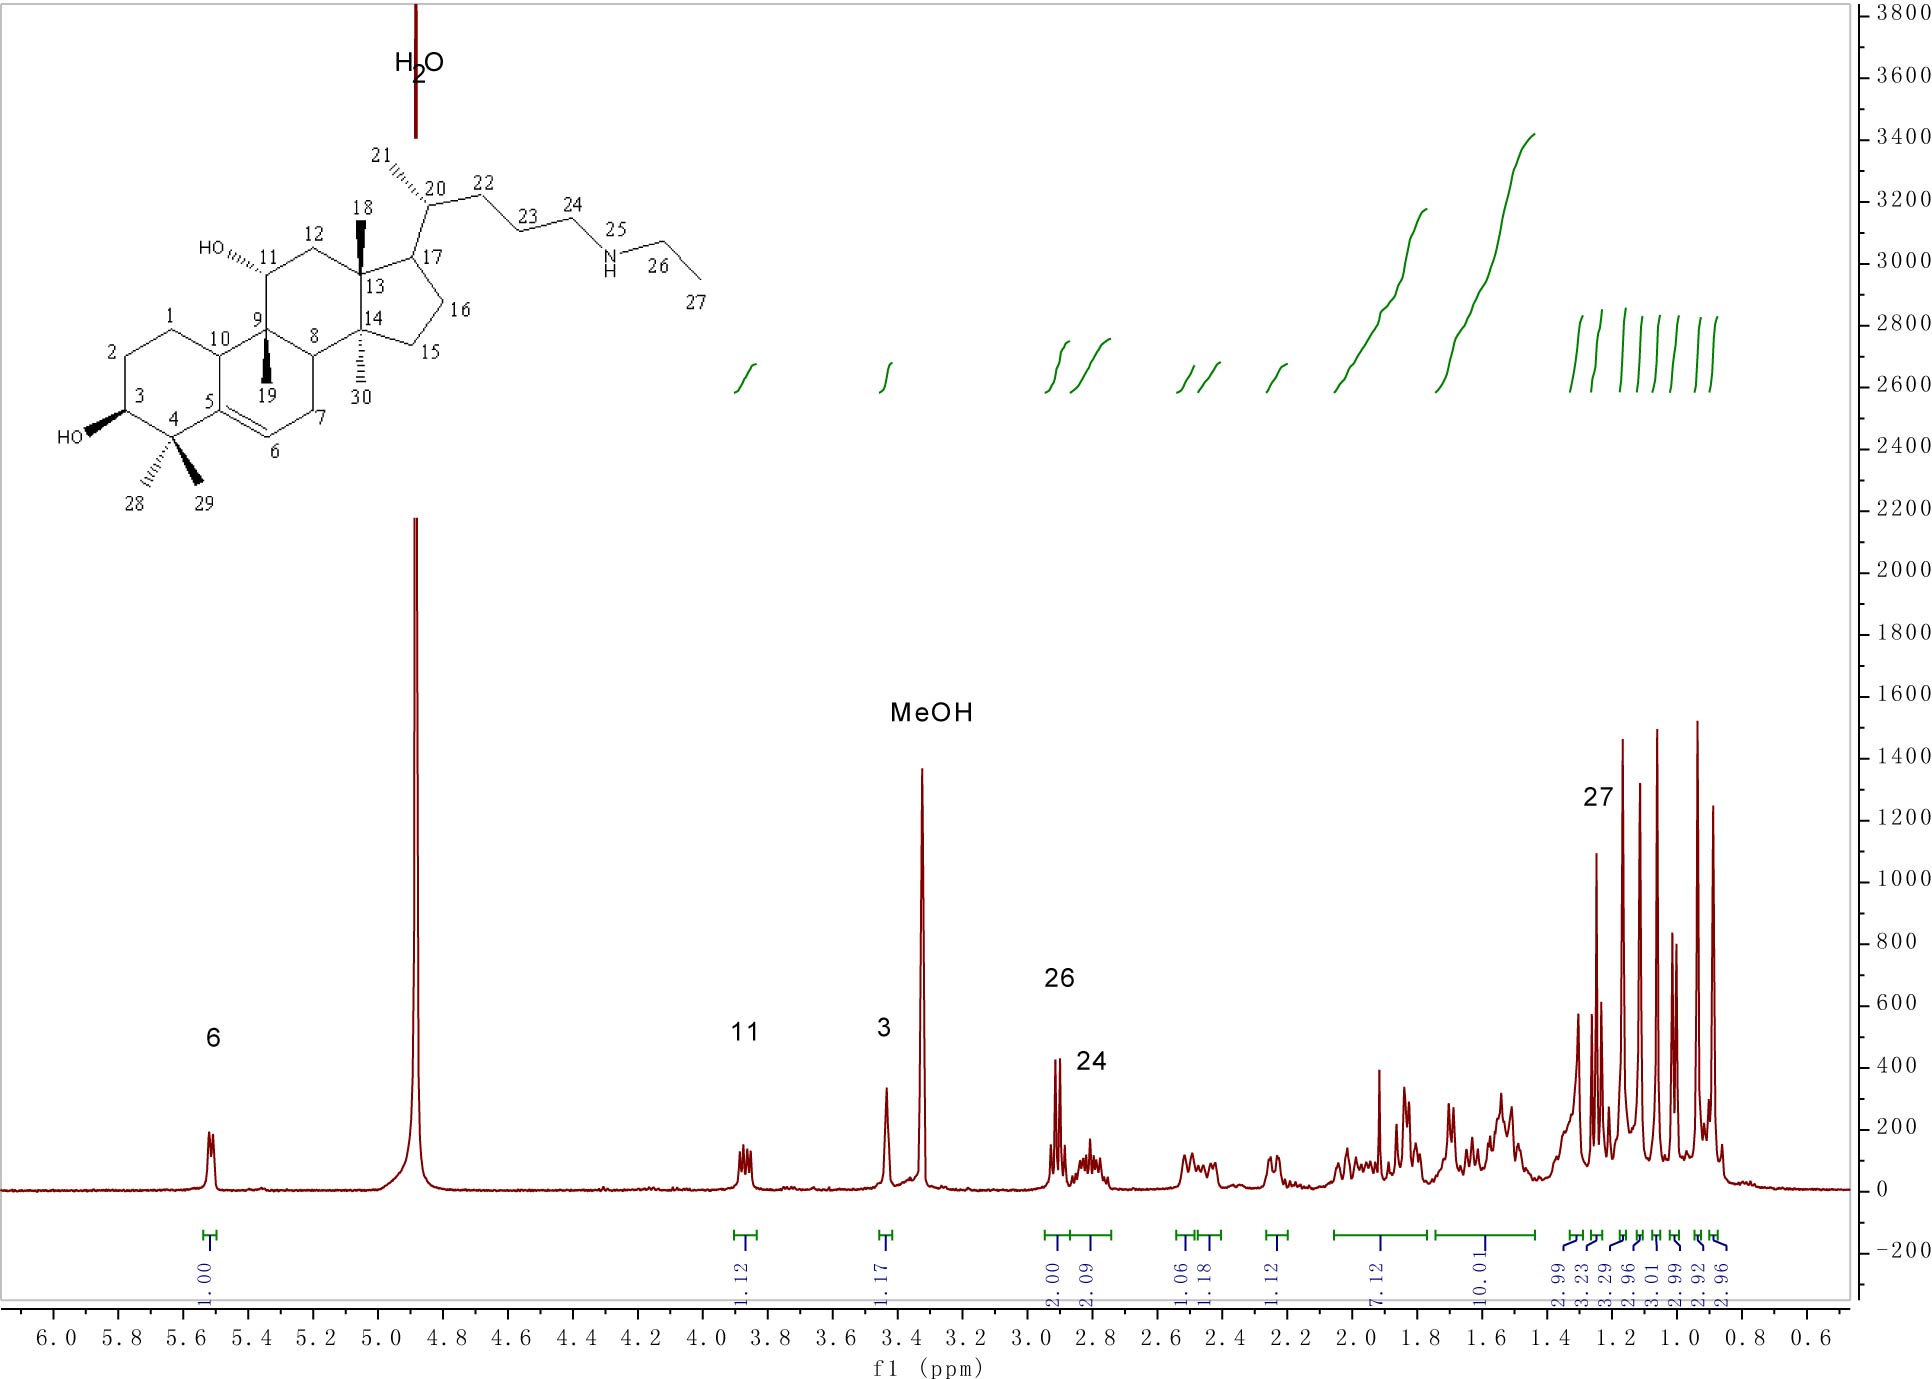


Fig. S20. 1H NMR of compound **11**.


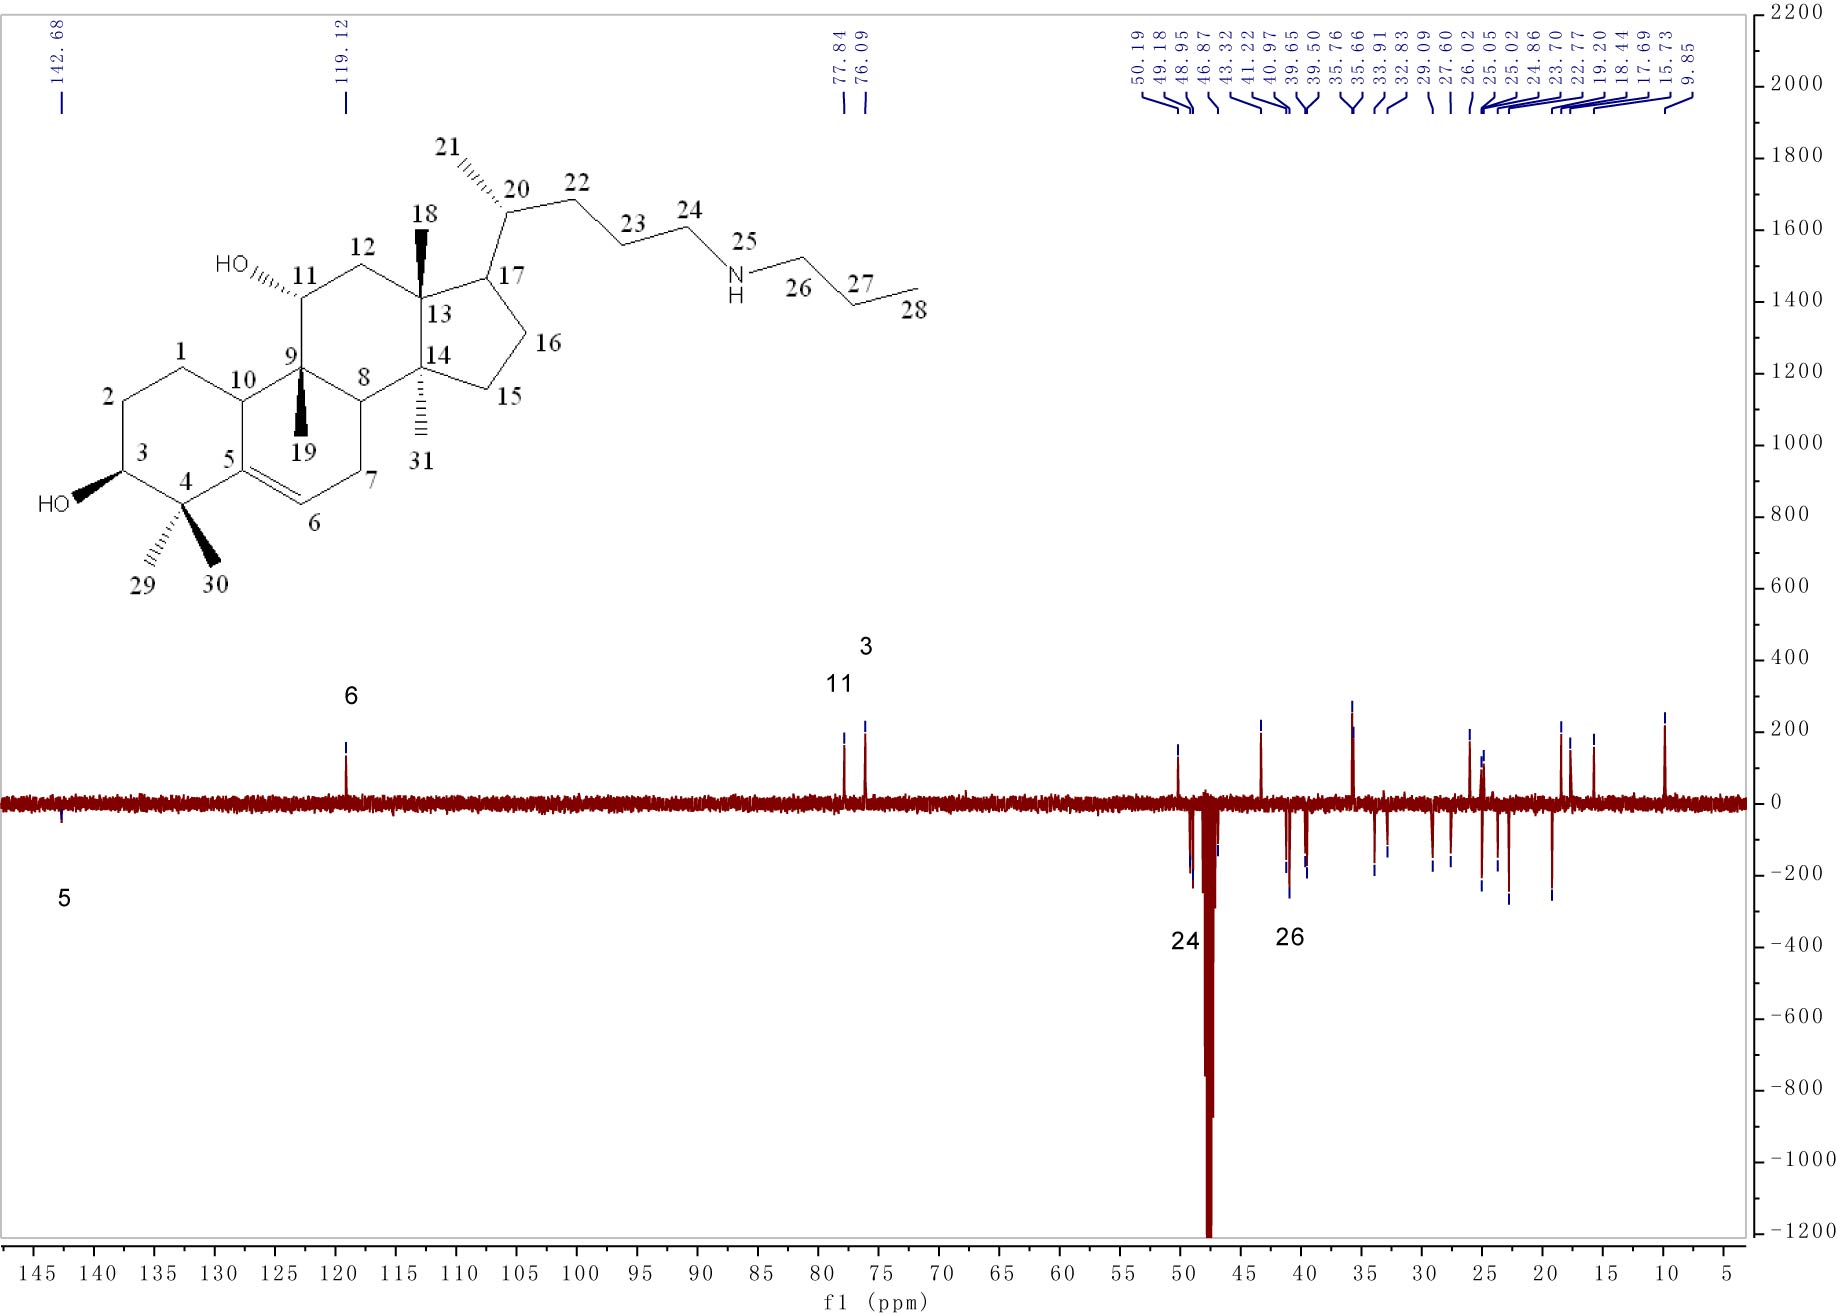


Fig. S21. 13C NMR (DEPTQ) of compound **12**.


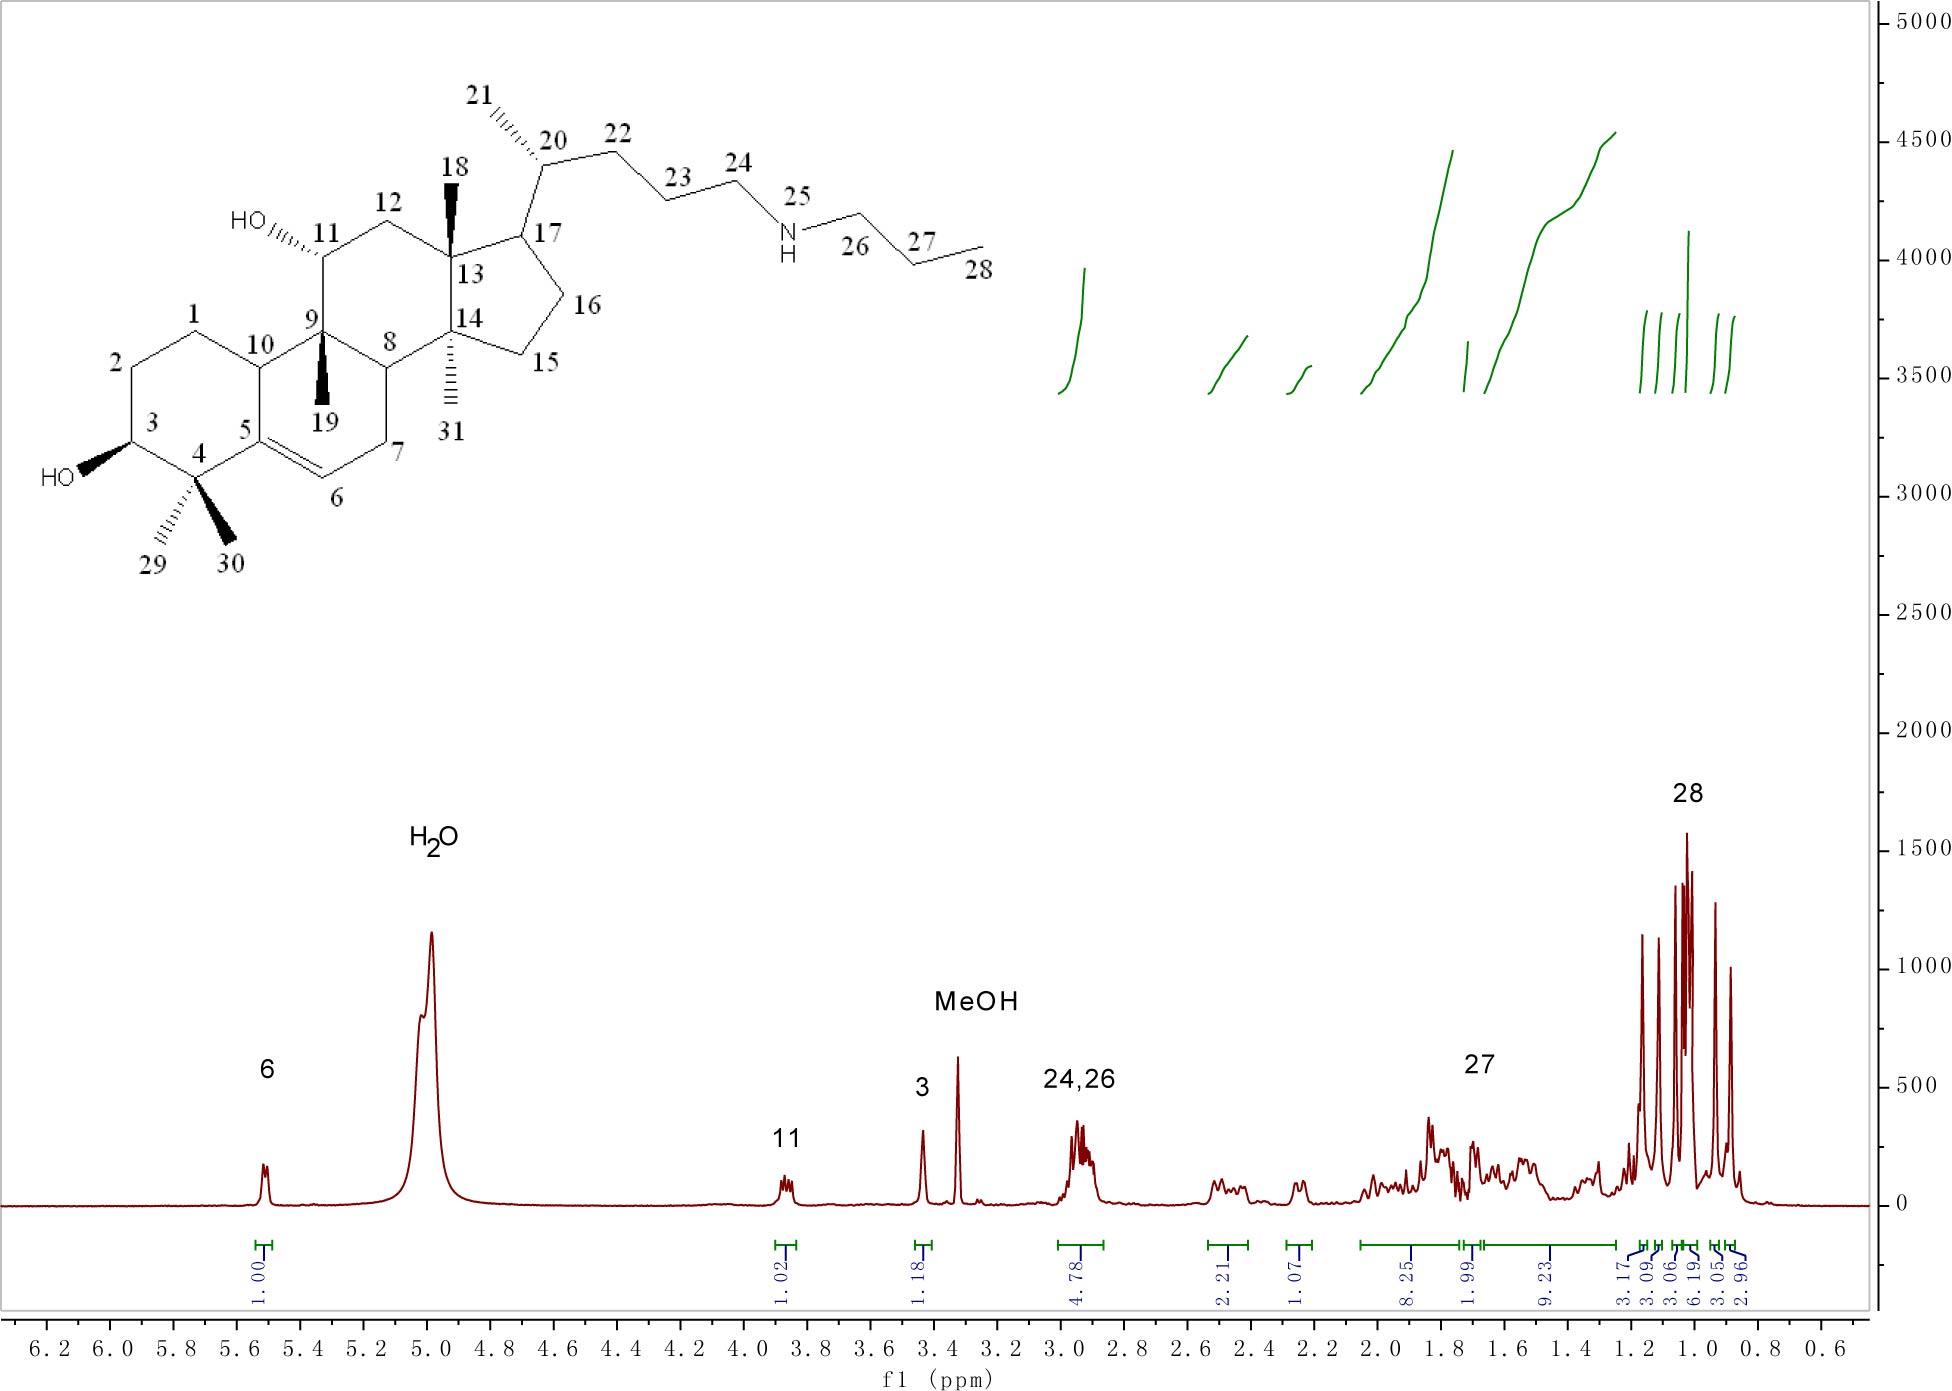


Fig. S22. 1H NMR of compound **12**.


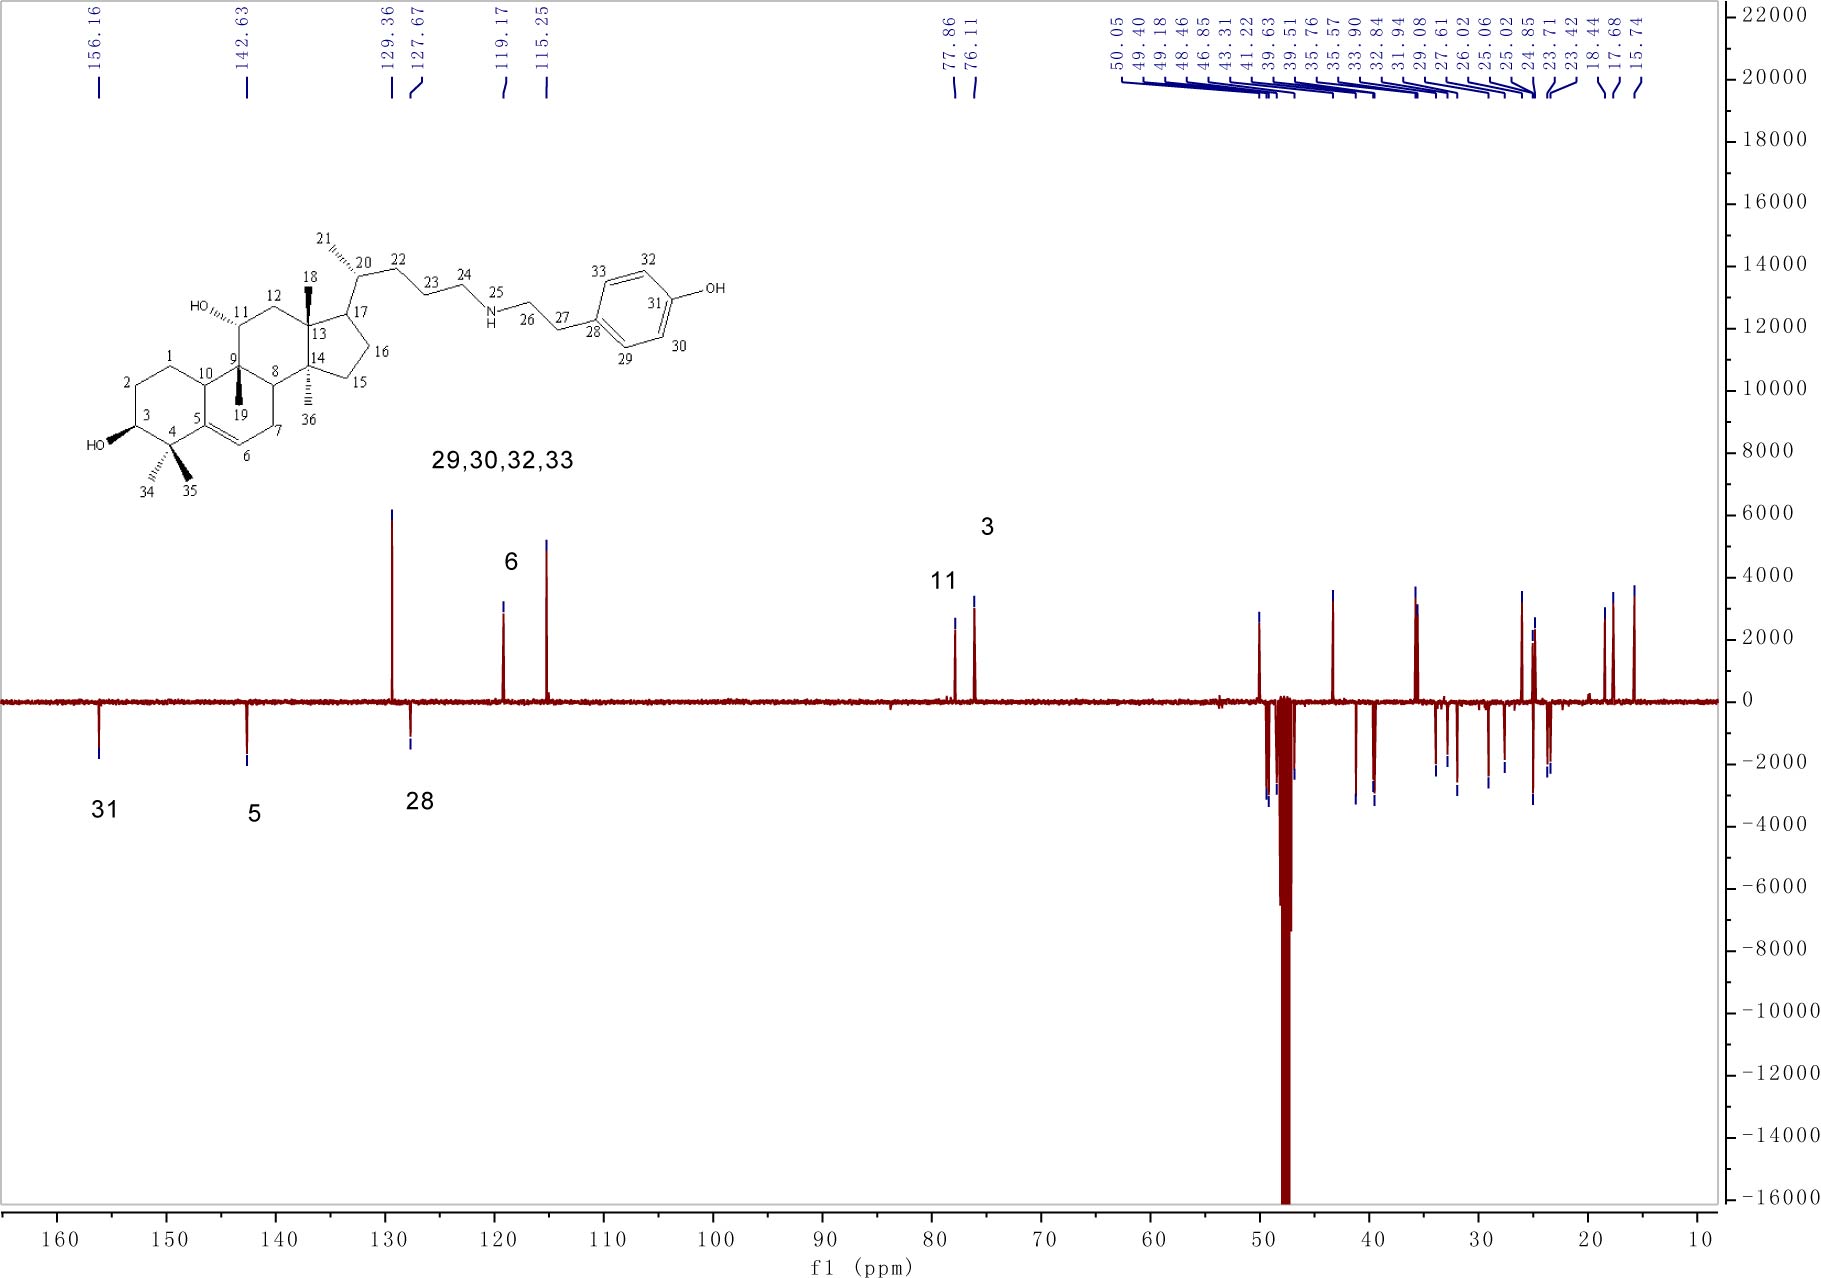


Fig. S23. 13C NMR (DEPTQ) of compound **13**.


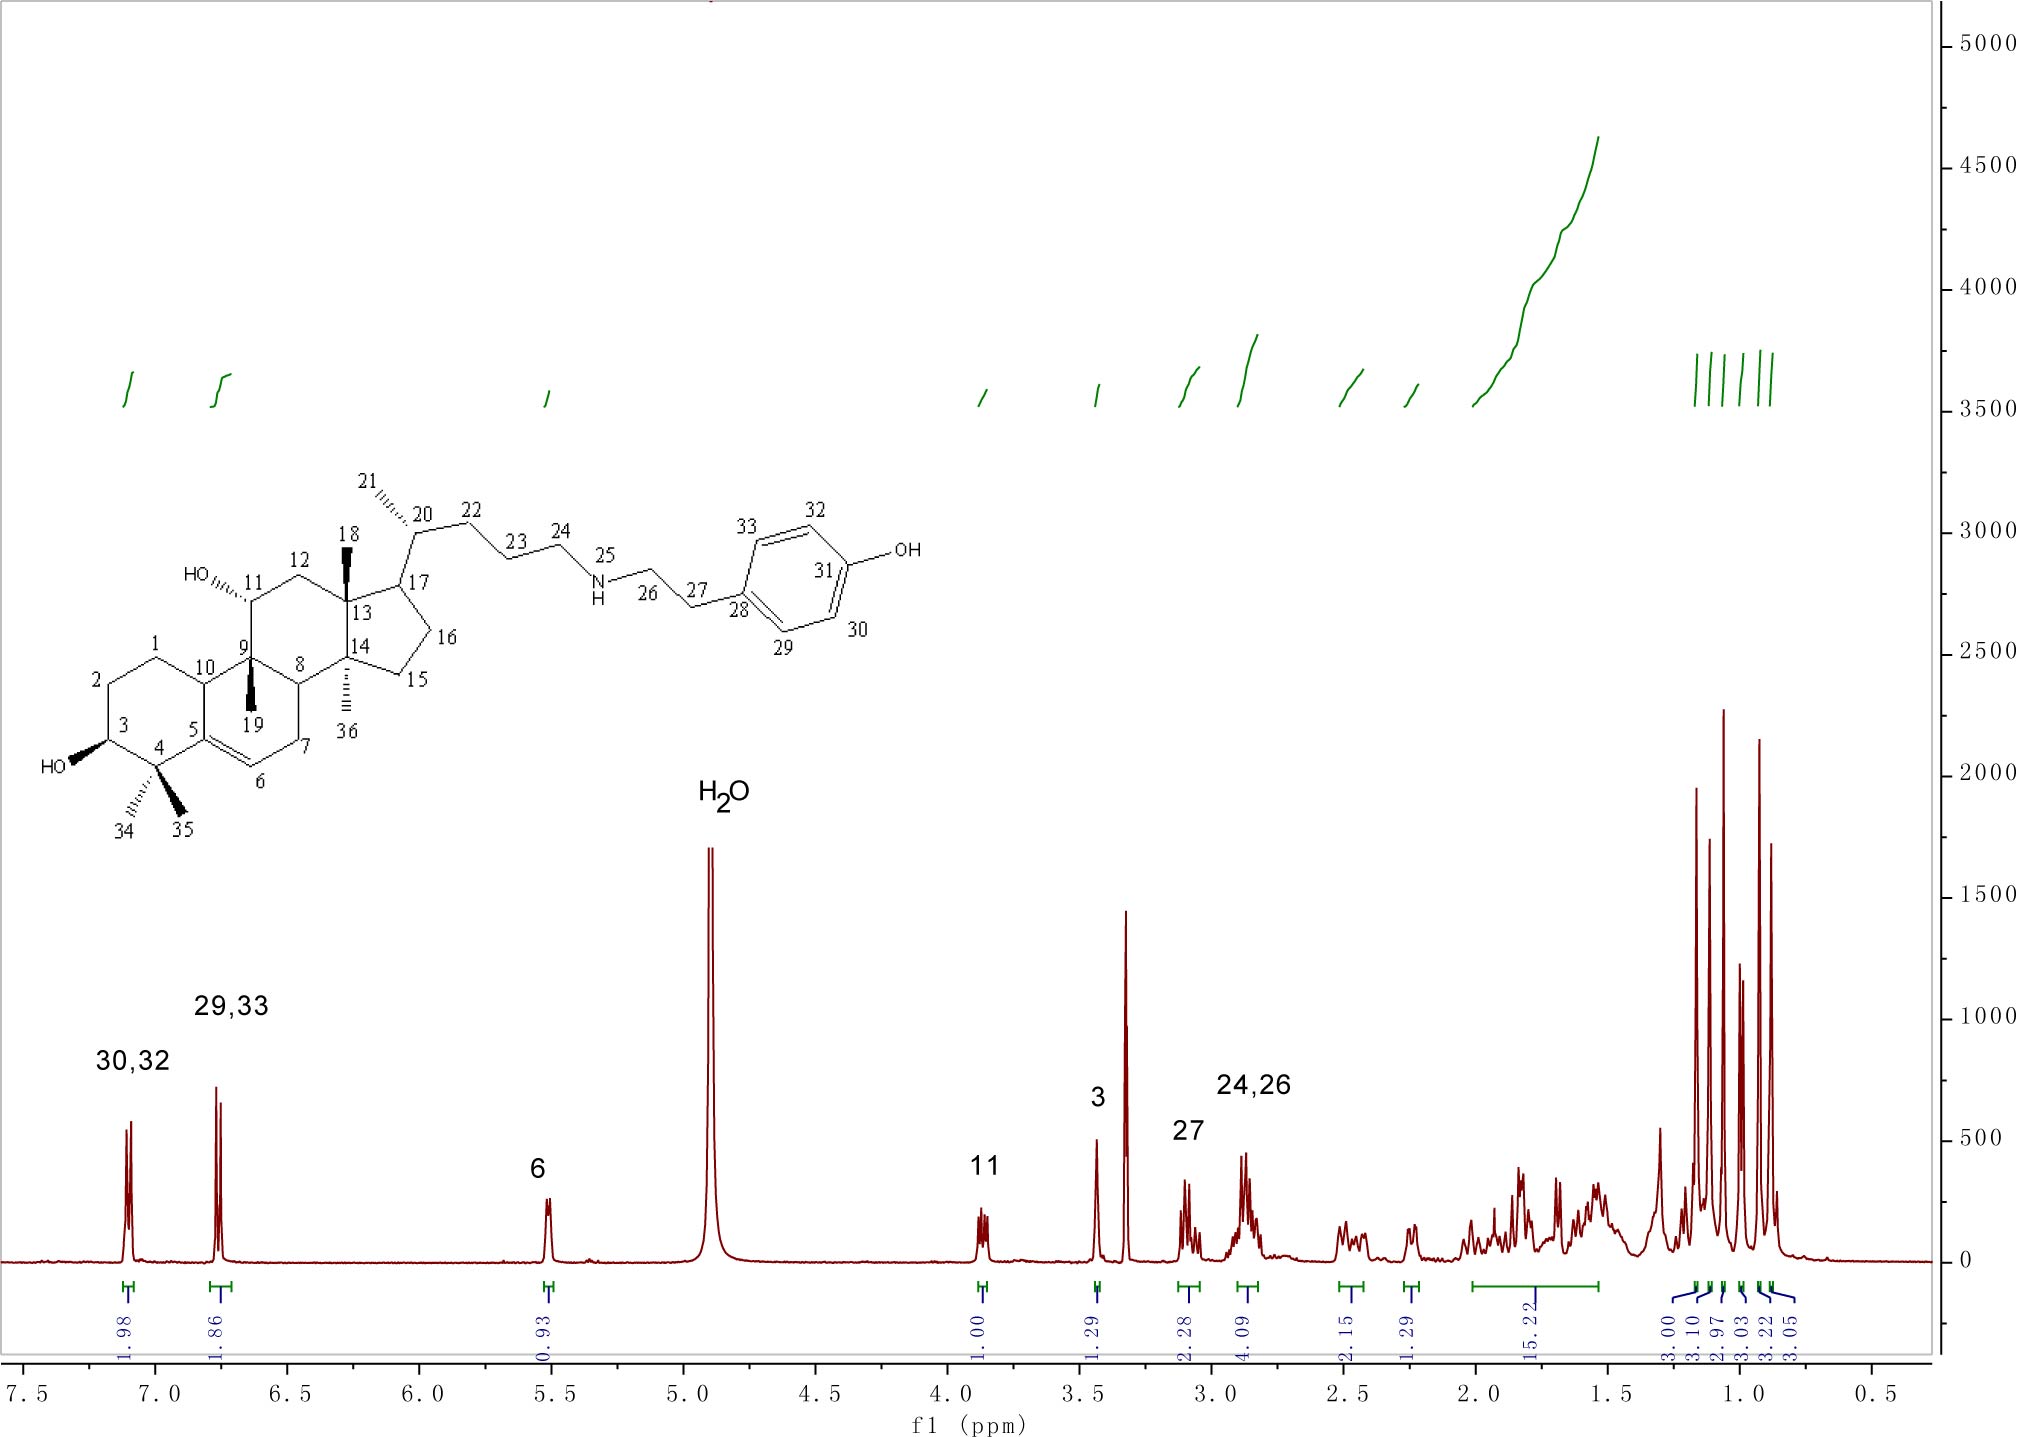


Fig. S24. 1H NMR of compound **13**.


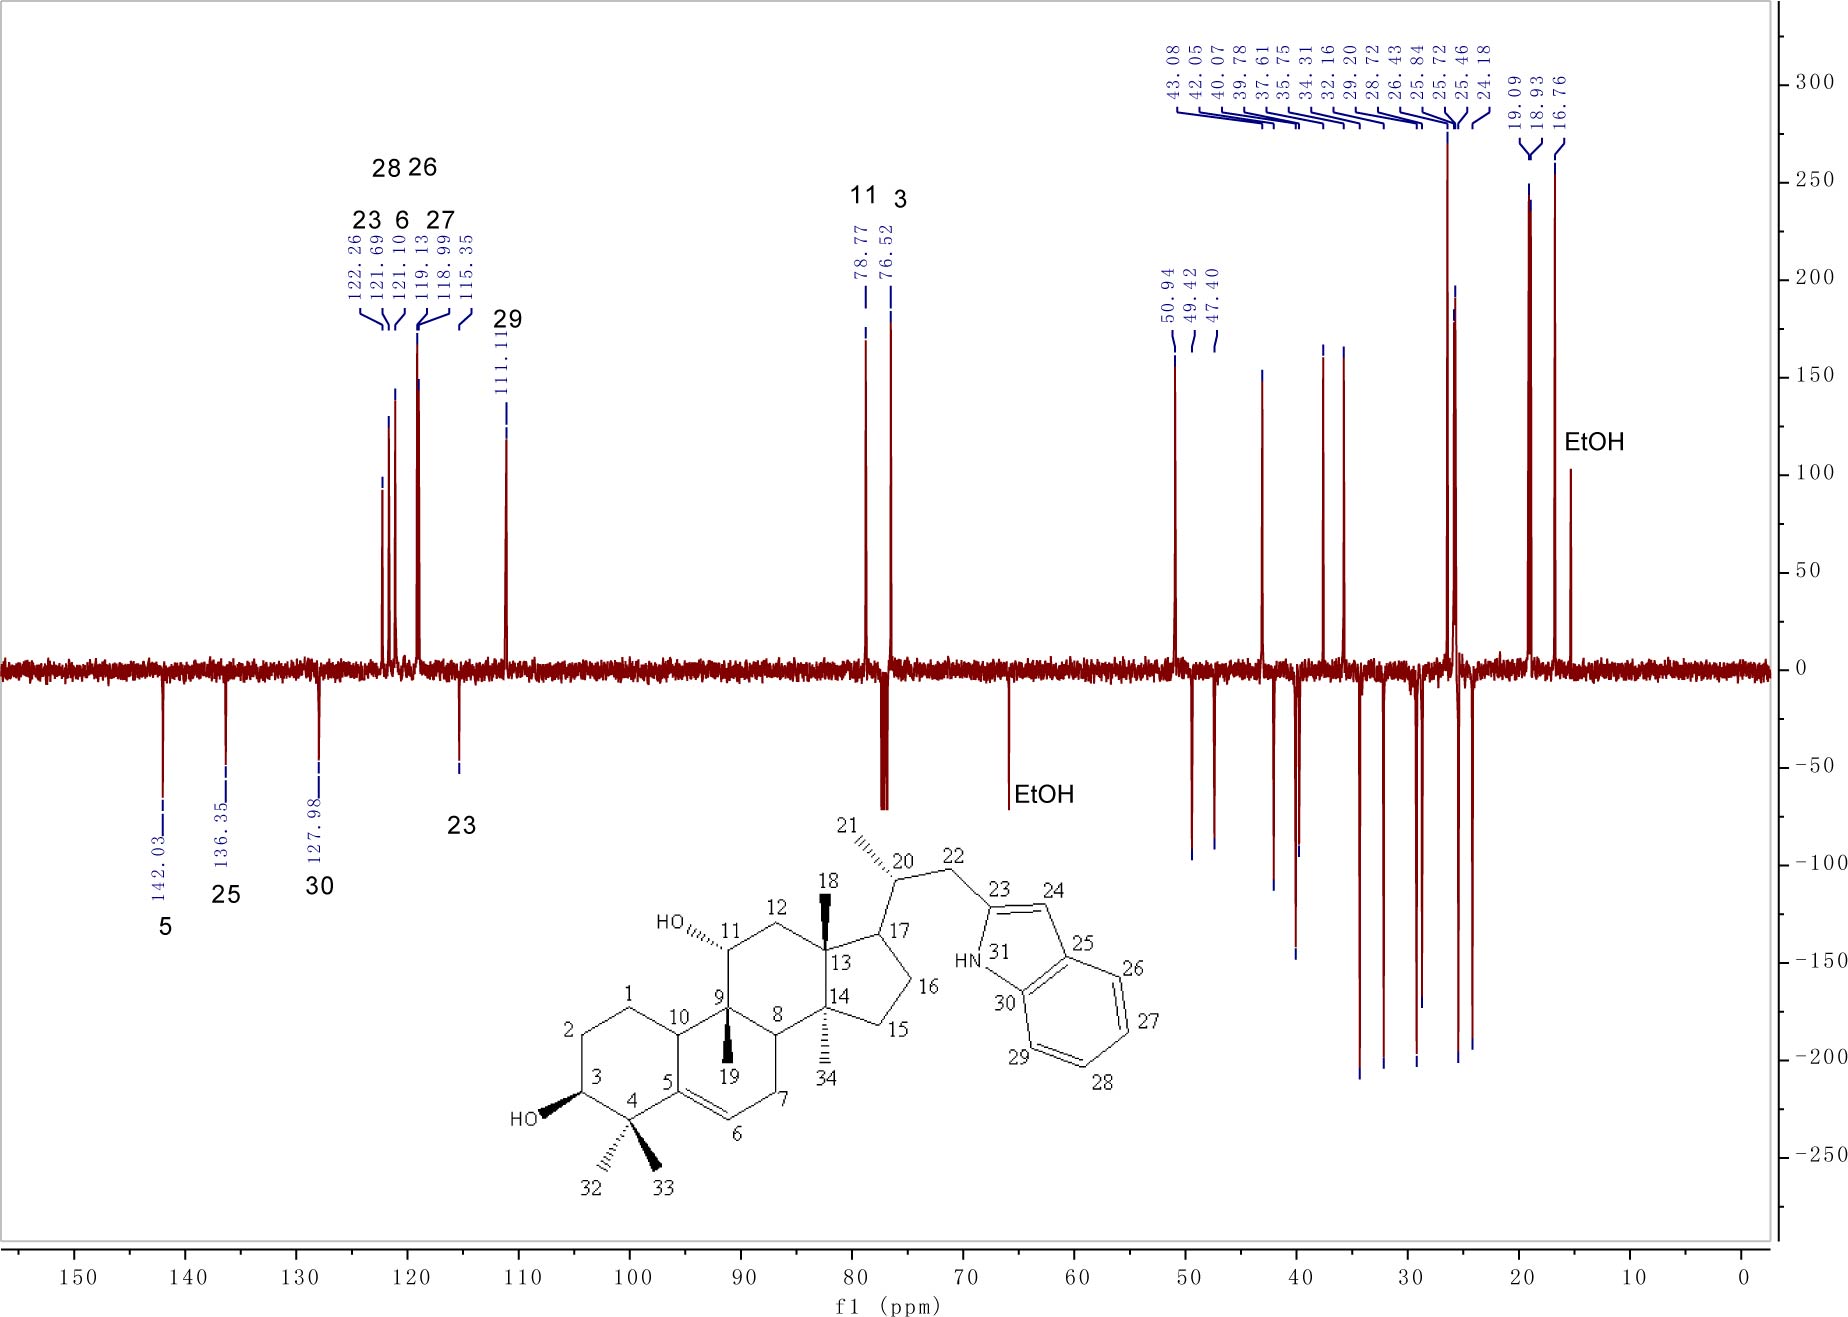


Fig. S31. 13C NMR (DEPTQ) of compound **14**.


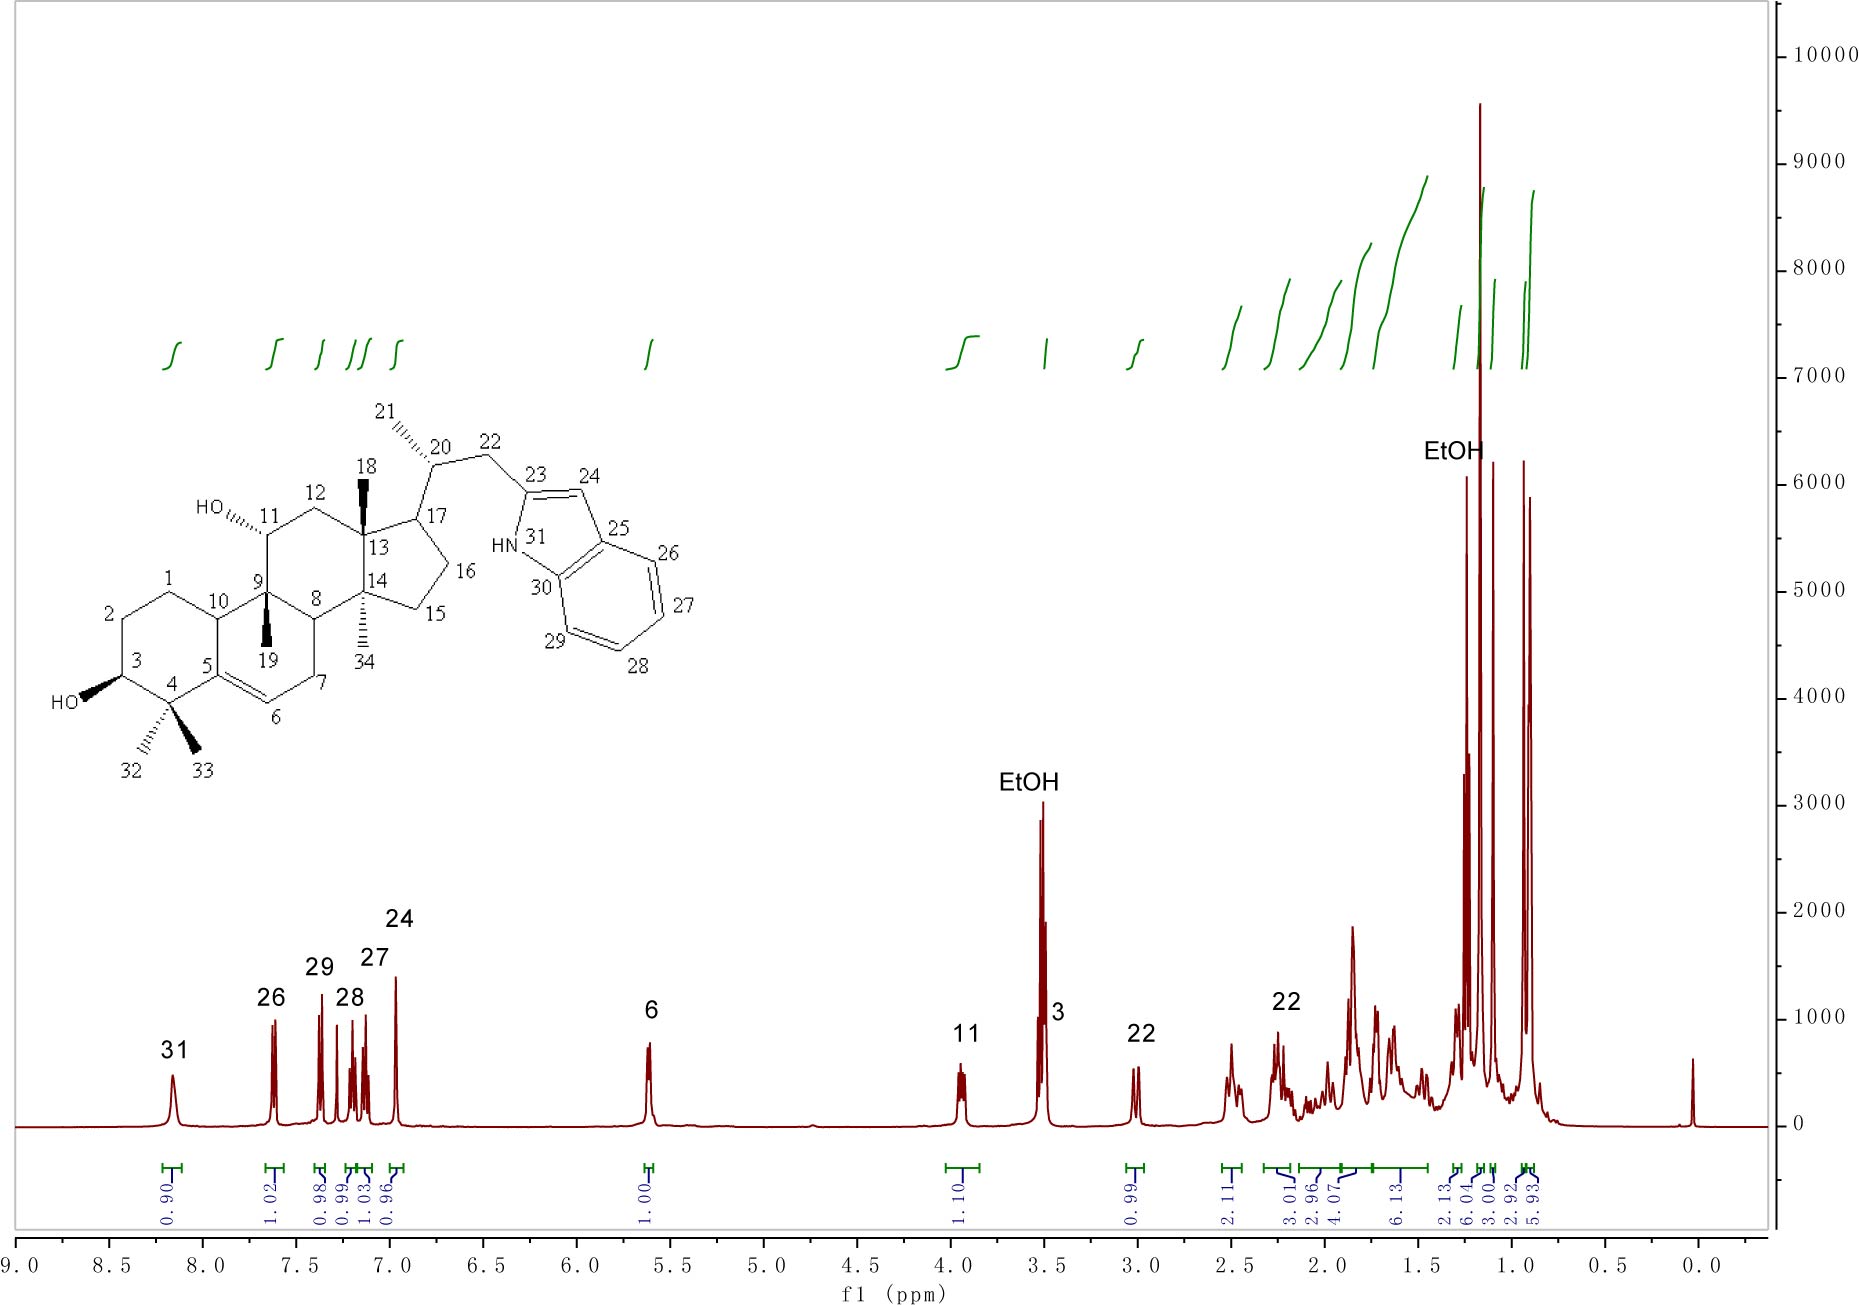


Fig. S32. 1H NMR of compound **14**.


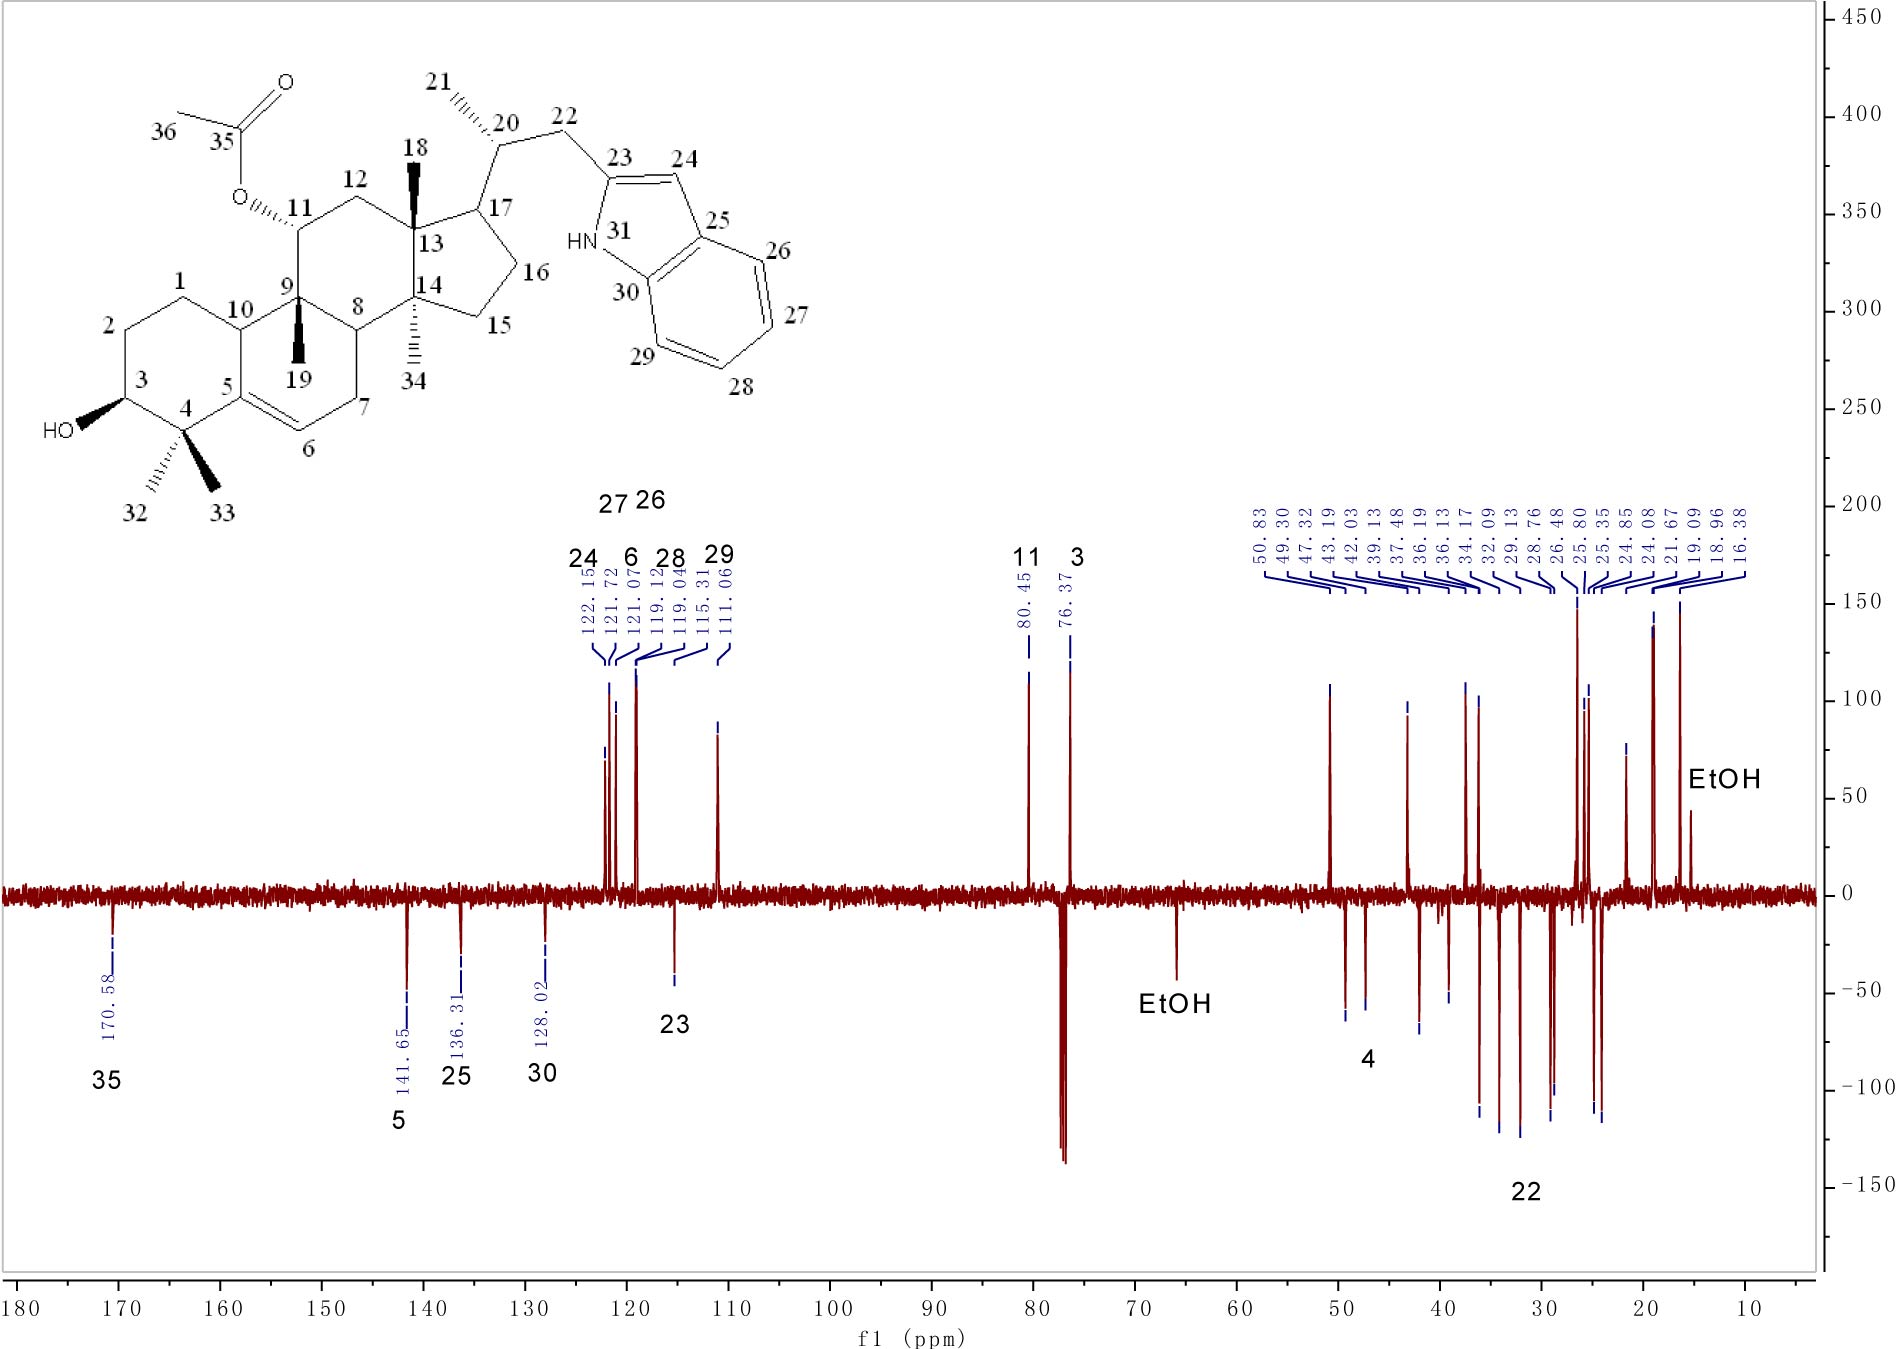


Fig. S33. 13C NMR (DEPTQ) of compound **15**.


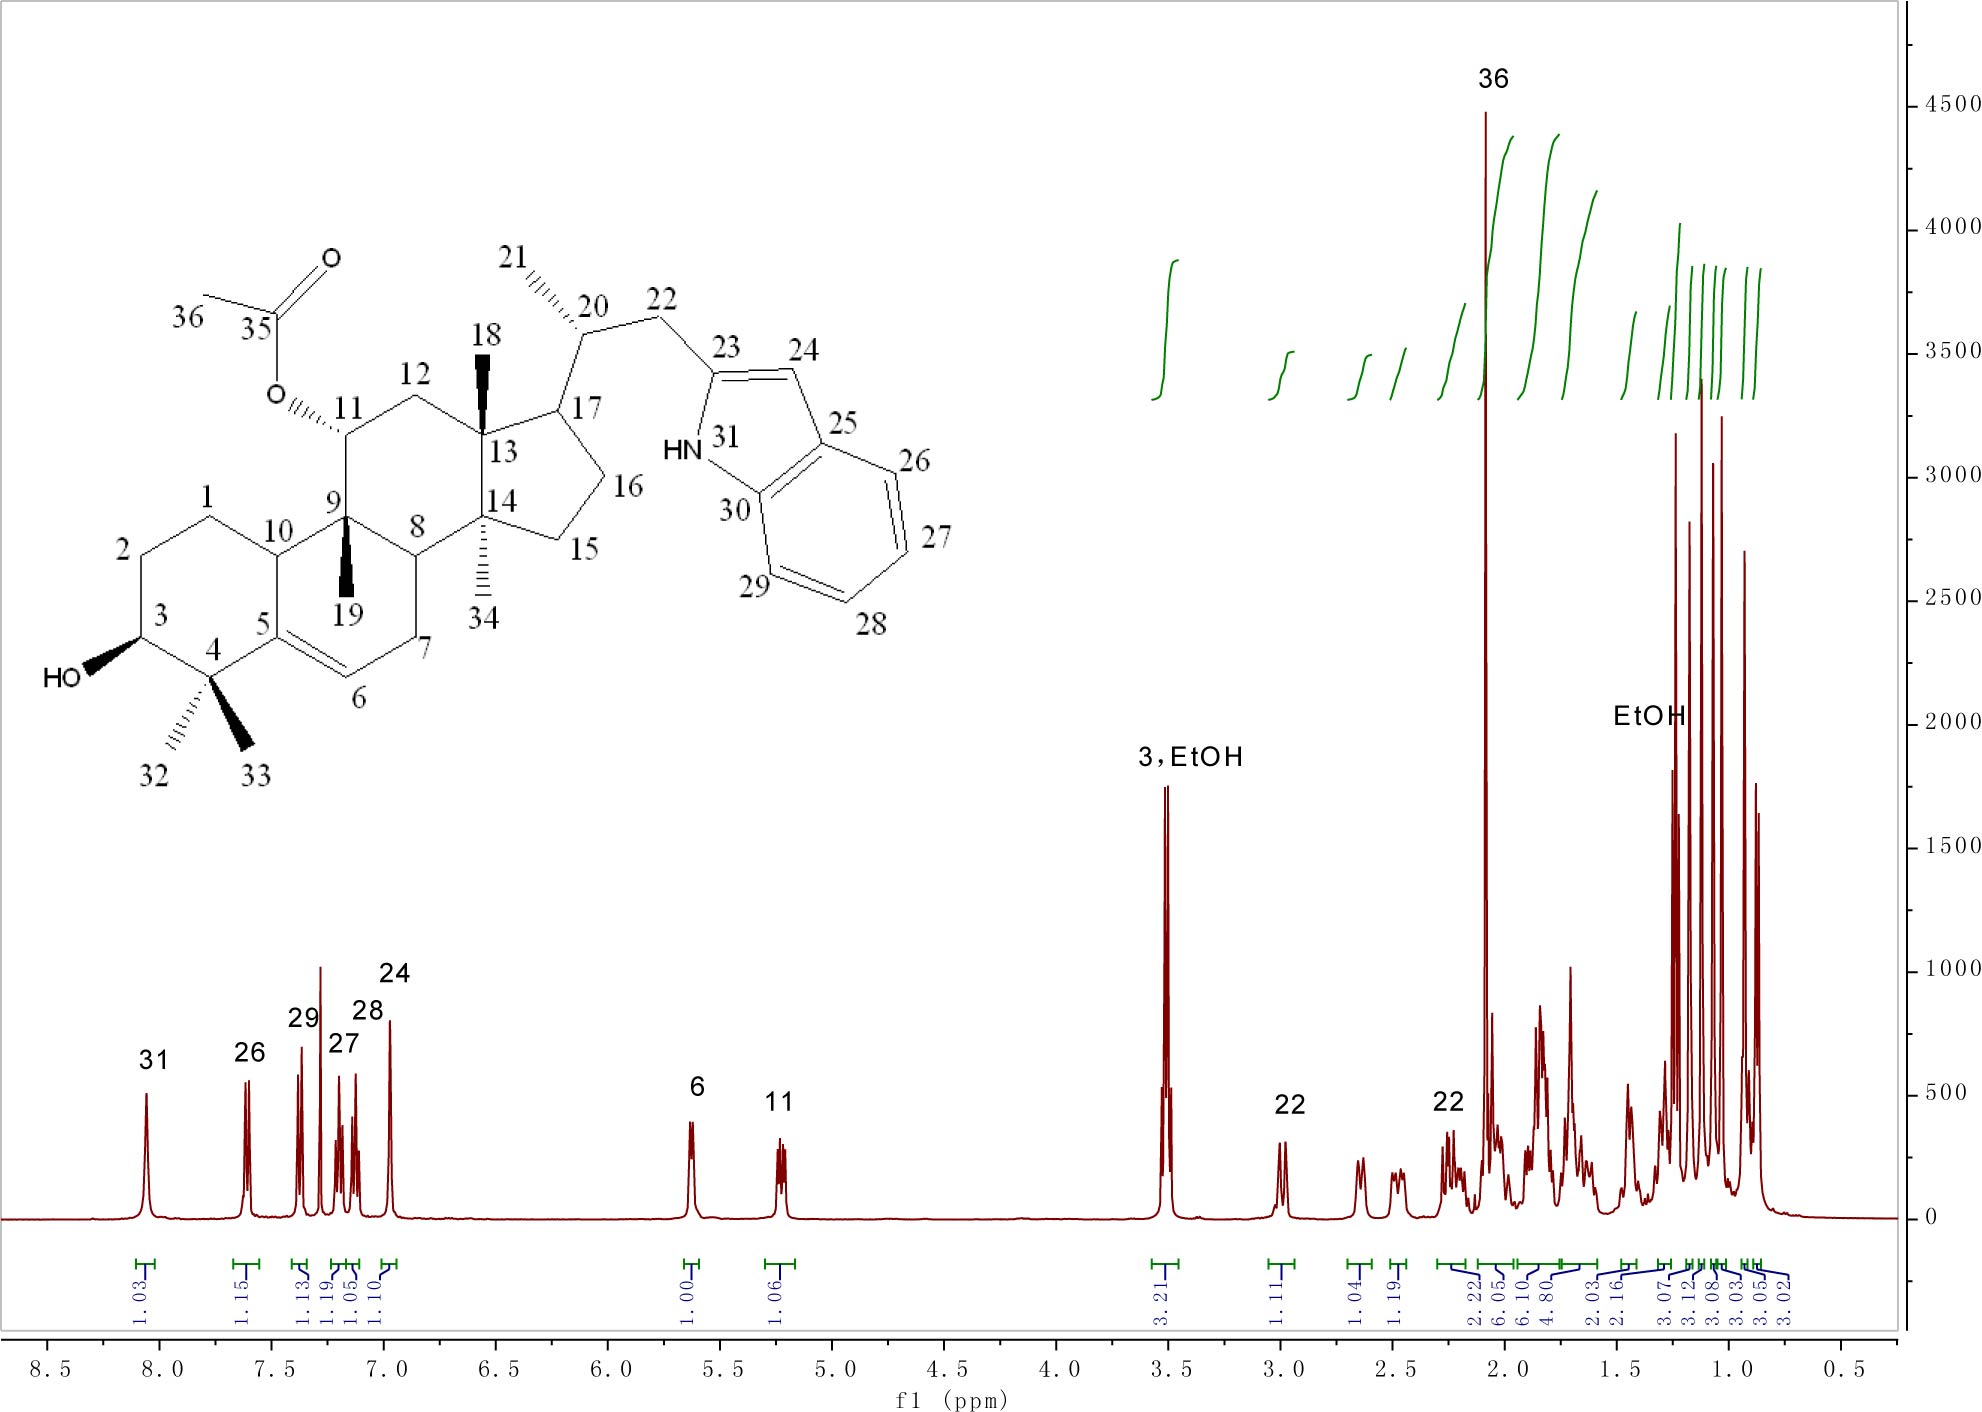


Fig. S34. 1H NMR of compound **15**.


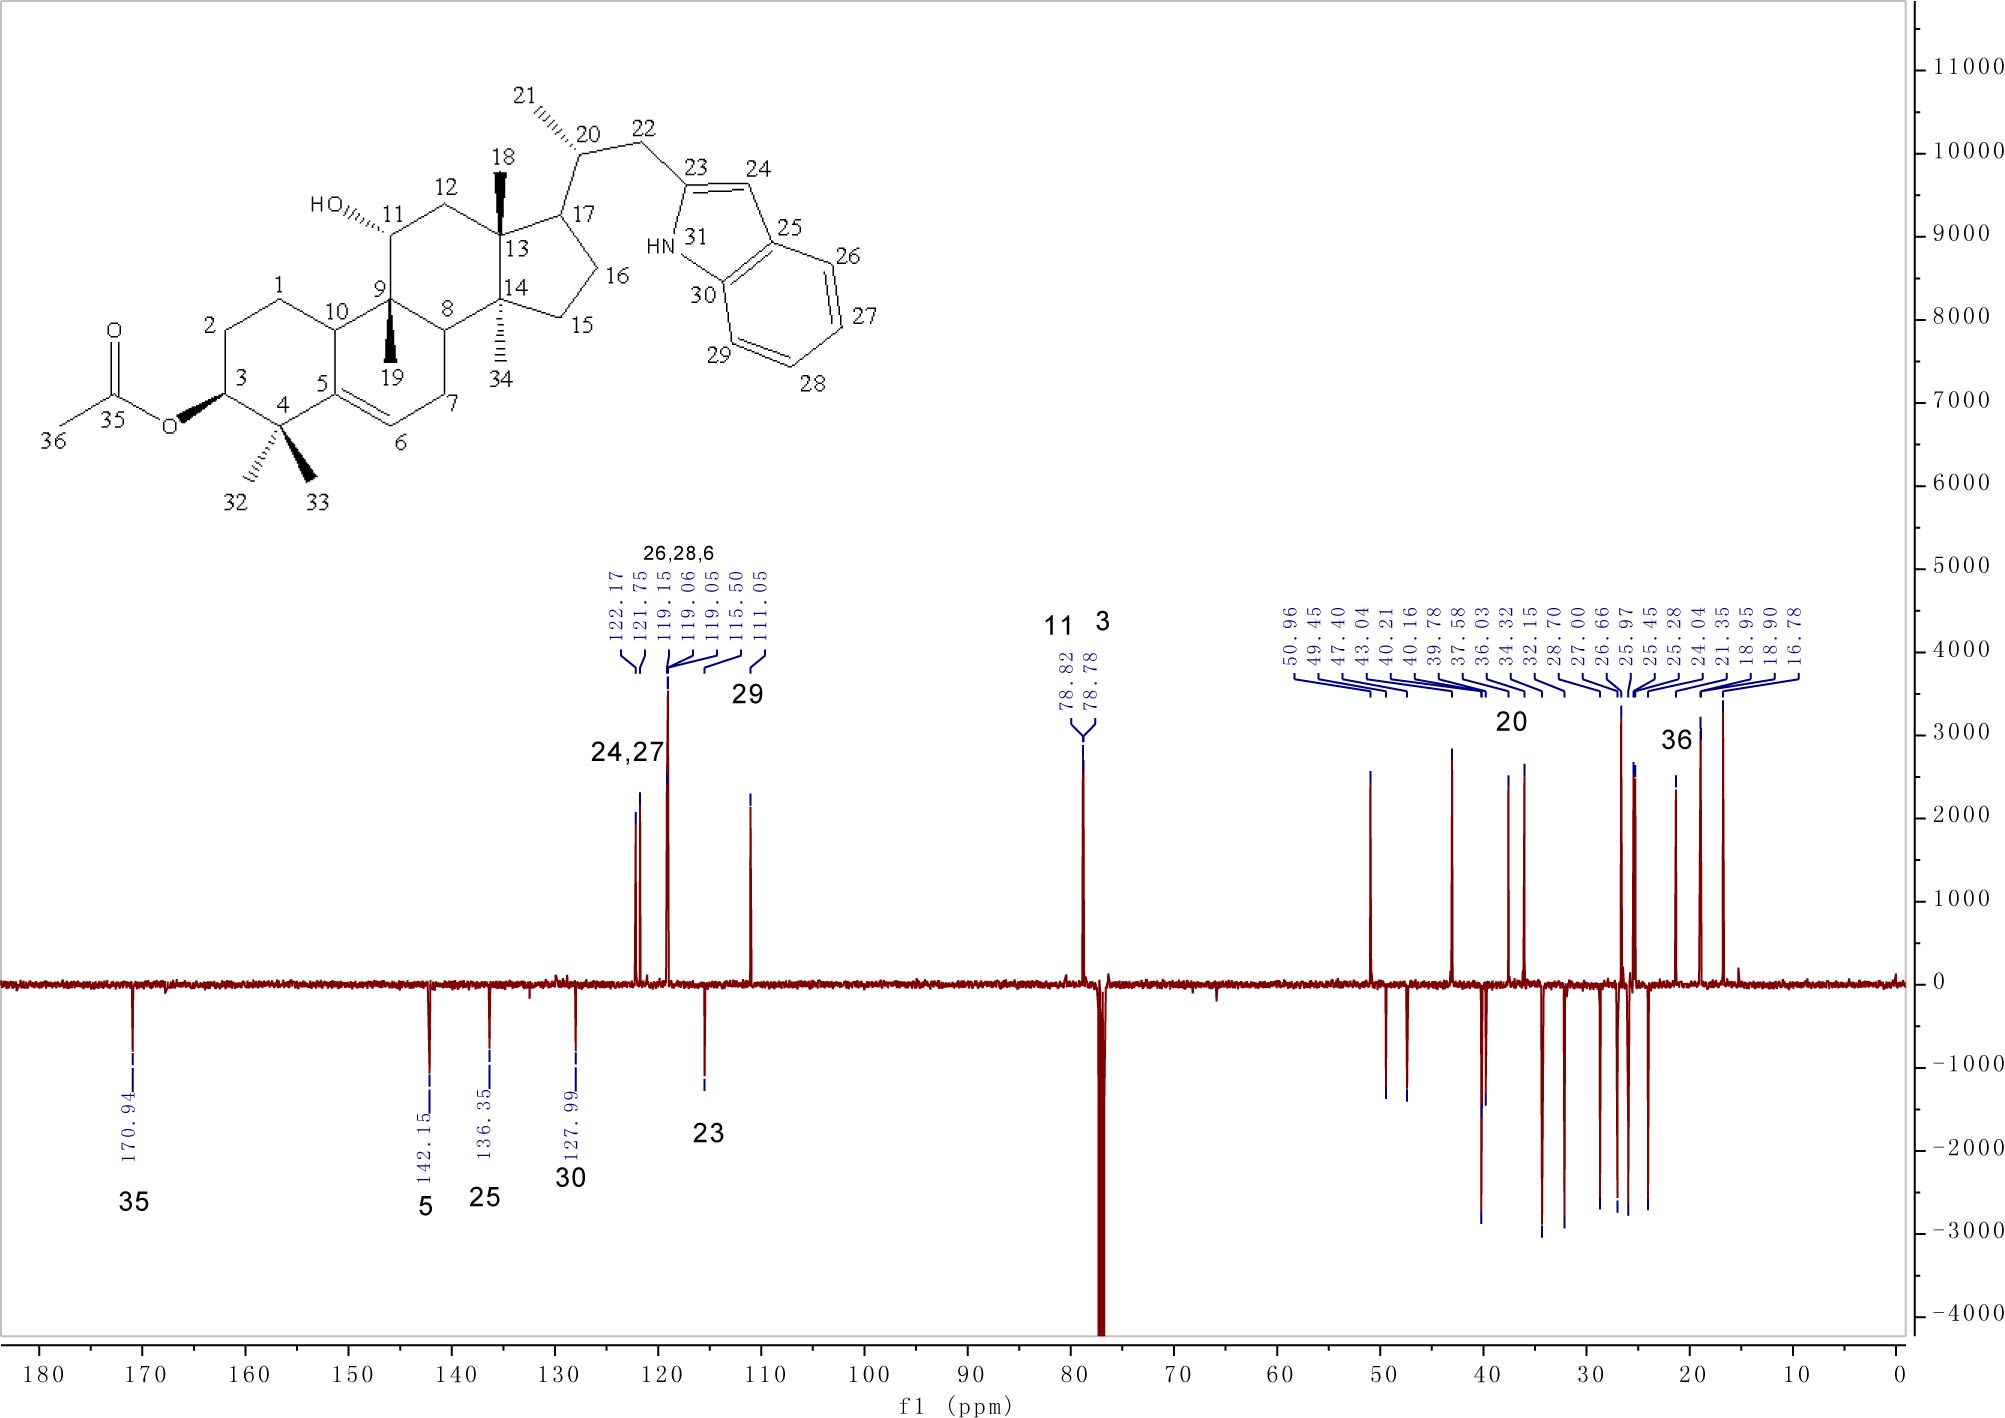


Fig. S35. 13C NMR (DEPTQ) of compound **16**.


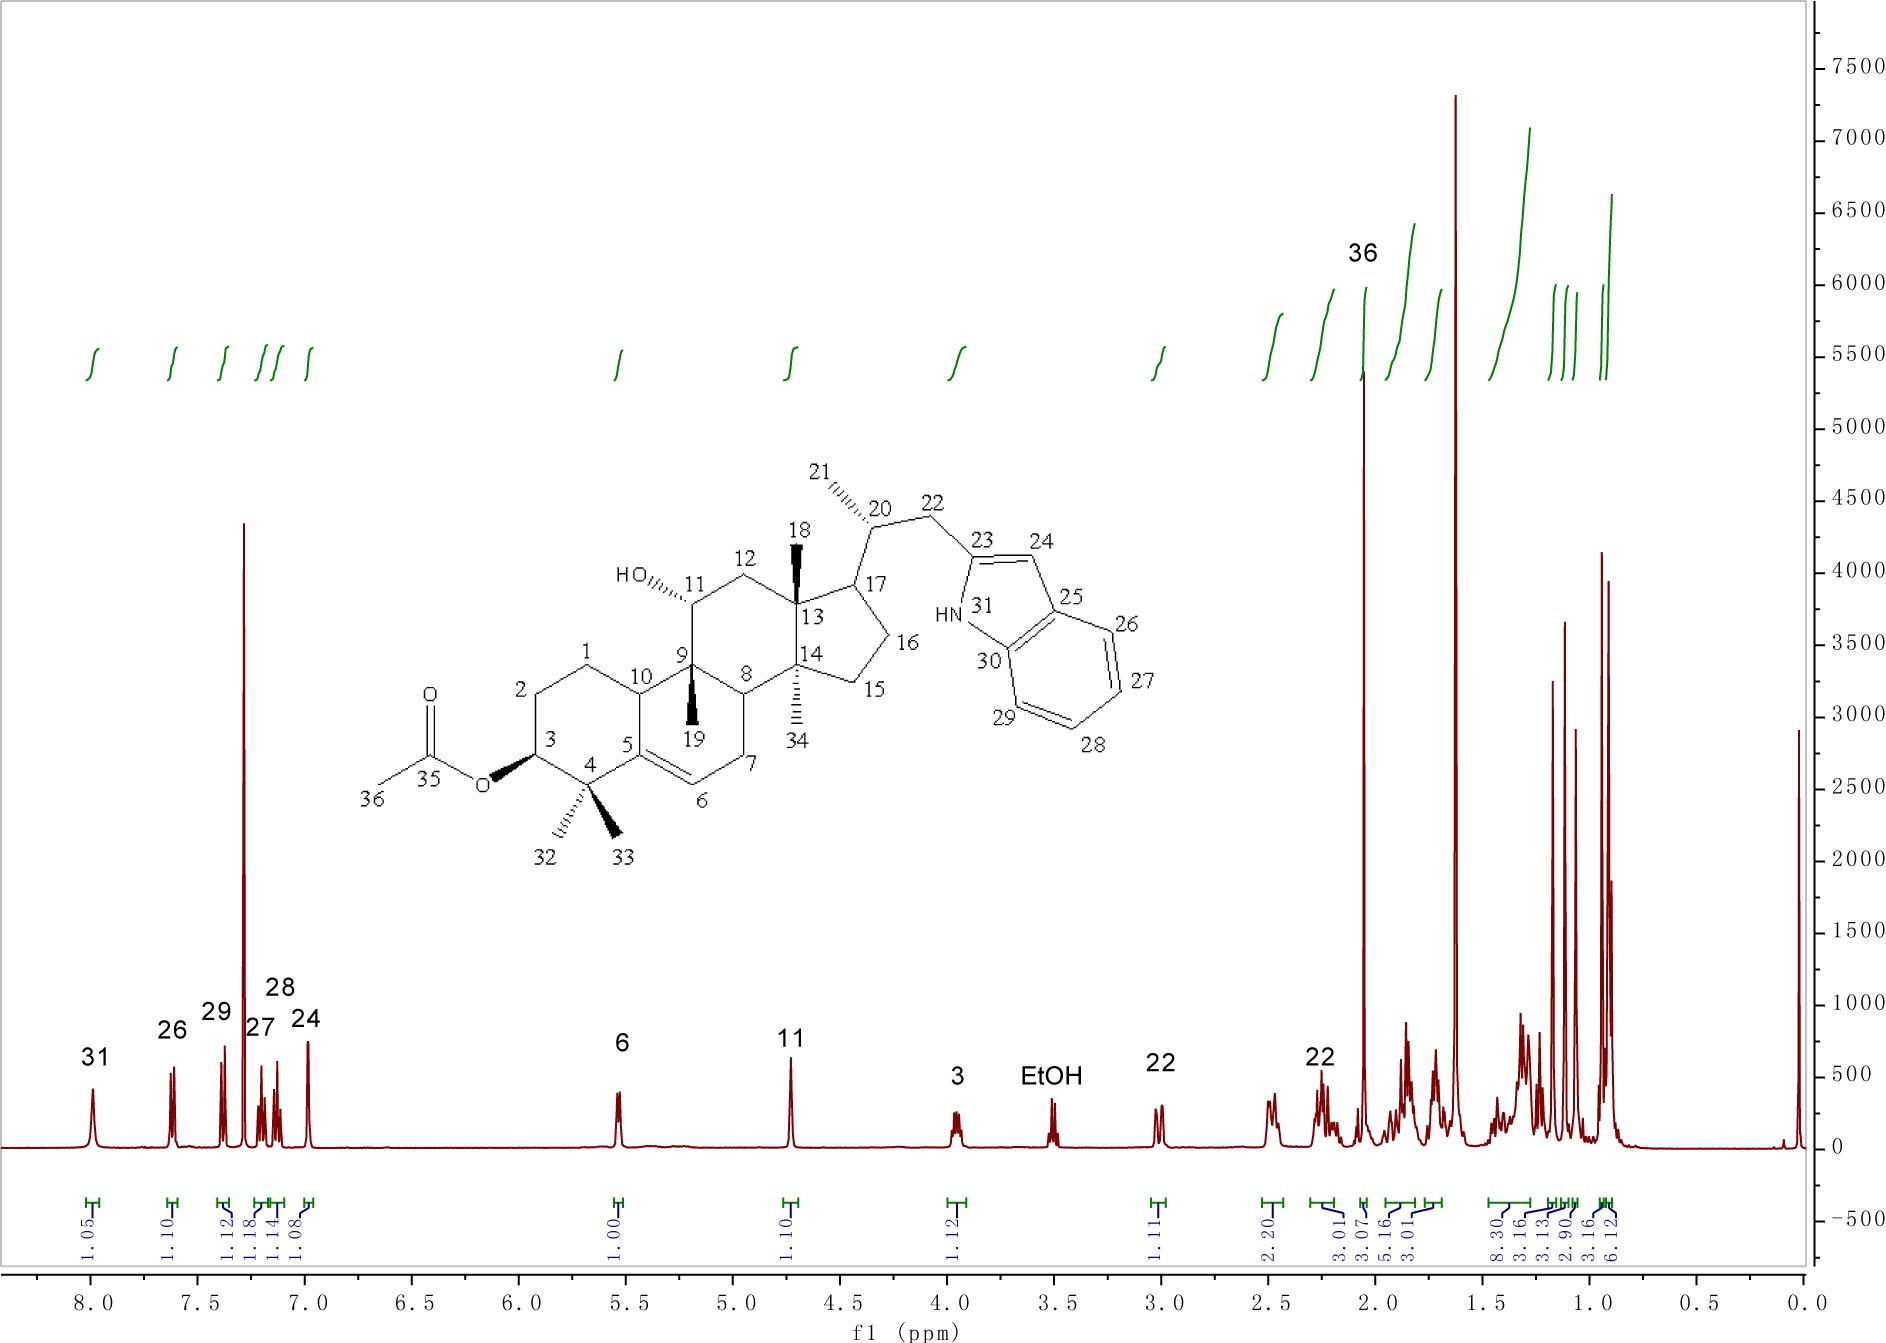


Fig. S36. 1H NMR of compound **16**.


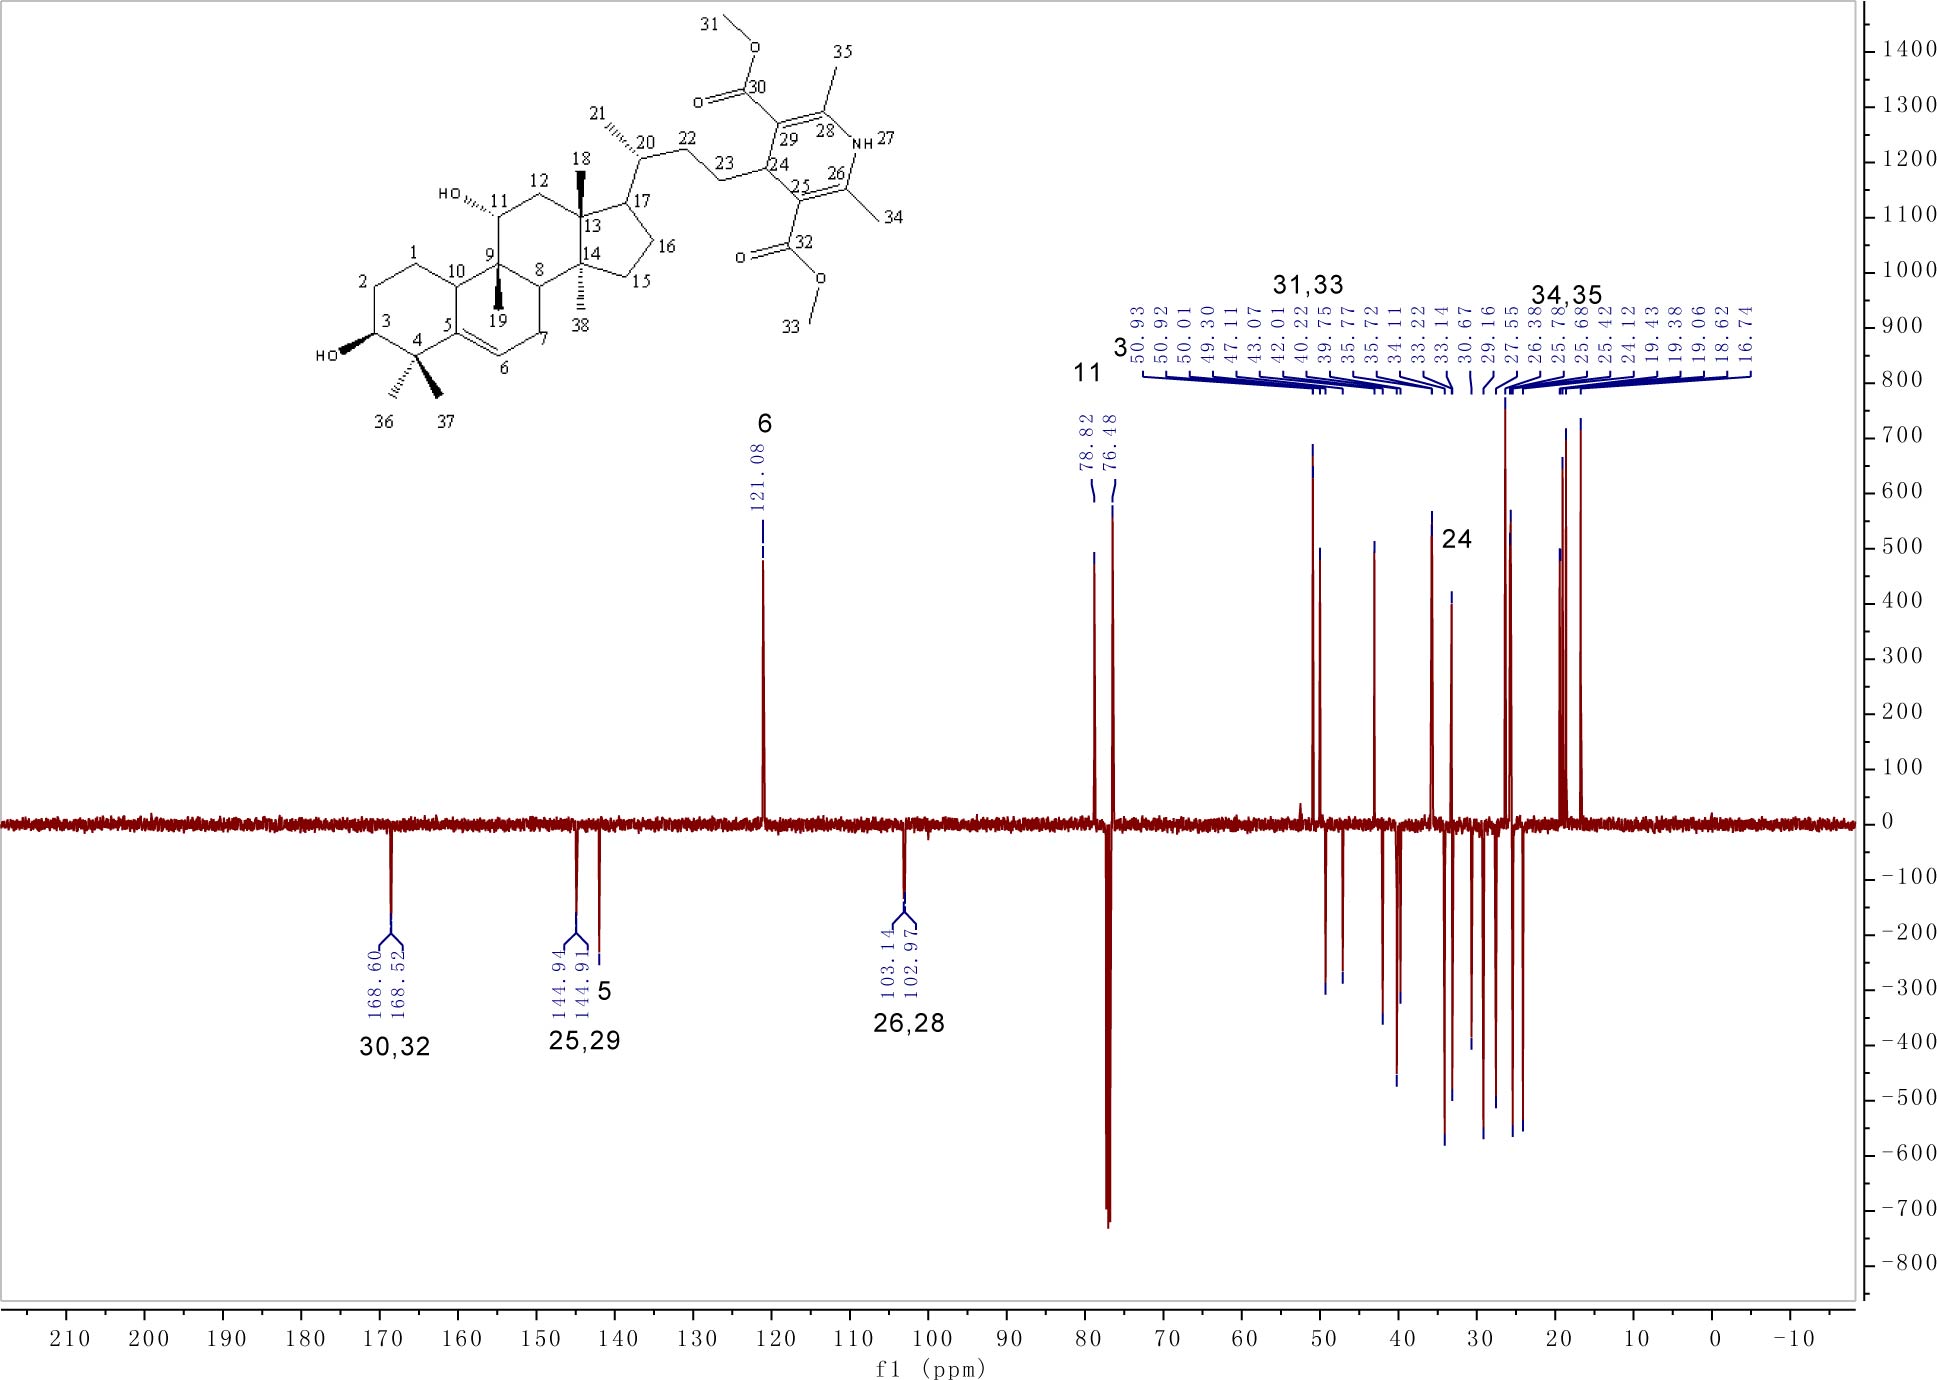


Fig. S37. 13C NMR (DEPTQ) of compound **17**.


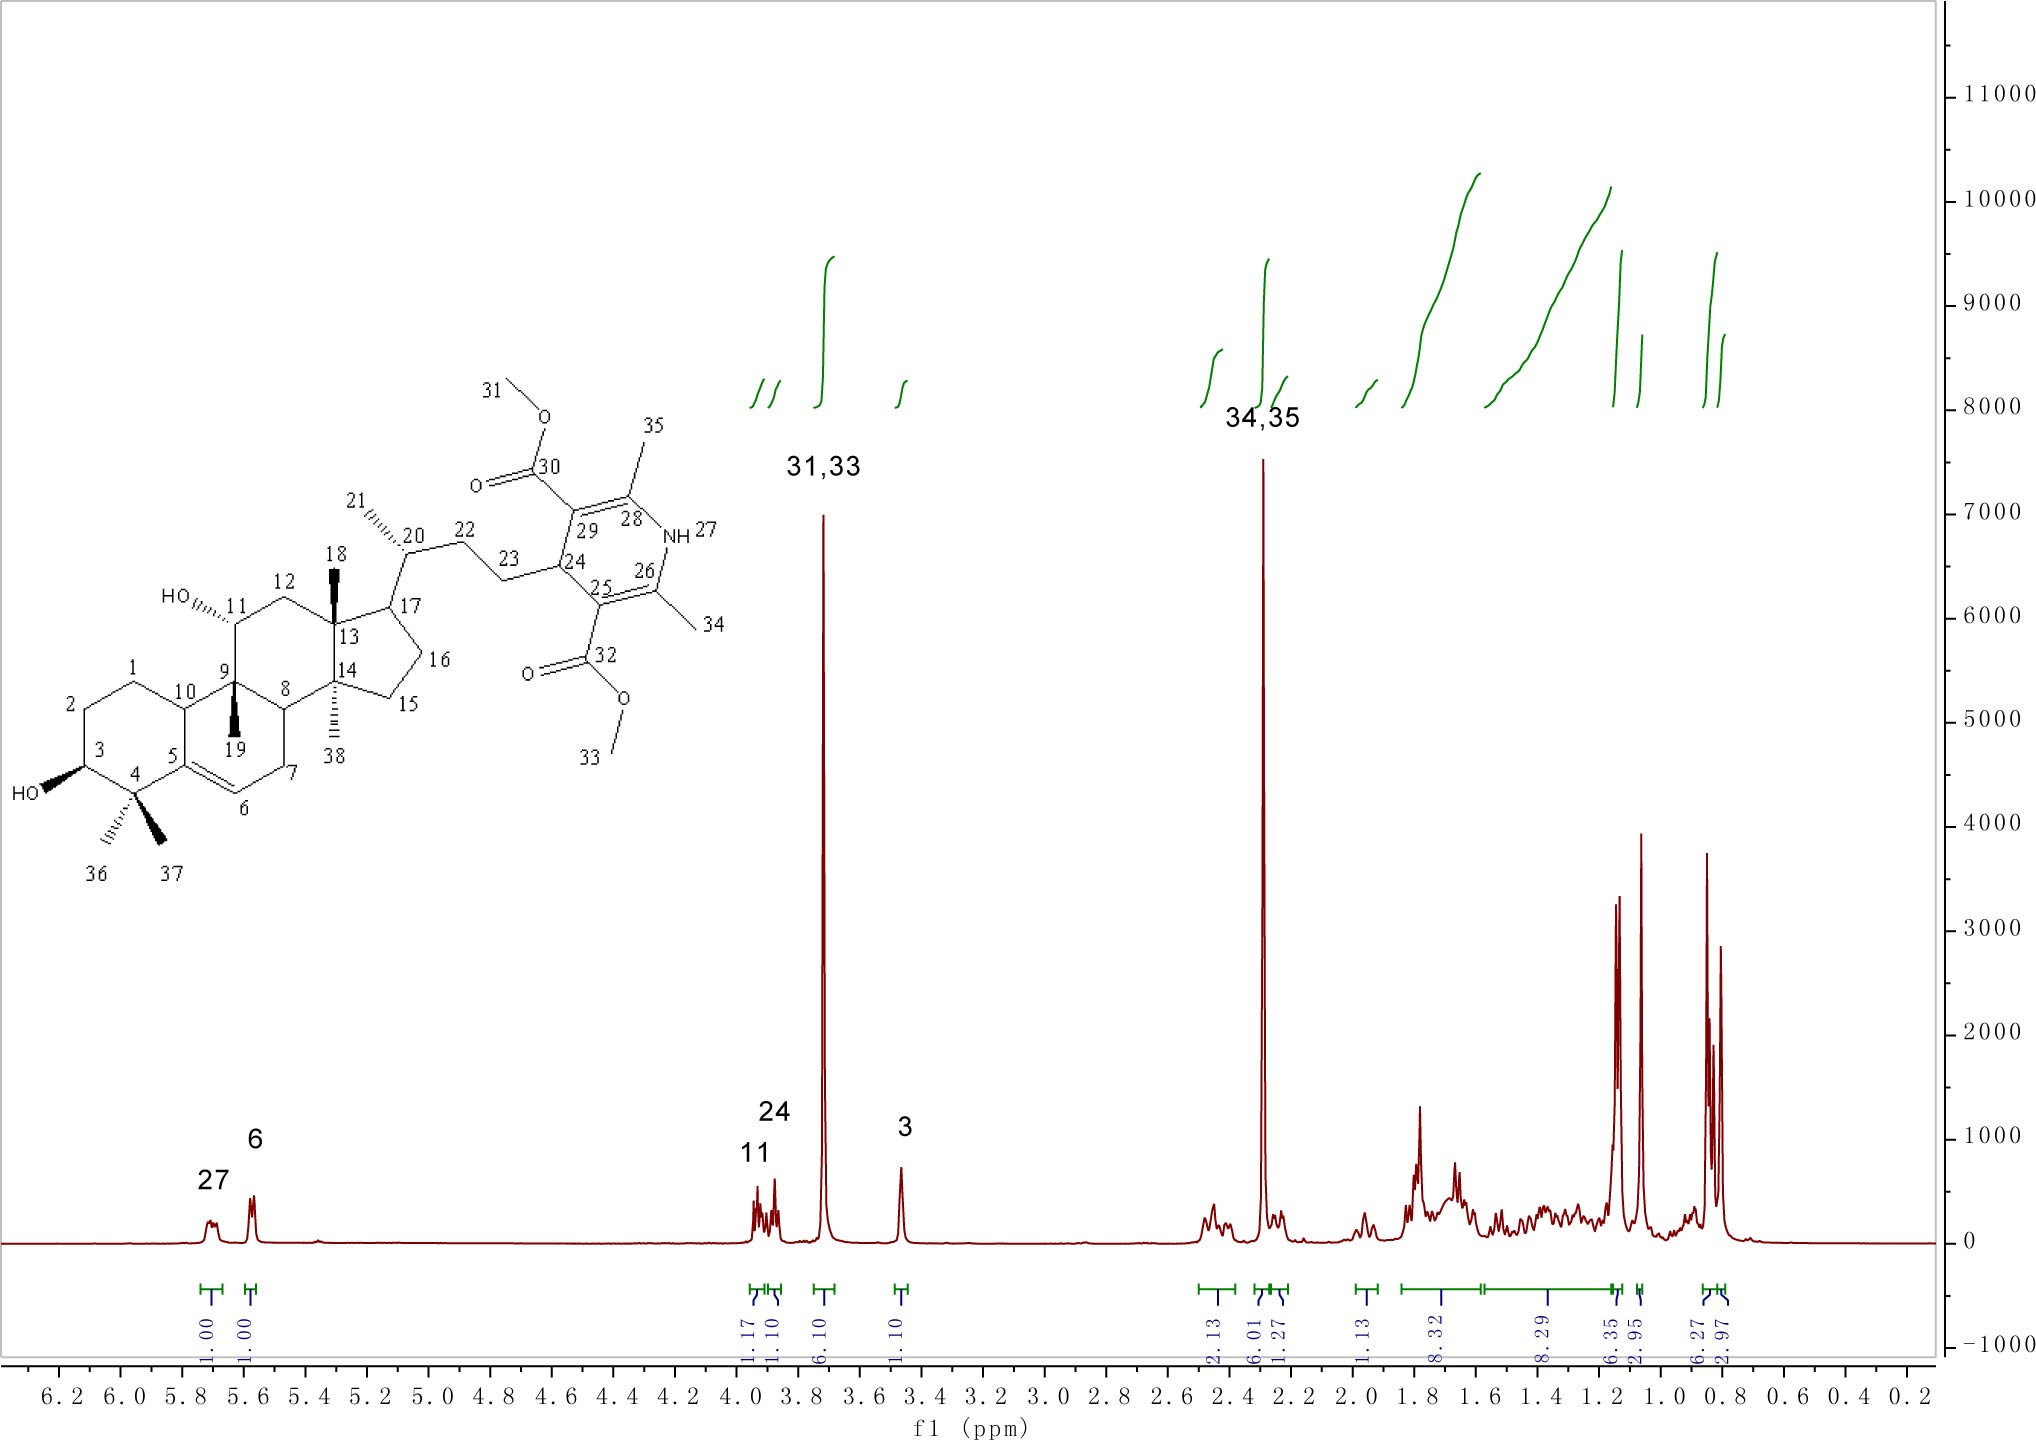


Fig. S38. 1H NMR of compound **17**.


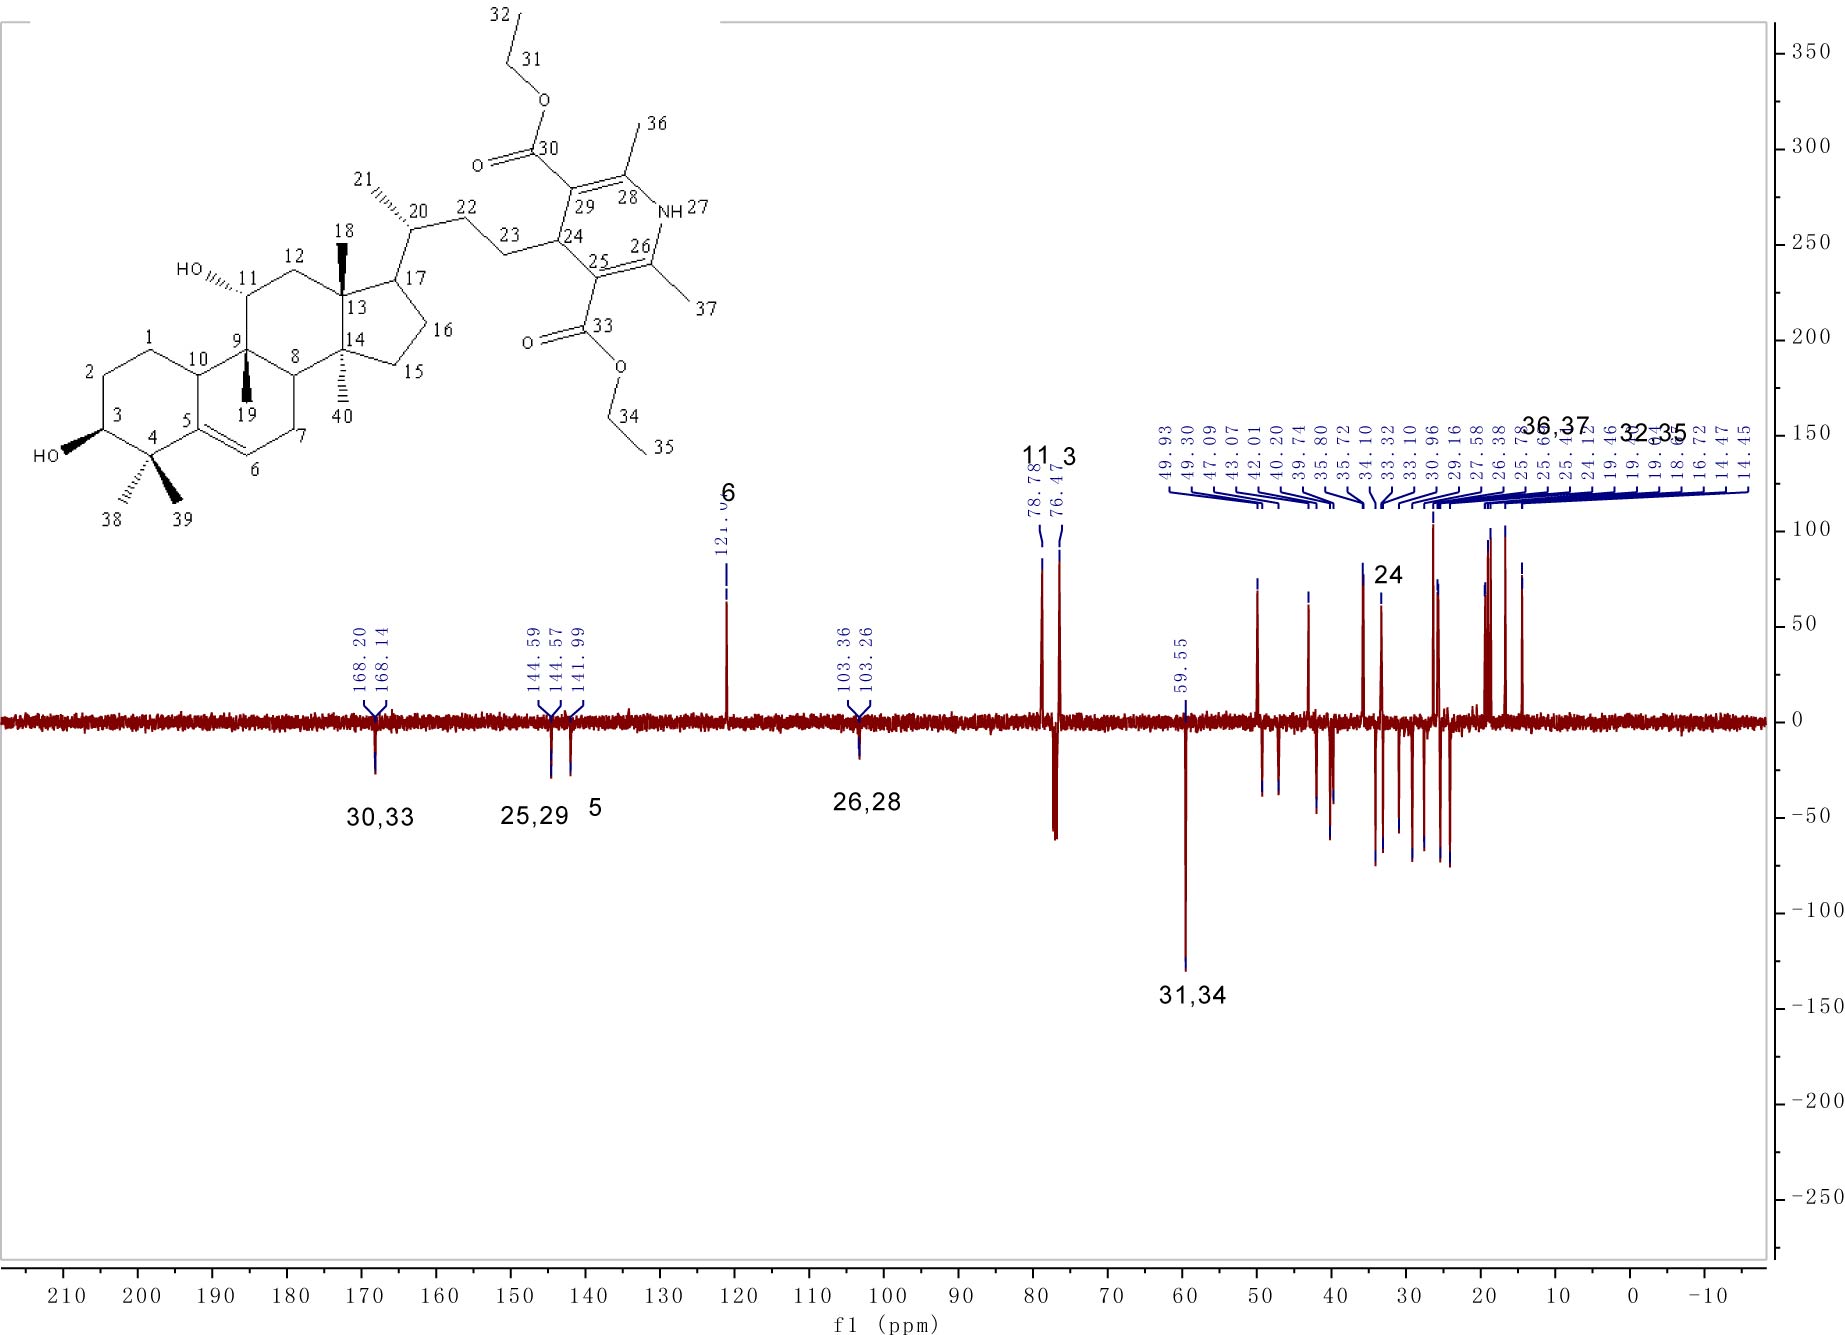


Fig. S30. 13C NMR (DEPTQ) of compound **18**.


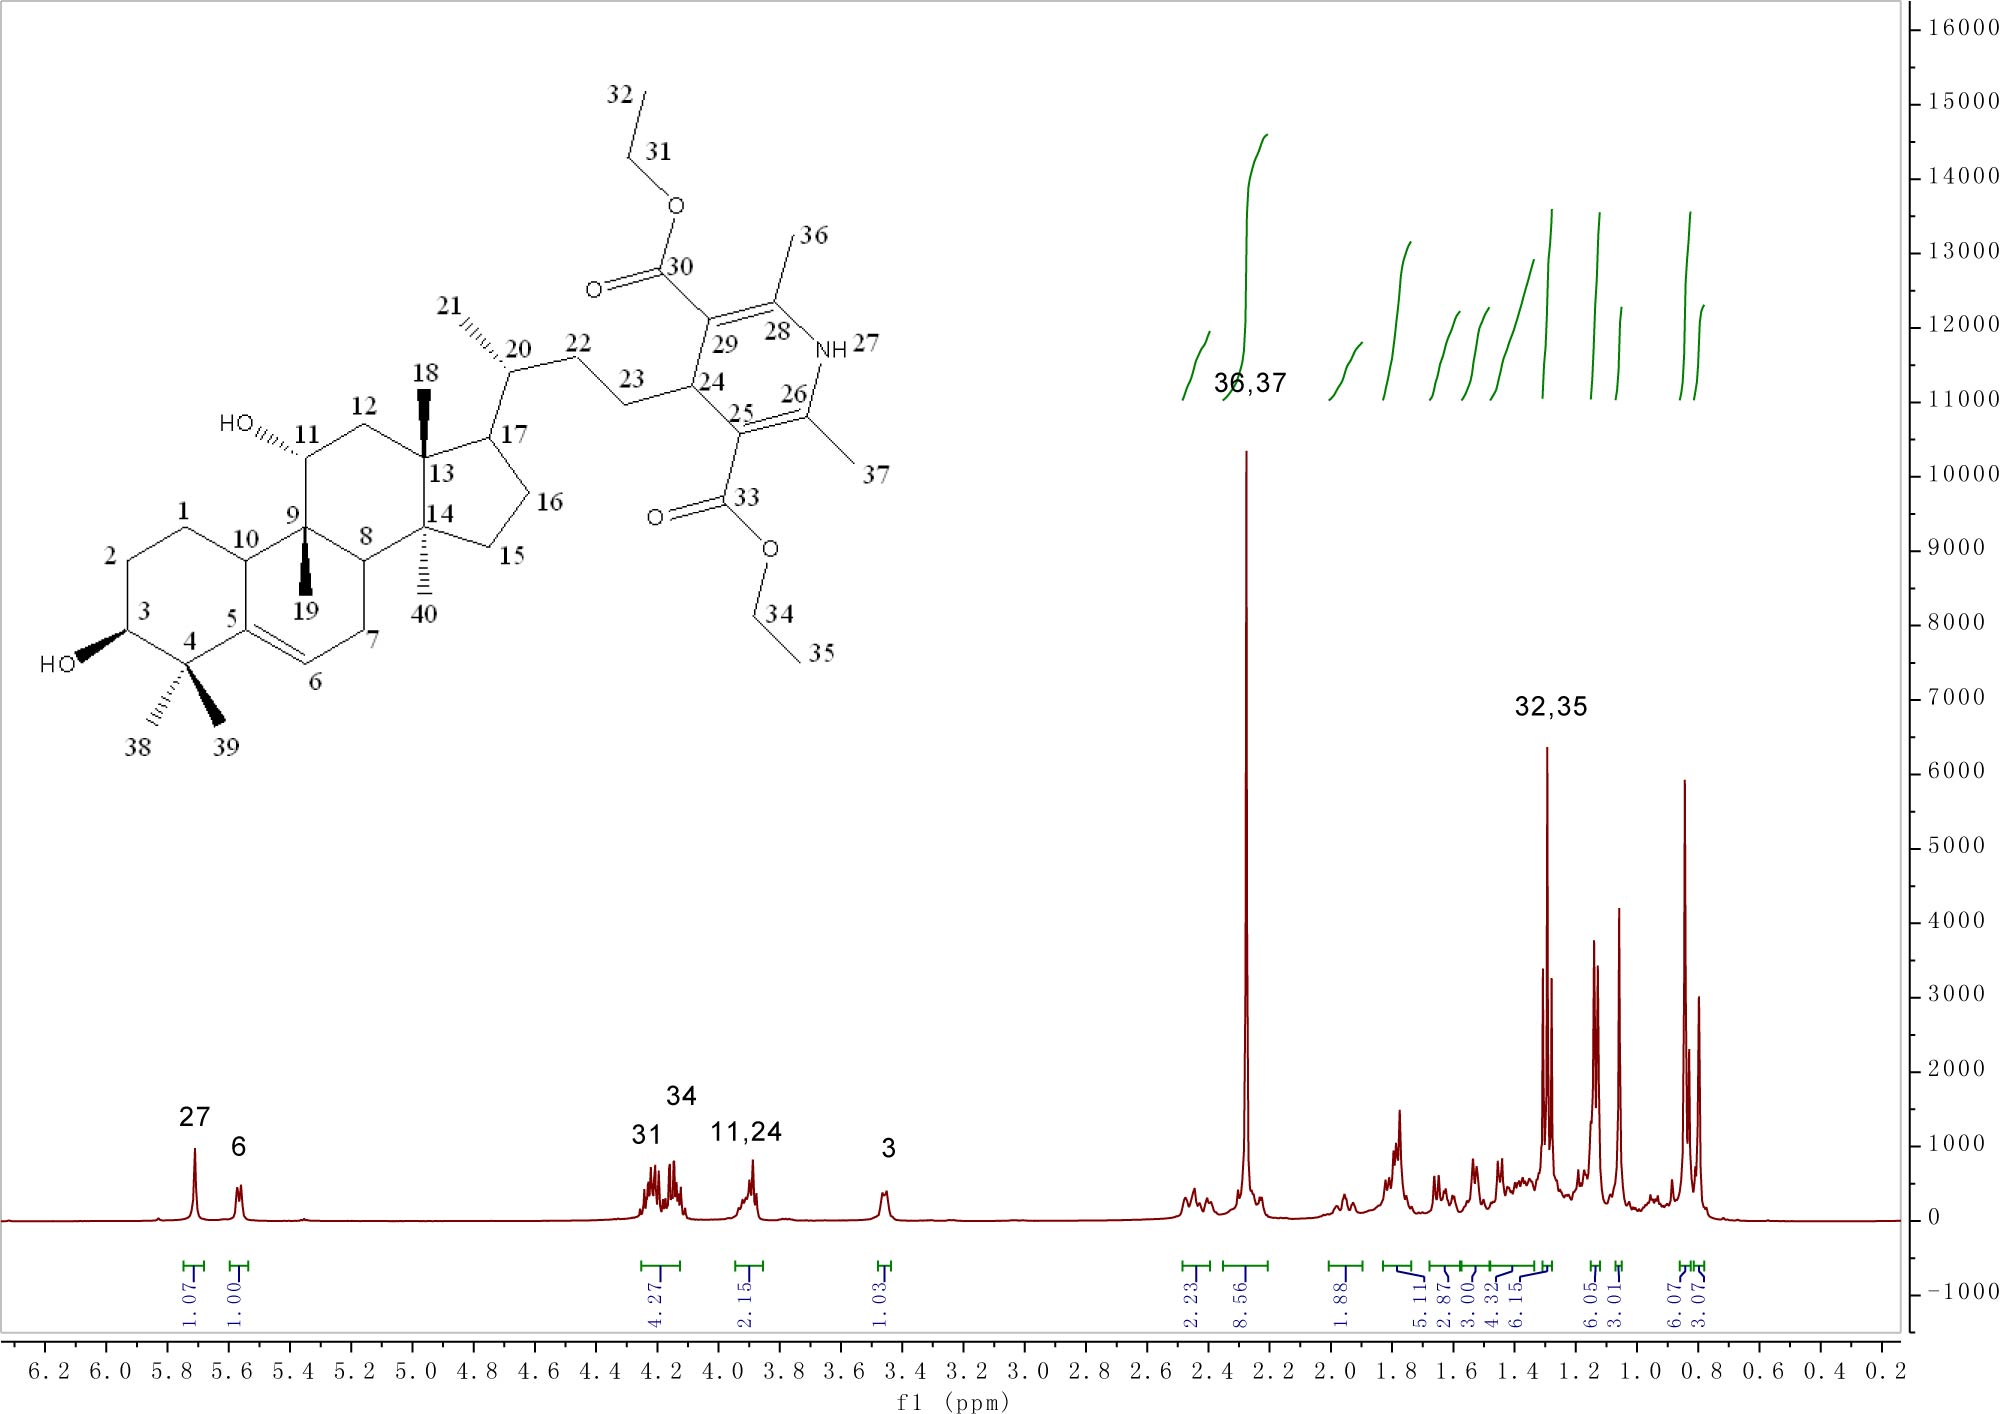


Fig. S40. 1H NMR of compound **18**.


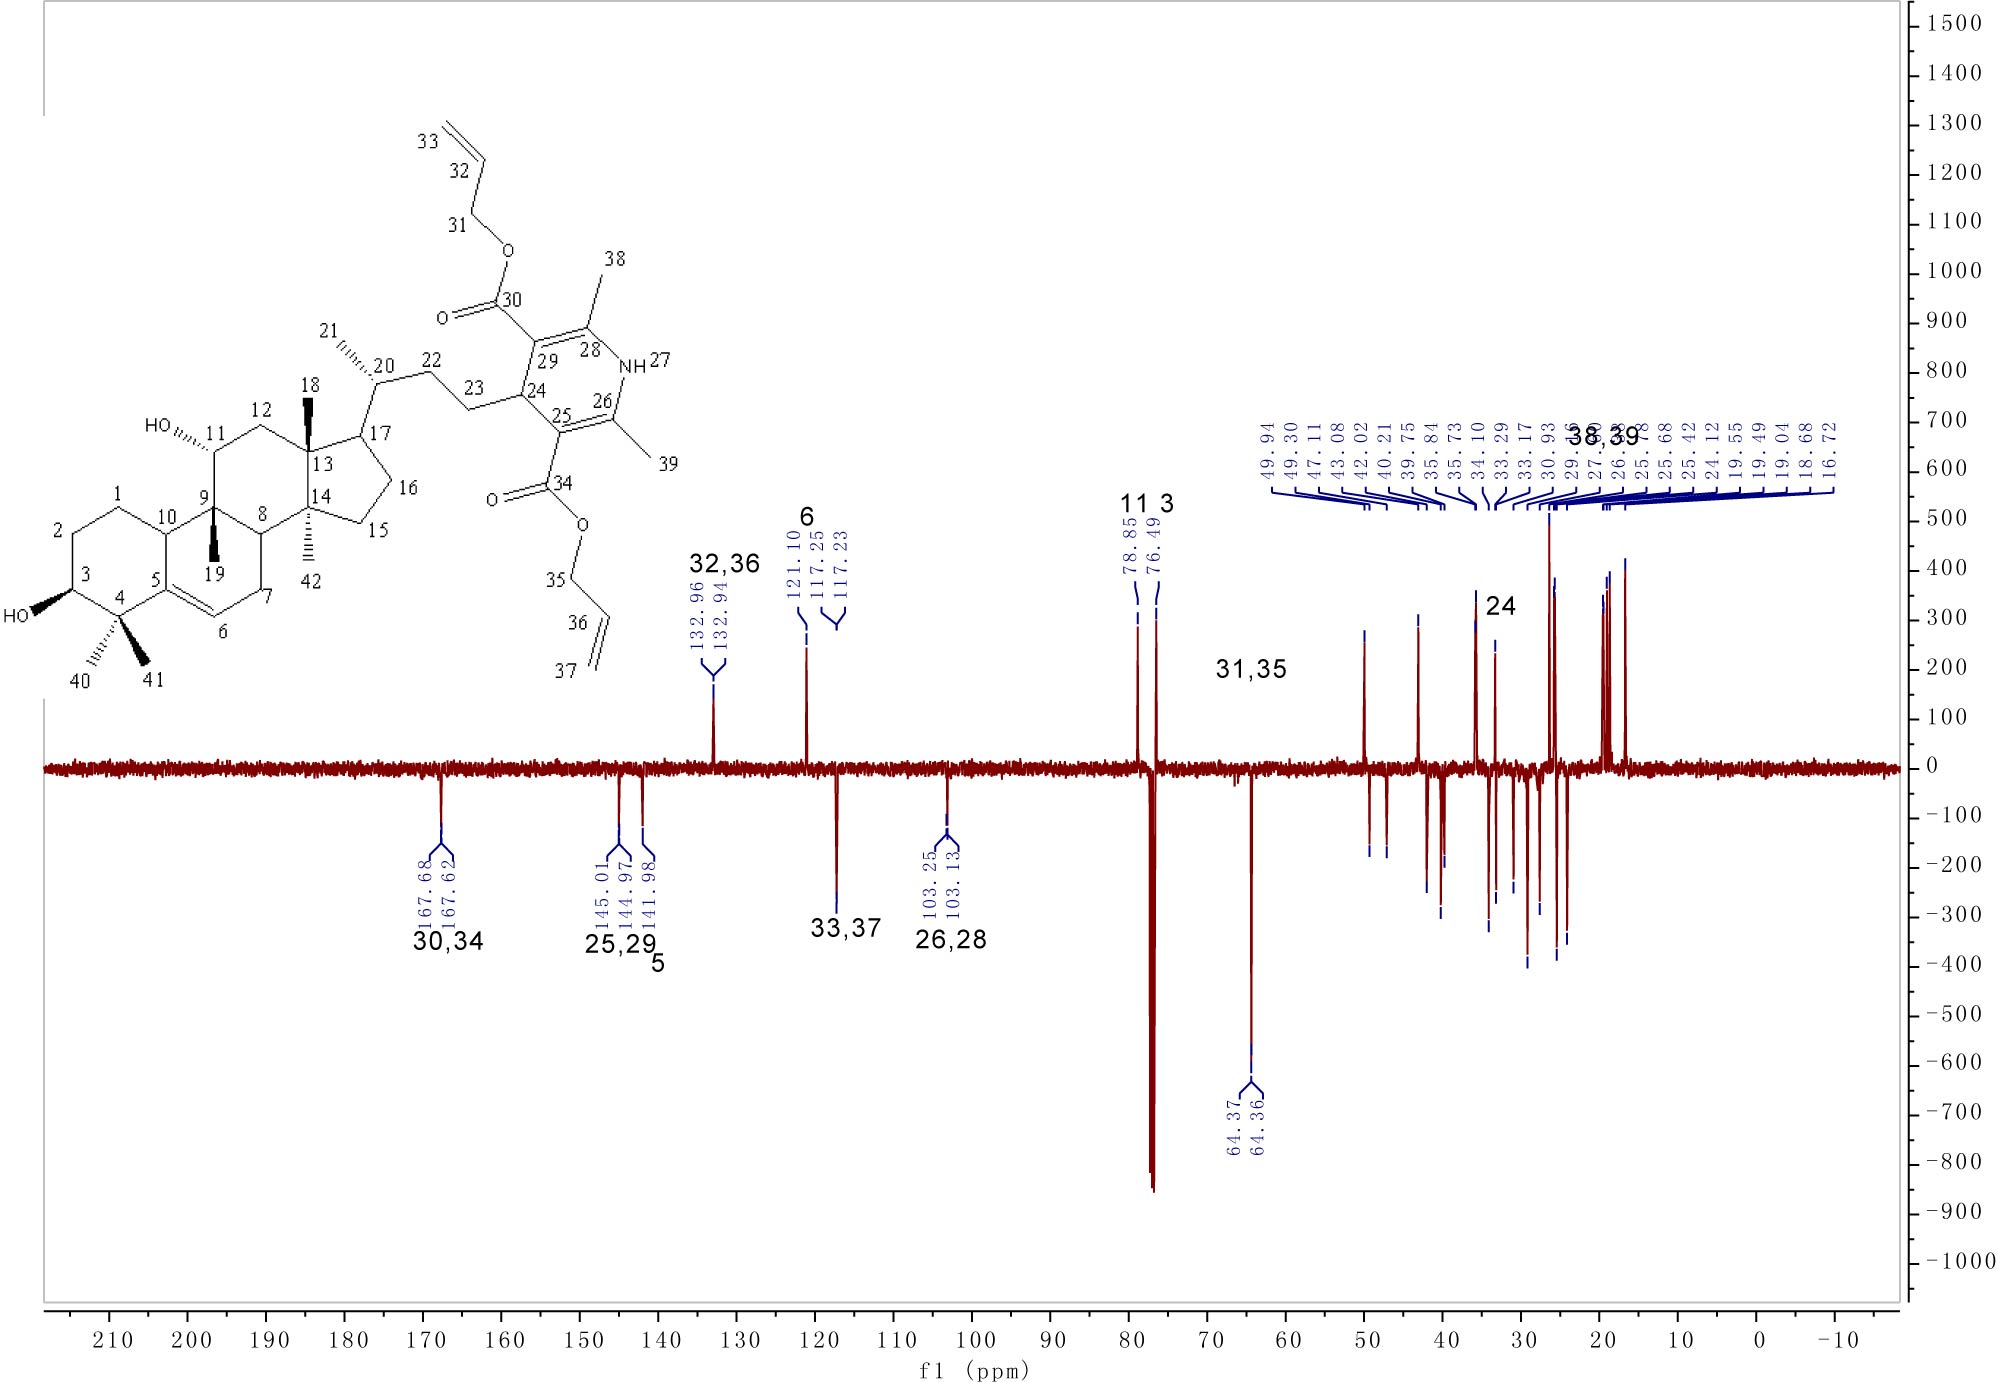


Fig. S41. 13C NMR (DEPTQ) of compound **19**.


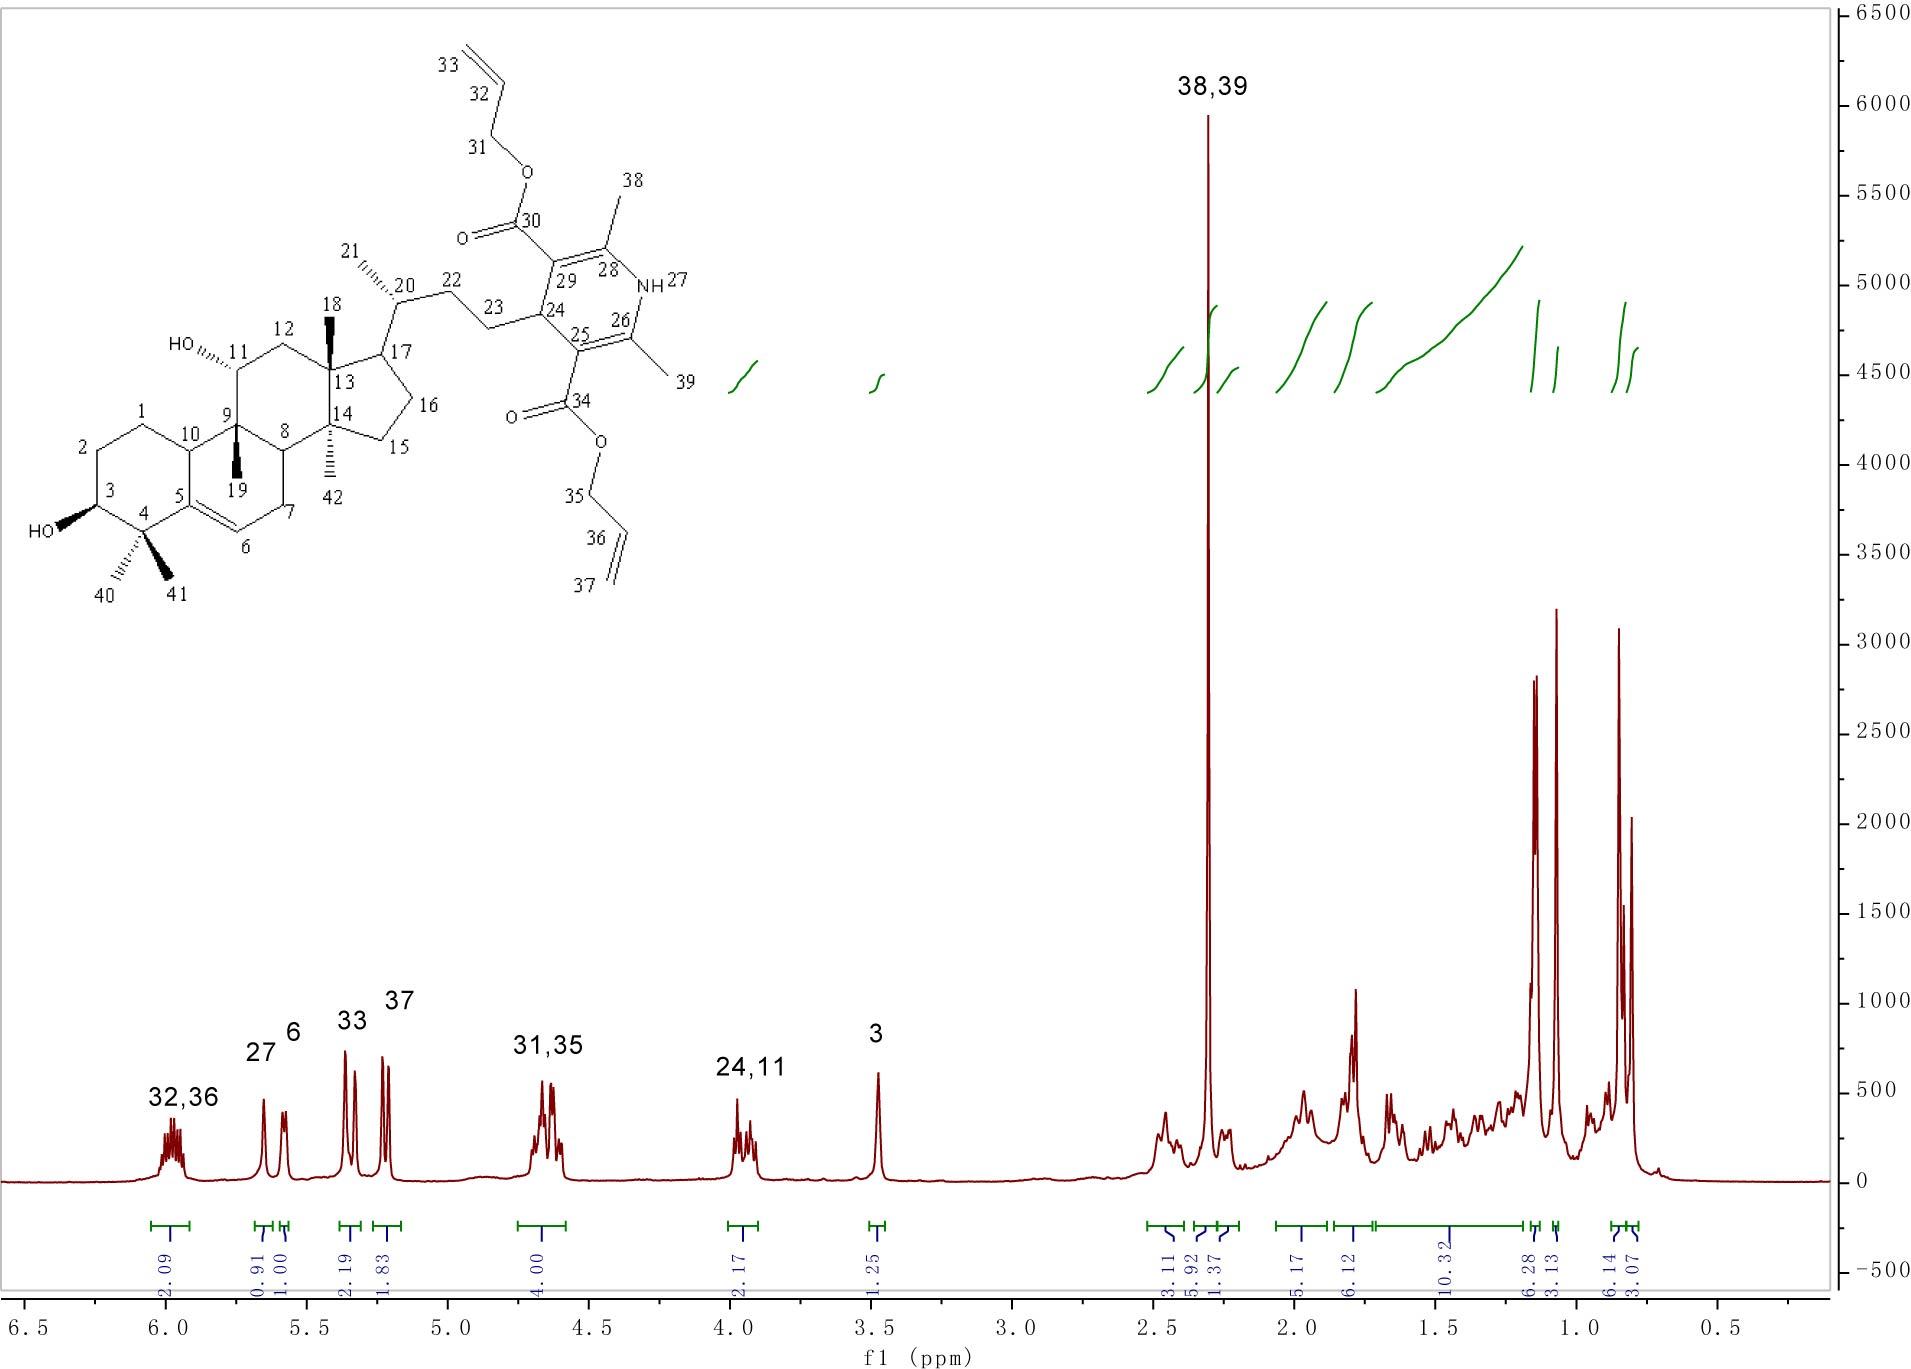


Fig. S42. 1H NMR of compound **19**.


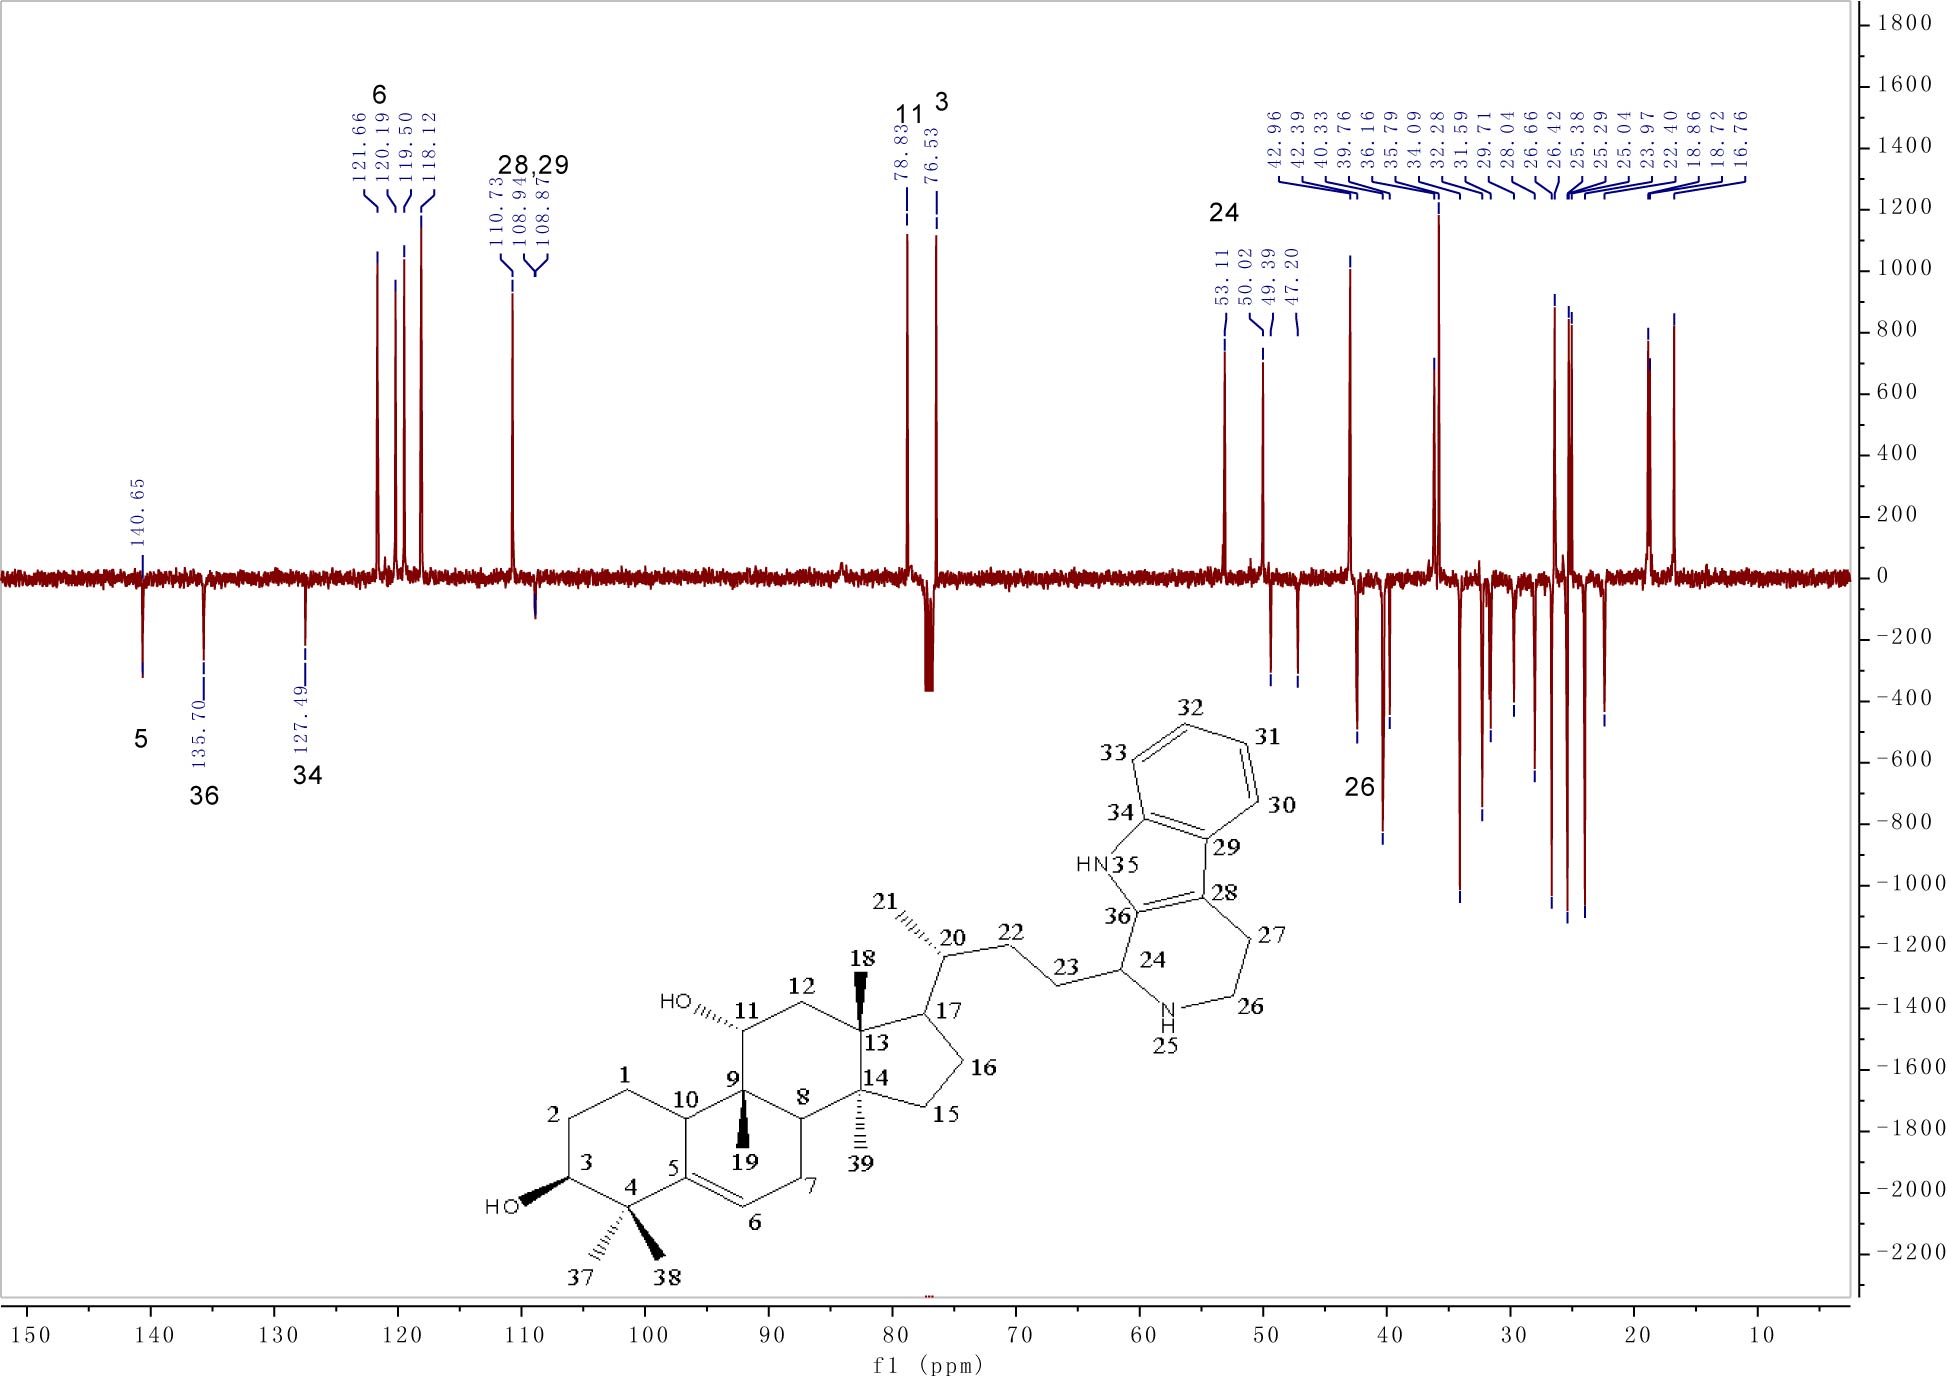


Fig. S43. 13C NMR (DEPTQ) of compound **20**.


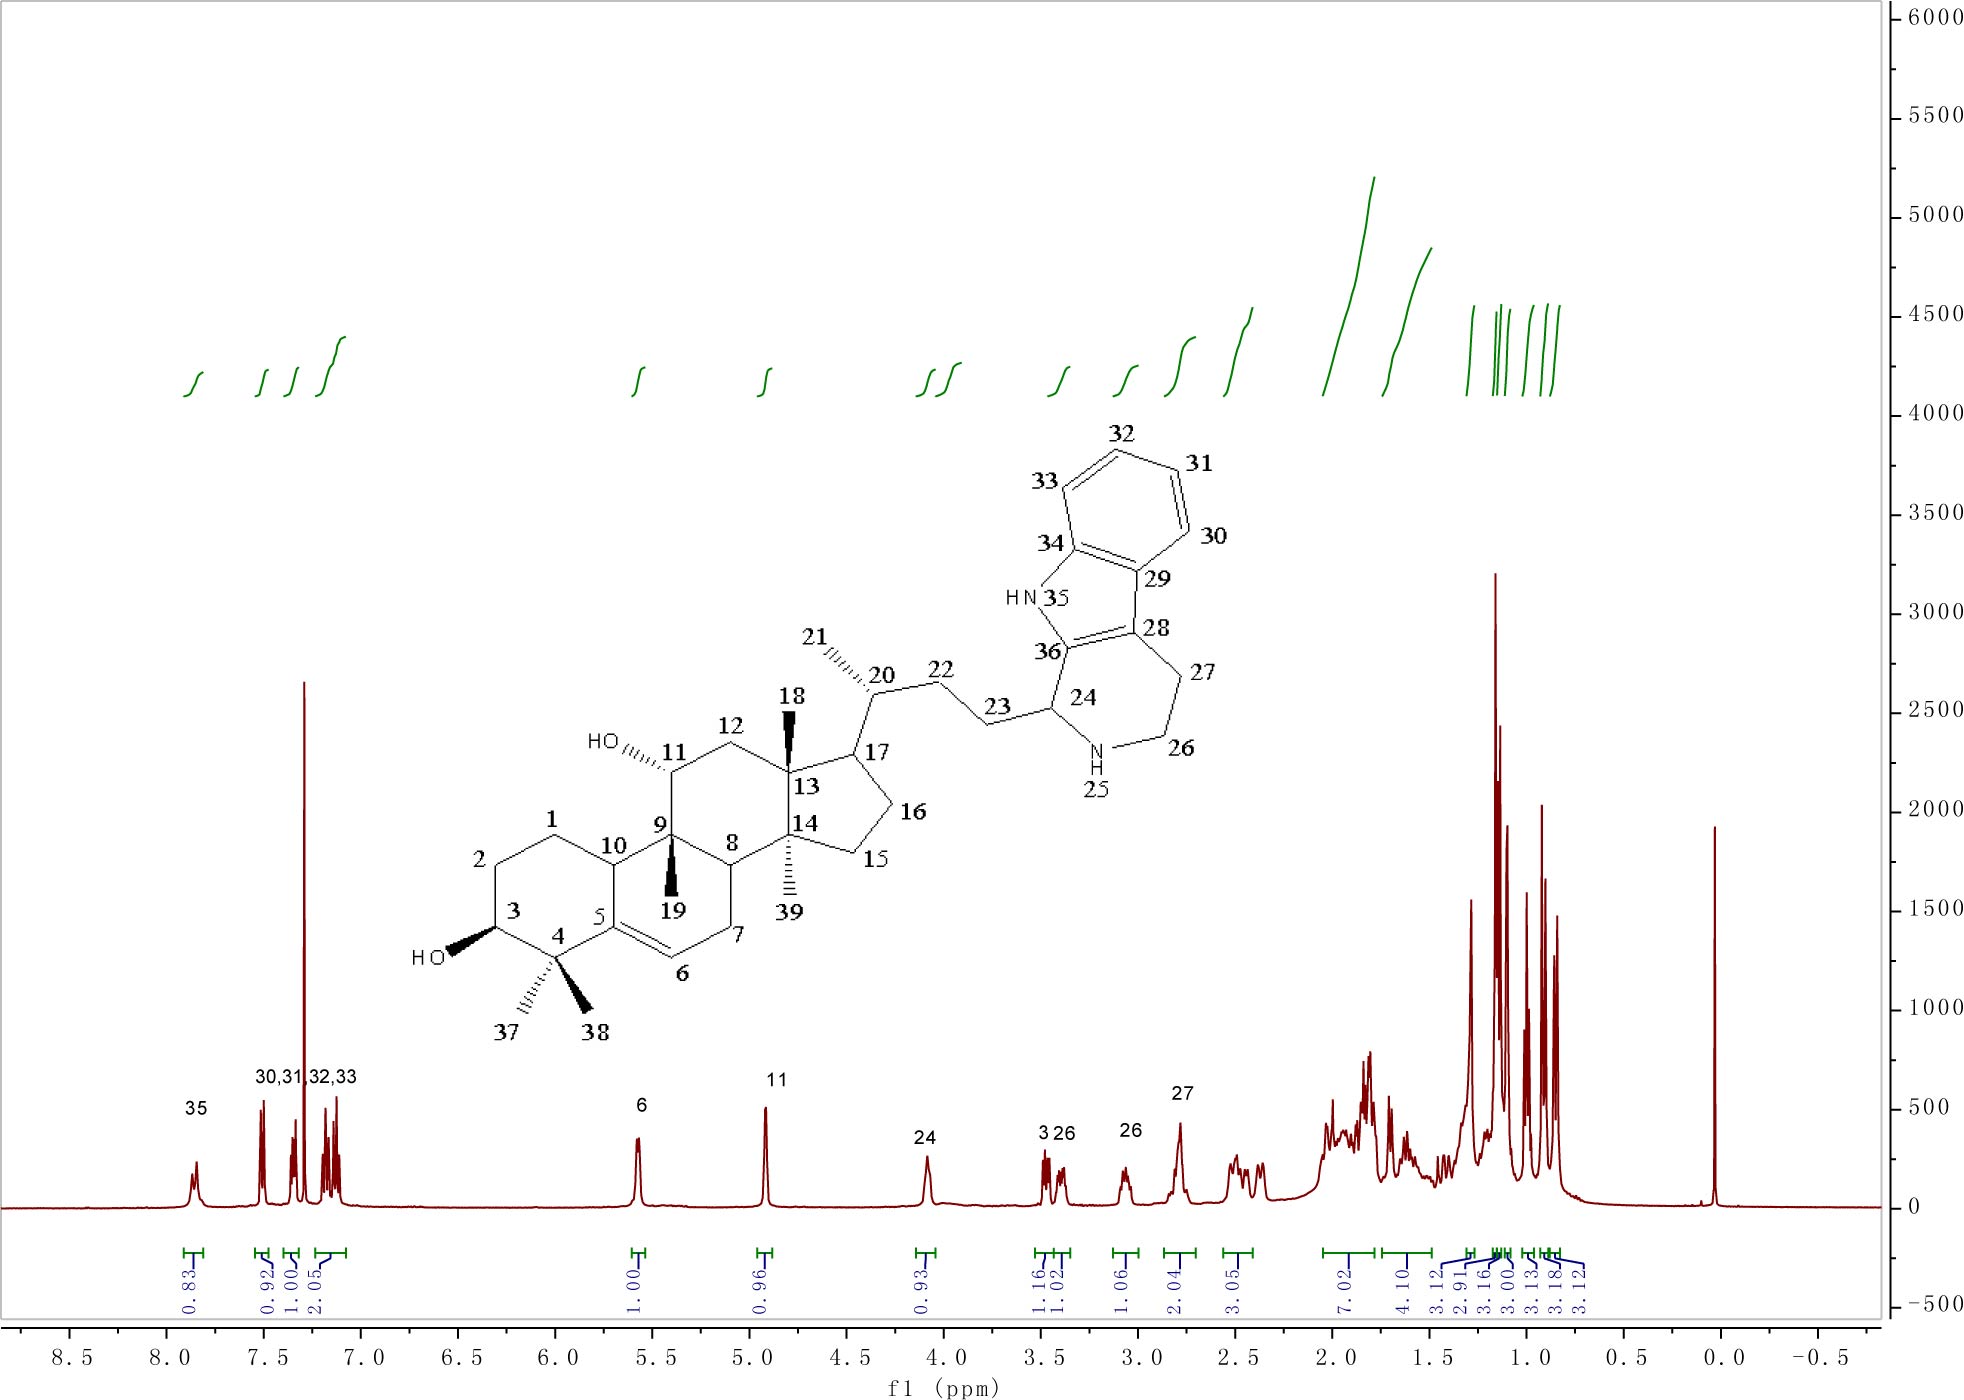


Fig. S44. 1H NMR of compound **20**.


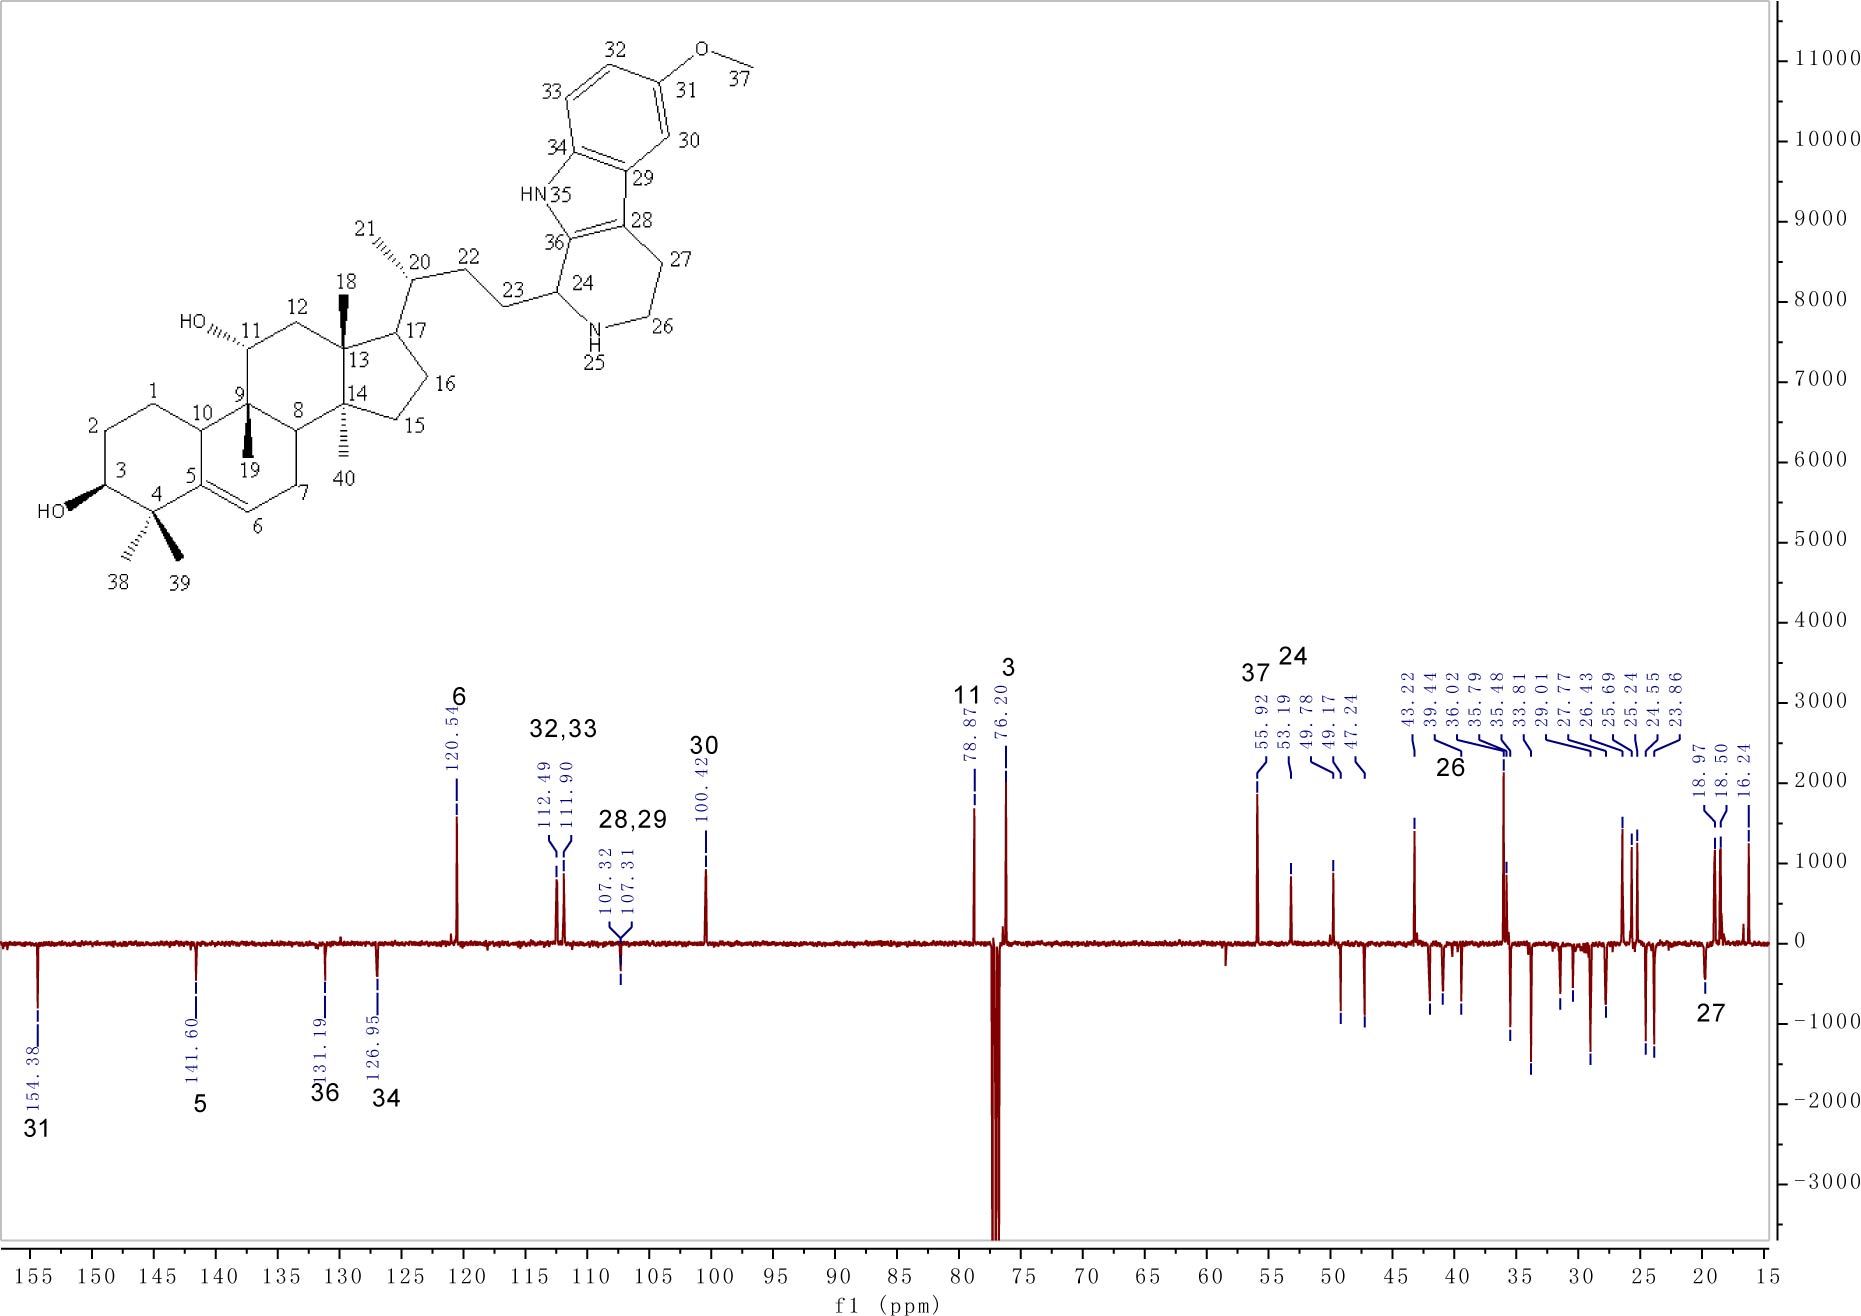


Fig. S45. 13C NMR (DEPTQ) of compound **21**.


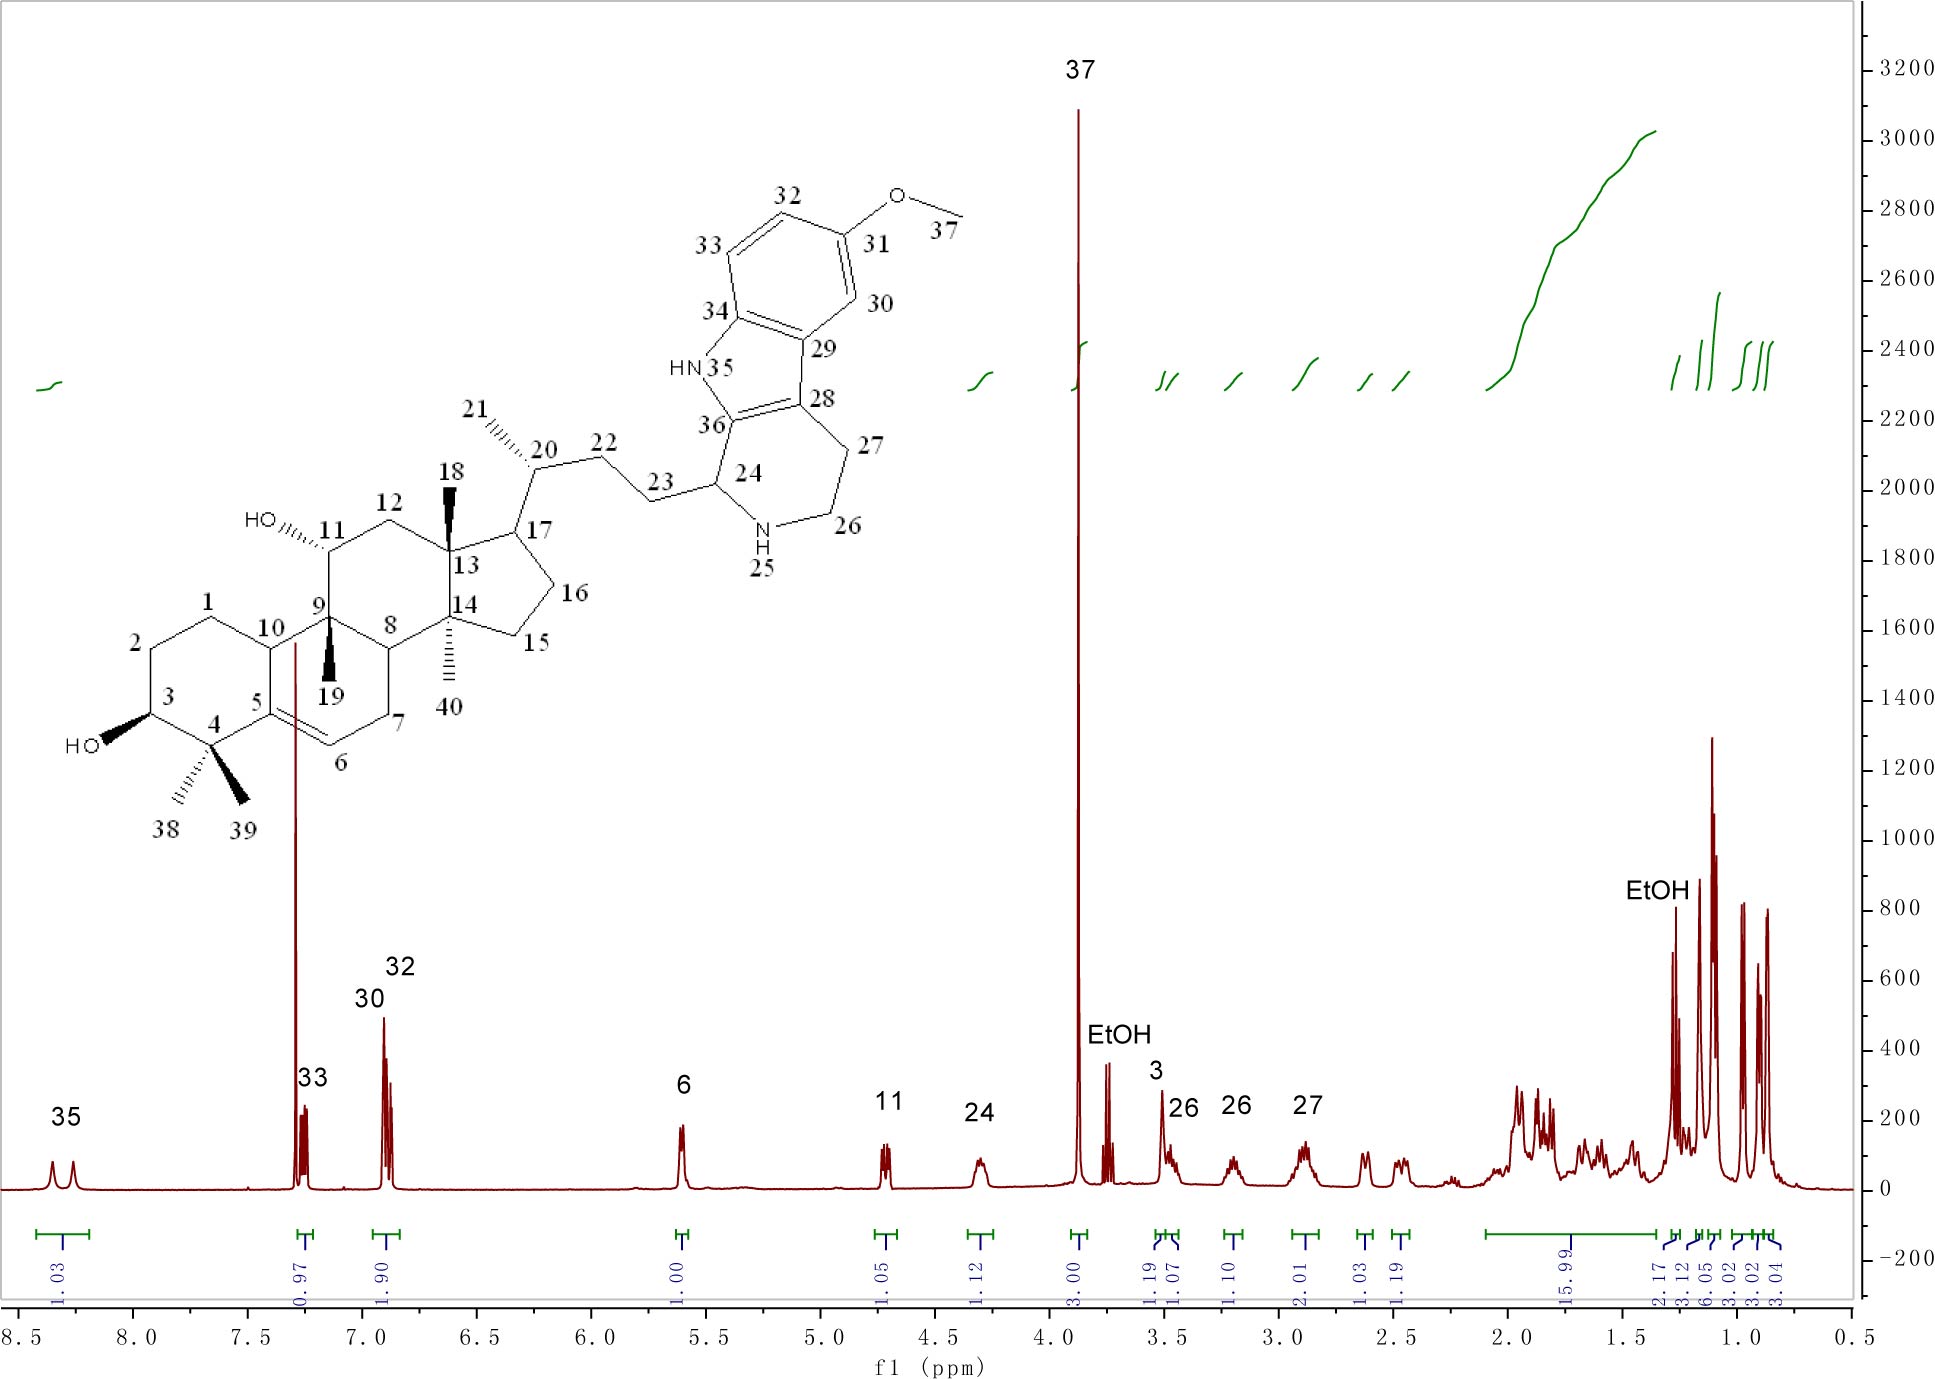


Fig. S46. 1H NMR of compound **21**.


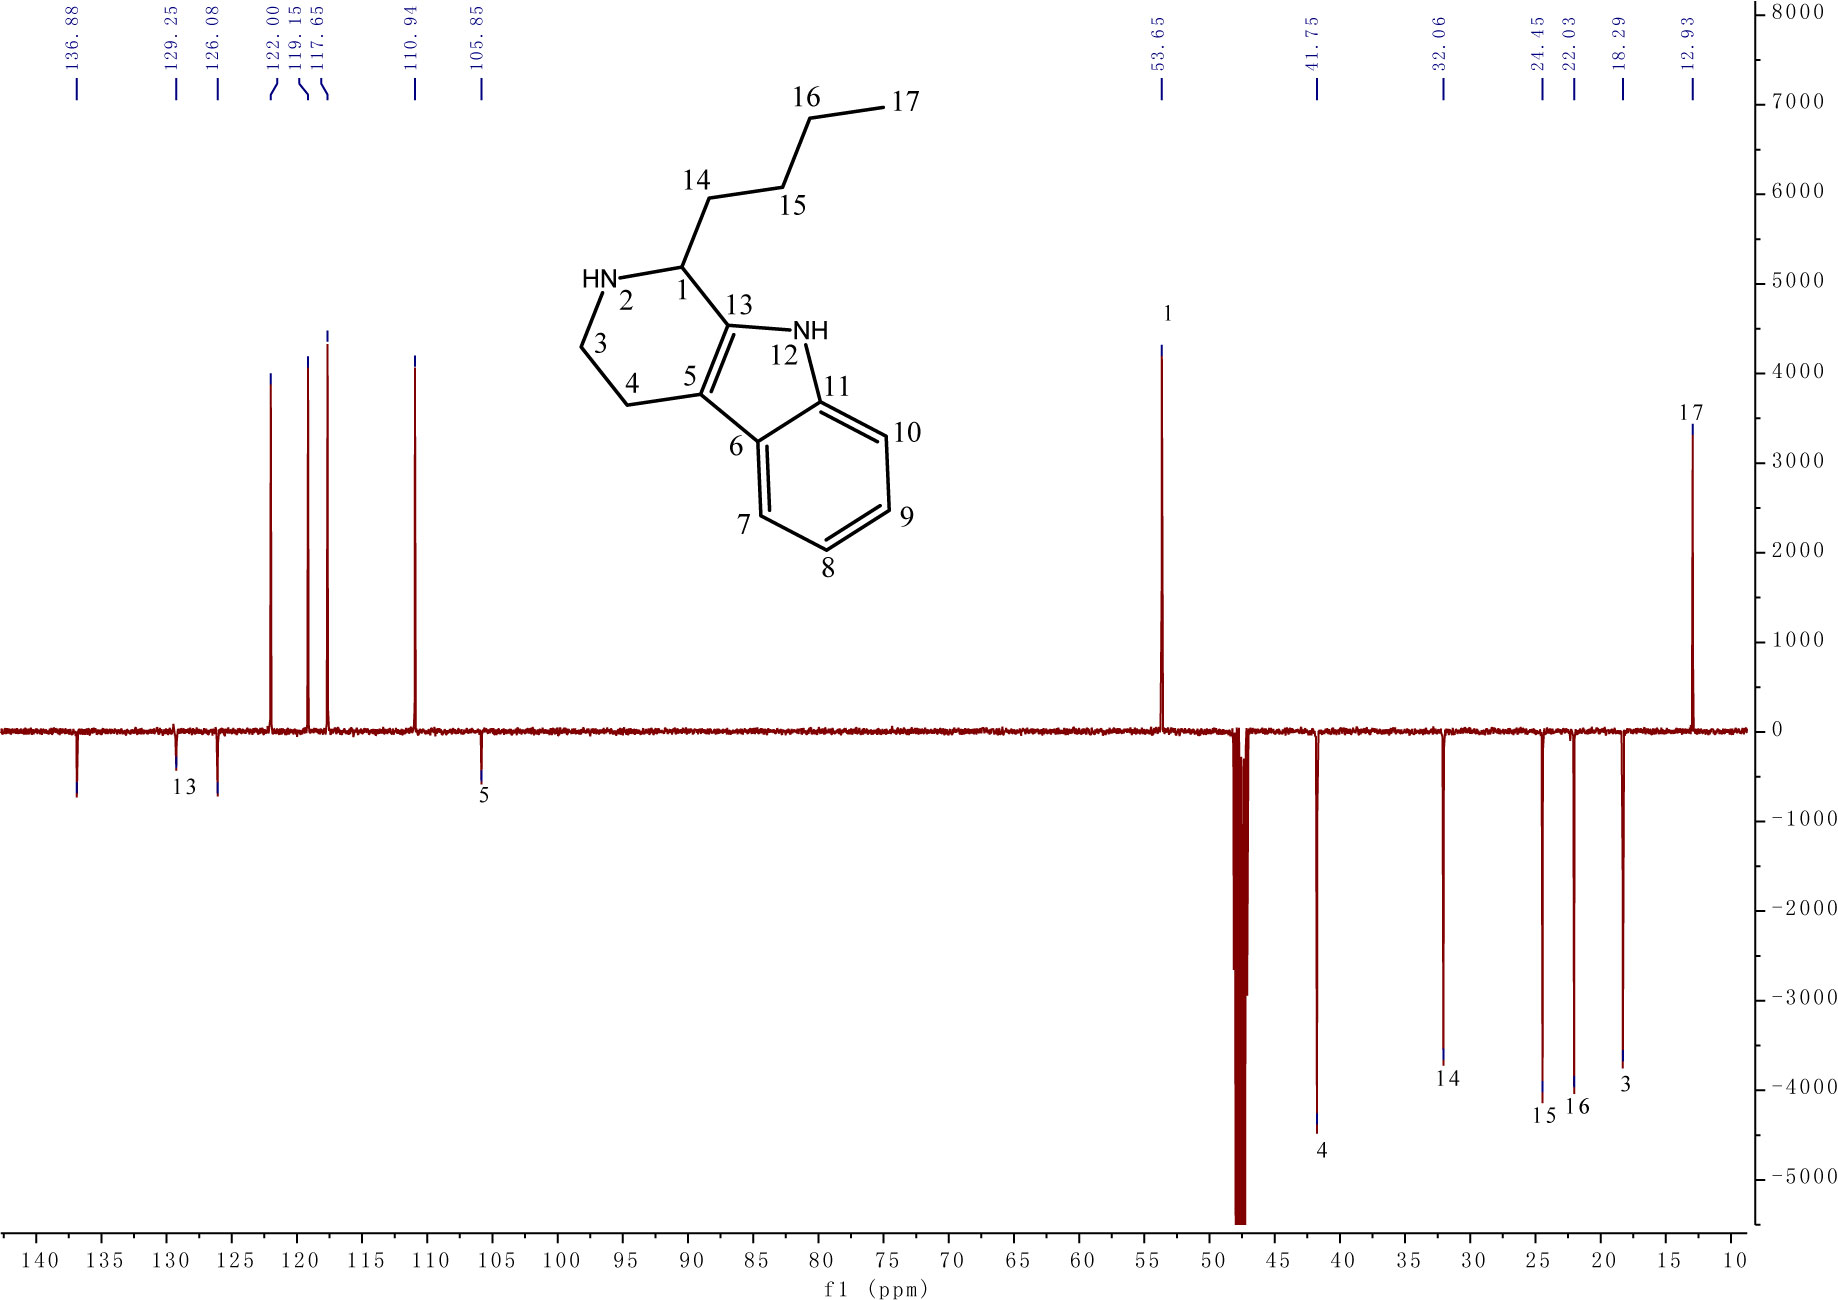


Fig. S47. 13C NMR (DEPTQ) of compound **22**.


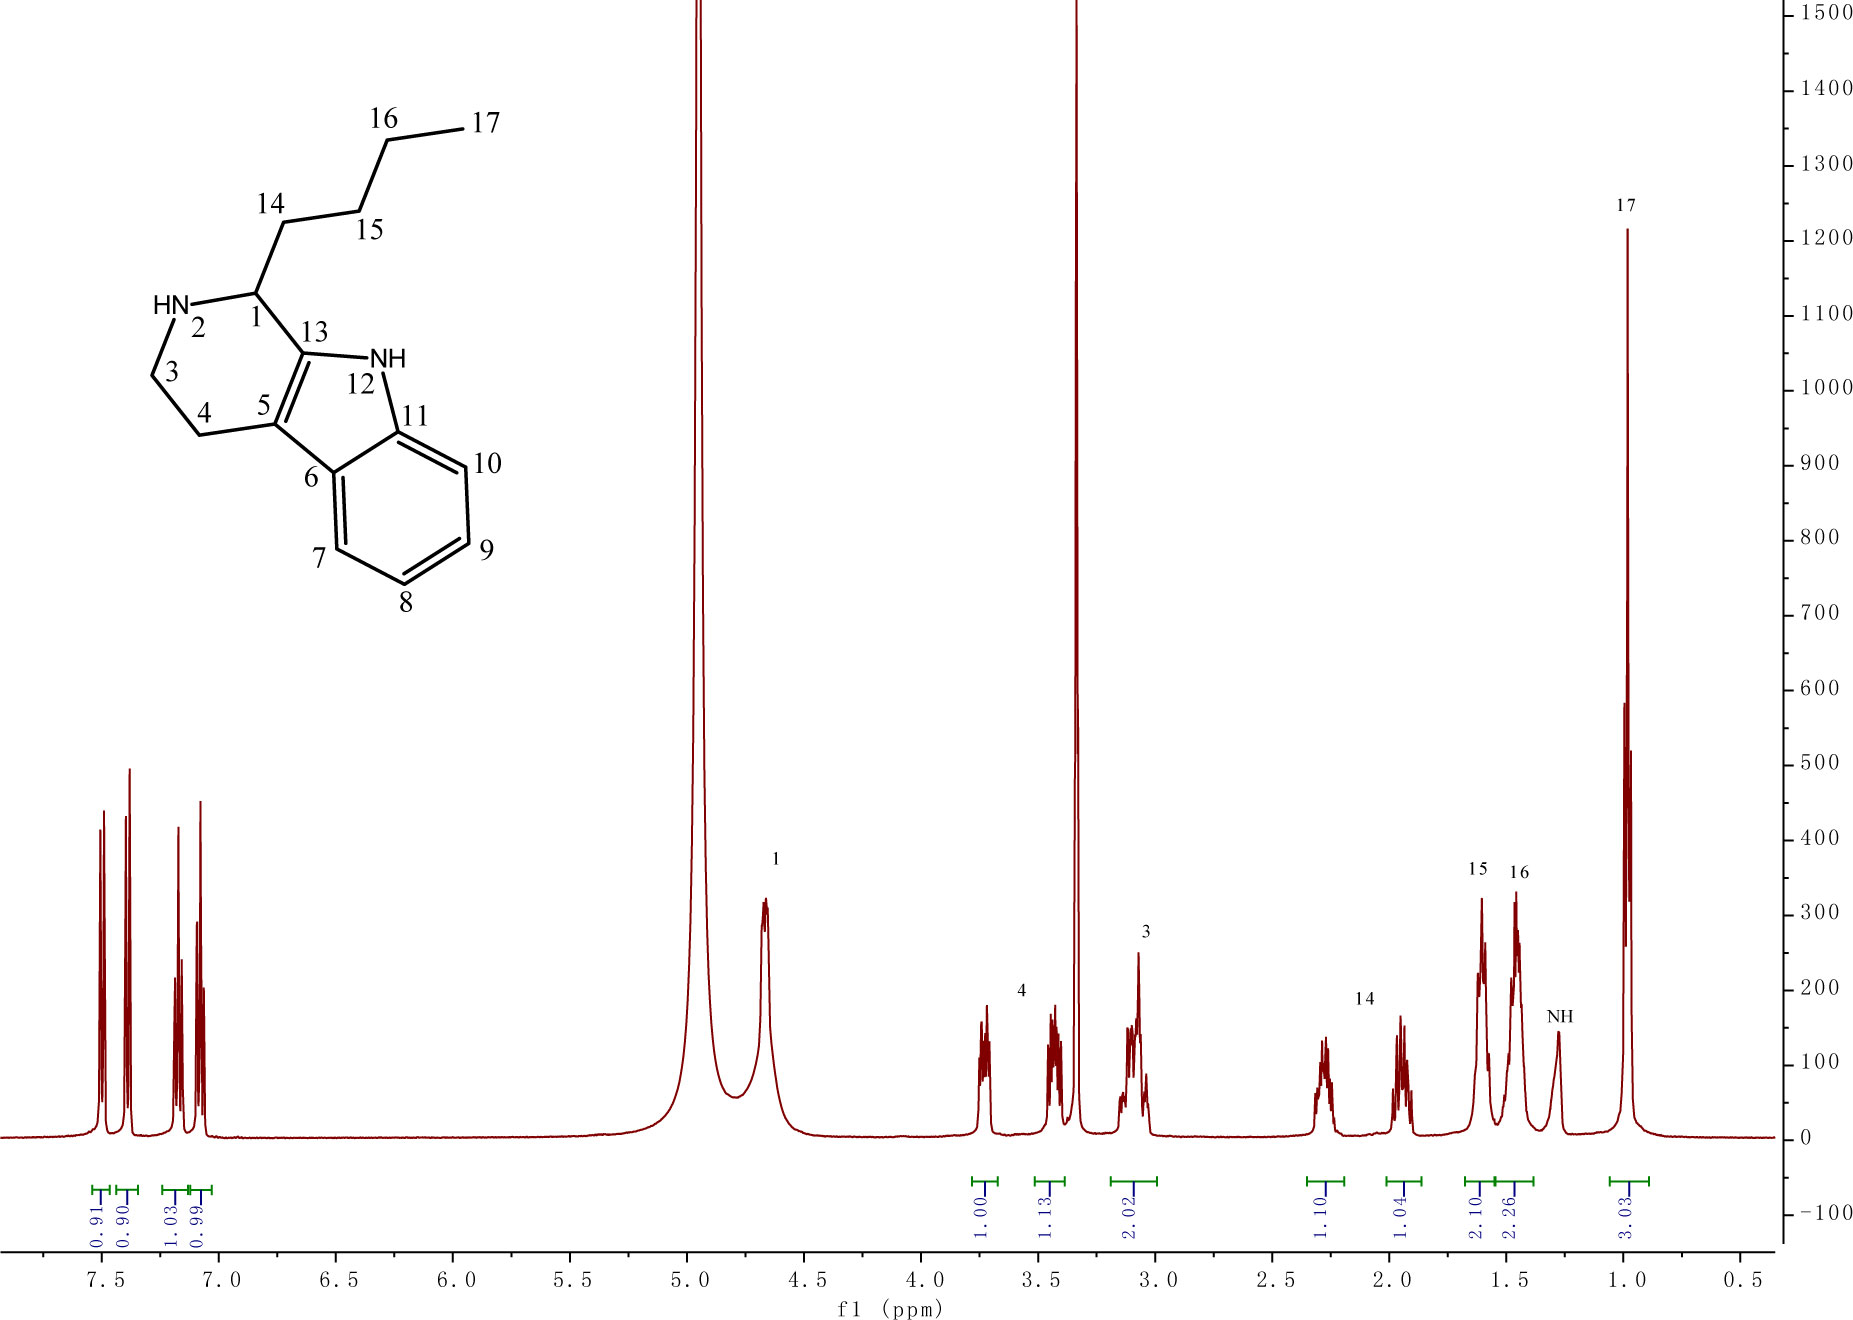


Fig. S48. 1H NMR of compound **22**.
